# Supplementary material for: Comparative proteomics of geographically distinct saw-scaled viper (Echis carinatus) venoms from India
Source: PubMed Central journal article supplement — Toxicon X. 2020 Jun 23;7:100048. doi: 10.1016/j.toxcx.2020.100048 (PMC7322182; doi:10.1016/j.toxcx.2020.100048), 2020-06-23
Supplement: mmc2.pdf [file mmc2.pdf]

Supplementary material S2

Comparative proteomics of geographically distinct saw-scaled viper (*Echis carinatus*)  
venoms from India

Siddharth Bhatia, Karthikeyan Vasudevan\*

CSIR-Centre for Cellular and molecular biology, Laboratory for the Conservation of  
Endangered Species, Hyderabad, India  
Email: karthik@ccmb.res.in

**Contents:**

Supplementary Table 1, 2, 3, 4, 5, 6

Supplementary Table 1: Assignment of peptides sequenced from MS/MS spectra against protein database from *Echis* genus for ECVTN. Relative abundance of each protein from HPLC fractions were estimated by taking sum of precursor abundance of all peptides matched to respective proteins.

| Peak no. | Mol. Wt. by SDS-PAGE |                     | Peak fraction | Protein Information |                                                                             |                                |                   |              |          |                  | Peptide Information          |                    |                               |                                                                                                                                                        |                                           |                                                                                                        |
|----------|----------------------|---------------------|---------------|---------------------|-----------------------------------------------------------------------------|--------------------------------|-------------------|--------------|----------|------------------|------------------------------|--------------------|-------------------------------|--------------------------------------------------------------------------------------------------------------------------------------------------------|-------------------------------------------|--------------------------------------------------------------------------------------------------------|
|          | Reducing (-kDa)      | Non-reducing (-kDa) |               | Accession           | Description                                                                 | Toxin family                   | # Unique Peptides | Coverage [%] | MW [kDa] | Score Sequest HT | Sum of precursors Abundances | Relative abundance | Relative fraction of proteins | Sequence                                                                                                                                               | Charge                                    | m/z [Da]                                                                                               |
| 1 to 3   | n.f                  | n.f                 |               | P17347.2            | Disintegrin echistatin-abha                                                 | Disintegrin                    | 1                 | 78           | 5.4      | 16.97            | 1960729.875                  |                    |                               | FLKEGTICKR<br>GDDMDDYCNGKTCDCPR<br>ARGDDMDDYCNGK<br>QCESGPPCR                                                                                          | 3<br>3<br>3<br>2                          | 417.9010<br>693.9110<br>511.5300<br>577.7055                                                           |
| 4        | 16                   | 14 and 12           | 0.042176      | AAW82478.1          | Disintegrin, partial [Echis carinatus]                                      | Disintegrin                    | 3                 | 86           | 7.1      | 131.72           | 1810944746                   | 0.99198393         | 0.0418379                     | EGEHCISGPCCR<br>FLNAGTICKR<br>NSVHPCCDPVK<br>AML DGLHDYCTGVTSDCPR<br>NCKFLNAGTICK                                                                      | 3<br>2<br>2<br>3<br>3                     | 487.8596<br>590.3134<br>656.7917<br>728.6441<br>475.9034                                               |
|          |                      |                     |               | ADI47722.1          | Disintegrin domain of metalloproteinase [Echis carinatus sochureki]         | Disintegrin domain (P-II svMP) | 2                 | 4            | 53.6     | 41.7             | 14633958                     | 0.00801607         | 0.0003381                     | RAVGDDMDDYCISGTPDCPR                                                                                                                                   | 3                                         | 772.6488                                                                                               |
| 5        | 25                   | 12                  | 0.051094      | AAW82478.1          | disintegrin, partial [Echis carinatus]                                      | Disintegrin                    | 7                 | 92           | 7.1      | 90.8             | 313833205.3                  | 0.87976949         | 0.0449509                     | FLNAGTICK<br>AML DGLHDYCTGVTSDCPR<br>EGEHCISGPCCR<br>NSVHPCCDPVK<br>RAMLDGLHDYCTGVTSDCPR<br>NSVHPCCDPVKCEPR<br>NCKFLNAGTICK                            | 2<br>3<br>2<br>2<br>3<br>3<br>3           | 512.2694<br>723.3123<br>731.2863<br>656.7914<br>780.6779<br>618.9397<br>475.9031                       |
|          |                      |                     |               | CAJ40966.1          | MLD-containing dimeric disintegrin EO5A subunit precursor [Echis ocellatus] | Disintegrin                    | 3                 | 35           | 12.4     | 8.25             | 2611245.023                  | 0.00732011         | 0.000374                      | TMLDGLNDYCTGVTSDCPR<br>FLNSGTICK                                                                                                                       | 3<br>3                                    | 730.9695<br>520.2657                                                                                   |
|          |                      |                     |               | ADI47722.1          | Disintegrin domain of metalloproteinase [Echis carinatus sochureki]         | Disintegrin domain (P-II svMP) | 2                 | 4            | 53.6     | 46.17            | 40277634.09                  | 0.1129104          | 0.005769                      | RAVGDDMDDYCISGTPDCPR                                                                                                                                   | 3                                         | 772.6483                                                                                               |
| 6        | 25                   | 25                  | 0.032221      | ADI47583.1          | DC domain of metalloproteinase [Echis carinatus sochureki]                  | DC domain (P-III svMP)         | 7                 | 15           | 46.1     | 157.77           | 1539583047                   | 0.98029612         | 0.0315861                     | LFCEIHK<br>FMSAQTECRPTR<br>AESFYCR<br>KENDVMIPCAPEDVK                                                                                                  | 2<br>2<br>2<br>3                          | 461.7571<br>742.3431<br>548.2325<br>582.2799                                                           |
|          |                      |                     |               | ADI47625.1          | DC domain of metalloproteinase [Echis coloratus]                            | DC domain (P-III svMP)         | 3                 | 5            | 68       | 7.92             | 12309335.72                  | 0.0078377          | 0.0002525                     | KENDVLIPCAQDDVK<br>YPYGDEGMVDPGK                                                                                                                       | 3<br>2                                    | 586.9526<br>764.8389                                                                                   |
|          |                      |                     |               | CAJ01683.1          | DC domain of group III snake venom metalloproteinase [Echis ocellatus]      | DC domain (P-III svMP)         | 2                 | 4            | 68.9     | 6.4              | 18636174.69                  | 0.01186618         | 0.0003823                     | YDYSENPYGMVEEGTK                                                                                                                                       | 2                                         | 1006.908                                                                                               |
| 7        | smeared around 27-35 | 27 and 14           | 0.015235      | ADI47586.1          | DC domain of metalloproteinase [Echis carinatus sochureki]                  | DC domain (P-III svMP)         | 2                 | 3            | 69.1     | 1.71             | 8237477.813                  | 0.12709357         | 0.0019363                     | WRLSDLLNRR                                                                                                                                             | 2                                         | 665.8593                                                                                               |
|          |                      |                     |               | JAC88974.1          | nerve growth factor a [Echis coloratus]                                     | NGF                            | 4                 | 16           | 27.2     | 16.87            | 56576800.79                  | 0.87290643         | 0.0132987                     | ALTMEGNQASWR<br>QYFFETK<br>NSNPVPSGCR<br>INTACVCVSR                                                                                                    | 2<br>2<br>2<br>2                          | 682.3253<br>482.2267<br>544.251<br>646.8278                                                            |
| 8        | 54, 43, and 27       | 27                  | 0.006168      | ADW54339.1          | group III snake venom metalloproteinase [Echis ocellatus]                   | P-III svMP                     | 2                 | 4            | 72.8     | 32.3             | 568951191.1                  | 0.95700306         | 0.0059028                     | ANEEDKGMVDEGTK                                                                                                                                         | 2                                         | 762.33                                                                                                 |
|          |                      |                     |               | ADI47586.1          | metalloproteinase [Echis carinatus sochureki]                               | P-III svMP                     | 3                 | 5            | 69.1     | 6.79             | 3955986.188                  | 0.00665416         | 4.104E-05                     | LGNTYAYCR<br>LYCFDNLPEHK<br>WRLSDLLNRR                                                                                                                 | 2<br>3<br>2                               | 559.7454<br>479.2268<br>665.3677                                                                       |
|          |                      |                     |               | JAC88974.1          | nerve growth factor a [Echis coloratus]                                     | NGF                            | 2                 | 8            | 27.2     | 3.37             | 21606270                     | 0.03634278         | 0.0002242                     | ALTMEGNQASWR<br>QYFFETK                                                                                                                                | 2<br>2                                    | 682.3252<br>481.7334                                                                                   |
| 9        | 14                   | 14                  | 0.044002      | pdb11OZ6IA          | A Chain A, Phospholipase A2                                                 | PLA2                           | 12                | 69           | 13.7     | 177.03           | 15326356178                  | 0.99295257         | 0.0436919                     | NLYQFGR<br>MTLYSYR<br>EAAICLGENVNTYDKK<br>FENGDIICDNK<br>NLYQFGRMIWNR<br>TGKLPILSYGSYCYGCGWGGQGGPPK<br>FENGDIICDNKDPCKR<br>MIWNRGTGK<br>VGDCSPKMTLYSYR | 2<br>2<br>3<br>2<br>2<br>3<br>3<br>3<br>3 | 449.232<br>475.2262<br>608.9648<br>662.797<br>799.4103<br>901.7354<br>660.9892<br>503.2687<br>564.9321 |
|          |                      |                     |               | ADI47583.1          | metalloproteinase, partial [Echis carinatus sochureki]                      | P-III svMP                     | 2                 | 25           | 39       | 28.24            | 1353541.5                    | 8.7692E-05         | 3.859E-06                     | IPNSEAHAVYK<br>GETYFIEPLK<br>EITTNPLVK                                                                                                                 | 3<br>2<br>2                               | 410.2167<br>598.8138<br>507.7953                                                                       |
|          |                      |                     |               | ADI47586.1          | metalloproteinase [Echis carinatus sochureki]                               | P-III svMP                     | 2                 | 9            | 69.1     | 21.94            | 15651210.51                  | 0.001014           | 4.462E-05                     | YEDTMQYEFK<br>WRLSDLLNRR<br>GEAVVLHLEK                                                                                                                 | 2<br>2<br>2                               | 677.2865<br>665.367<br>547.8152                                                                        |
|          |                      |                     |               | CAA55566.1          | metalloprotease, partial [Echis pyramidum]                                  | P-III svMP                     | 2                 | 6            | 61.9     | 16.84            | 759540.2578                  | 4.9209E-05         | 2.165E-06                     | IPDSEAHAVYK<br>GEPVVLHLQK<br>YENIEKEDQAPK                                                                                                              | 2<br>3<br>3                               | 615.3122<br>560.8212<br>488.8999                                                                       |
|          |                      |                     |               | JAC88974.1          | nerve growth factor a [Echis coloratus]                                     | NGF                            | 3                 | 12           | 27.2     | 15.16            | 88733444.13                  | 0.0057488          | 0.000253                      | NSNPVPSGCR<br>QYFFETK                                                                                                                                  | 2<br>2                                    | 544.2534<br>481.7339                                                                                   |
|          |                      |                     |               | AAN77202.1          | acidic phospholipase A2 [Echis carinatus sochureki]                         | PLA2                           | 2                 | 21           | 15.9     | 73.44            | 1592905.438                  | 0.0001032          | 4.541E-06                     | ALTMEGNQASWR<br>MTLYSYR<br>VNNCSPKMTLYSYR                                                                                                              | 2<br>2<br>3                               | 682.3251<br>467.2285<br>578.2796                                                                       |
|          |                      |                     |               | Q7T248.2            | Snaclec echicetin subunit alpha; Flags: Precursor                           | Snaclecs                       | 2                 | 11           | 15.7     | 1.85             | 687410.1094                  | 4.4535E-05         | 1.96E-06                      | FENGDIICDNDPCR<br>SYEIAIR                                                                                                                              | 2<br>2                                    | 594.58<br>426.2346                                                                                     |

|    |                |               |          |             |                                                                |          |   |    |      |        |             |            |           |                                                                         |   |                                                                                                                                       |
|----|----------------|---------------|----------|-------------|----------------------------------------------------------------|----------|---|----|------|--------|-------------|------------|-----------|-------------------------------------------------------------------------|---|---------------------------------------------------------------------------------------------------------------------------------------|
| 10 | 14             | 14            | 0.109653 | pdb1 OZ6 A  | A Chain A, Phospholipase A2                                    | PLA2     | 3 | 25 | 13.7 | 41     | 94206904.41 | 0.98587366 | 0.108104  | IWTGLSER                                                                | 2 | 481.2588                                                                                                                              |
|    |                |               |          | JAC88974.1  | nerve growth factor a [Echis coloratus]                        | NGF      | 2 | 8  | 27.2 | 5.35   | 1349867.922 | 0.01412634 | 0.001549  | MTLYSYR<br>EAAILCLGENVNTYDKK<br>NLYQFGR                                 | 3 | 467.2282<br>3 608.9631<br>2 449.2318                                                                                                  |
|    |                |               |          | JAC96631.1  | Cysteine-Rich Secretory Protein B [Echis coloratus]            | CRISP    | 2 | 10 | 26.7 | 1.9    | 699060.6641 | 7.3872E-05 | 1.995E-06 | ALTMEGNQASWR<br>QYFFETK                                                 | 2 | 682.3226<br>2 481.7345                                                                                                                |
|    |                |               |          | pdbj 2QHE A | A Chain A, Phospholipase A2                                    | PLA2     | 2 | 13 | 13.8 | 57.64  | 9296663015  | 0.98240467 | 0.0265357 | NLYQFGR                                                                 | 2 | 449.2352<br>2 467.2282<br>2 603.3022<br>2 769.3408                                                                                    |
|    |                |               |          | Q7T248.2    | Snaclec echicetin subunit alpha; Flags: Precursor              | Snaclecs | 4 | 23 | 15.7 | 9.49   | 162565100   | 0.01717871 | 0.000464  | MIQETGK<br>KNLNTYNK<br>TWDEAEK<br>SYEIAIR<br>IWTGLSER<br>YSECFVLEK      | 2 | 468.25<br>2 498.26<br>2 439.6978<br>2 426.2345<br>2 481.2582<br>2 587.7773                                                            |
| 12 | 30 and 27      | 30, 27 and 14 | 0.026156 | ADI47565.1  | serine protease, partial [Echis carinatus sochurek]            | svSP     | 5 | 31 | 26.2 | 48.76  | 402006816.3 | 0.05089406 | 0.0013312 | IFDYSVCR                                                                | 2 | 530.25<br>2 604.82<br>2 413.71<br>3 611.62<br>2 732.32<br>2 682.33<br>2 481.73<br>3 486.91<br>3 529.61                                |
|    |                |               |          | JAC88974.1  | nerve growth factor a [Echis coloratus]                        | NGF      | 2 | 8  | 27.2 | 10.05  | 14933076.71 | 0.00189053 | 4.945E-05 | NVRNENEEMRVPAEK<br>NENEEMRVPAEK<br>ALTMEGNQASWR<br>QYFFETK              | 2 | 595.3<br>2 434.76<br>2 583.26<br>3 640.35<br>2 769.34<br>2 426.23<br>3 476.55<br>2 616.79<br>2 481.26<br>2 587.78                     |
|    |                |               |          | ADI47568.1  | serine protease, partial [Echis coloratus]                     | svSP     | 4 | 6  | 25.4 | 14.17  | 5106560.785 | 0.00064649 | 1.691E-05 | VLNDEETREPK<br>KVLNDEETREPK                                             | 3 | 595.3<br>2 434.76<br>2 583.26<br>3 640.35<br>2 769.34<br>2 426.23<br>3 476.55<br>2 616.79<br>2 481.26<br>2 587.78                     |
|    |                |               |          | JAC96631.1  | Cysteine-Rich Secretory Protein B [Echis coloratus]            | CRISP    | 5 | 26 | 24.7 | 29.73  | 20834113.96 | 0.0026376  | 6.899E-05 | SVNPTASNMLR<br>WTAIHK<br>NVDFDSESPR<br>KPEIQNEIDLHNSLR<br>MEWYPEAAANAER | 2 | 595.3<br>2 434.76<br>2 583.26<br>3 640.35<br>2 769.34<br>2 426.23<br>3 476.55<br>2 616.79<br>2 481.26<br>2 587.78                     |
|    |                |               |          | Q7T248.2    | Snaclec echicetin subunit alpha; Flags: Precursor              | Snaclecs | 7 | 36 | 15.7 | 90.75  | 7456014198  | 0.94393132 | 0.0246895 | SYEIAIR<br>TWDEAEKFCNK<br>EPKTWDEAEK<br>IWTGLSER<br>YSECFVLEK           | 2 | 595.3<br>2 434.76<br>2 583.26<br>3 640.35<br>2 769.34<br>2 426.23<br>3 476.55<br>2 616.79<br>2 481.26<br>2 587.78                     |
| 13 | 30             | 14            | 0.008274 | pdbj OZ6 A  | A Chain A, Phospholipase A2                                    | PLA2     | 3 | 19 | 13.7 | 6.35   | 3186705.5   | 0.00035705 | 2.954E-06 | NLYQFGR                                                                 | 2 | 449.2326                                                                                                                              |
|    |                |               |          | JAC88974.1  | nerve growth factor a [Echis coloratus]                        | NGF      | 2 | 8  | 27.2 | 5.21   | 10979075.75 | 0.00123013 | 1.018E-05 | ALTMEGNQASWR<br>QYFFETK                                                 | 2 | 682.33<br>2 481.73<br>2 418.7242<br>2 769.8853<br>2 434.2055<br>2 408.744<br>3 476.88<br>2 426.23<br>2 481.26<br>2 616.79<br>2 587.78 |
|    |                |               |          | JAC96617.1  | C-type lectin J [Echis coloratus]                              | Snaclecs | 4 | 21 | 18.3 | 10.97  | 31490933.5  | 0.00352833 | 2.919E-05 | TWFNLR<br>SSADYVWIGLWNK<br>NCFGLEK<br>LISENIK                           | 2 | 418.7242<br>2 769.8853<br>2 434.2055<br>2 408.744                                                                                     |
|    |                |               |          | Q7T248.2    | Snaclec echicetin subunit alpha                                | Snaclecs | 6 | 36 | 15.7 | 99.49  | 8879508107  | 0.9948845  | 0.0082317 | TWDEAEKFCNK<br>SYEIAIR<br>IWTGLSER<br>EPKTWDEAEK<br>YSECFVLEK           | 3 | 476.88<br>2 426.23<br>2 481.26<br>2 616.79<br>2 587.78                                                                                |
| 14 | 27             | 16 and 12     | 0.110645 | pdbj OZ6 A  | A Chain A, Phospholipase A2                                    | PLA2     | 2 | 12 | 13.7 | 5.42   | 5394921.688 | 0.00089431 | 9.895E-05 | NLYQFGR                                                                 | 2 | 449.23                                                                                                                                |
|    |                |               |          | P81017.1    | Snaclec echicetin subunit alpha                                | Snaclecs | 2 | 13 | 15.8 | 5.83   | 14261219.25 | 0.00236407 | 0.0002616 | MTLYSYR<br>TWDEAEK<br>VWIGLRDR                                          | 2 | 475.22<br>2 439.7<br>2 508.29<br>2 560.29<br>2 769.88<br>2 848.43<br>2 434.2<br>2 418.72<br>2 408.74                                  |
|    |                |               |          | JAC96617.1  | C-type lectin J [Echis coloratus]                              | Snaclecs | 6 | 22 | 18.3 | 309.51 | 4611285889  | 0.7644092  | 0.0845781 | LISENIK<br>SSADYVWIGLWNK<br>SSADYVWIGLWNKR<br>NCFGLEK<br>TWFNLR         | 2 | 769.88<br>2 848.43<br>2 434.2<br>2 418.72<br>2 408.74                                                                                 |
|    |                |               |          | AAB32774.1  | echicetin beta subunit[Echis carinatus]                        | Snaclecs | 2 | 29 | 14.9 | 20.2   | 351772439   | 0.05831304 | 0.006452  | LISENIK<br>MNVADAER<br>DGHLSFRNSK<br>QVKDGHLSFR<br>EVDFMISLAFPMK        | 2 | 490.71<br>3 420.88<br>3 429.24<br>2 836.92                                                                                            |
|    |                |               |          | Q7T248.2    | Snaclec echicetin subunit alpha                                | Snaclecs | 4 | 26 | 15.7 | 19.37  | 1049769035  | 0.17401938 | 0.0192544 | TWDEAEK<br>SYEIAIR<br>IWTGLSER<br>EPKTWDEAEK                            | 2 | 439.6974<br>2 426.234<br>2 481.2589<br>3 411.5312                                                                                     |
| 15 | 30, 27, and 25 | 14 and 12     | 0.09949  | pdbj OZ6 A  | A Chain A, Phospholipase A2                                    | PLA2     | 2 | 12 | 13.7 | 3.34   | 2294357.938 | 0.00032741 | 3.257E-05 | NLYQFGR                                                                 | 2 | 449.2325                                                                                                                              |
|    |                |               |          | Q9PSM9.1    | Snaclec coagulation factor IX/factor X-binding protein subunit | Snaclecs | 3 | 13 | 15.4 | 6.87   | 362398269.5 | 0.05171475 | 0.0051451 | MTLYSYR<br>VFNEYK<br>VFNEYKTKW<br>LISENLEK                              | 2 | 467.2285<br>2 400.2<br>2 607.81<br>2 473.27                                                                                           |
|    |                |               |          | JAC96617.1  | C-type lectin J [Echis coloratus]                              | Snaclecs | 5 | 22 | 18.3 | 33.52  | 151684865.5 | 0.02164564 | 0.0021535 | SSADYVWIGLWNKR<br>TWFNLR<br>NCFGLEK<br>LISENIK                          | 2 | 847.94<br>2 418.72<br>2 434.7<br>2 408.74                                                                                             |
|    |                |               |          | AAB32774.1  | echicetin beta subunit[Echis carinatus]                        | Snaclecs | 4 | 46 | 14.9 | 80.17  | 2673184408  | 0.38146719 | 0.0379522 | DGHLSFRNSK<br>ERMNVADAER<br>MNVADAER<br>QVKDGHLSFR                      | 3 | 420.88<br>2 633.28<br>2 490.71<br>3 429.24                                                                                            |

|    |                      |                       |          |            |                                                                  |            |   |    |      |       |             |            |           |                                                                                     |                            |                                                          |  |  |                                   |        |                 |
|----|----------------------|-----------------------|----------|------------|------------------------------------------------------------------|------------|---|----|------|-------|-------------|------------|-----------|-------------------------------------------------------------------------------------|----------------------------|----------------------------------------------------------|--|--|-----------------------------------|--------|-----------------|
|    |                      |                       |          |            |                                                                  |            |   |    |      |       |             |            |           |                                                                                     |                            |                                                          |  |  | DCYWEWSDGAQLDYK<br>EVDFMISLAFPMLK | 2<br>2 | 968.4<br>820.92 |
|    |                      |                       |          | Q7T248.2   | Snaclec echicetin subunit alpha                                  | Snaclecs   | 4 | 26 | 15.7 | 50.26 | 3818077188  | 0.54484501 | 0.0542066 | SYEIAIR<br>TWDEAEKFCNK<br>IWTGLSER<br>YSECFVLEK                                     | 2<br>3<br>2<br>2           | 426.2352<br>476.5472<br>481.2595<br>587.7765             |  |  |                                   |        |                 |
| 16 | 30, 27, 25<br>and 23 | 16, 15, 14,<br>and 12 | 0.062186 | JAC88974.1 | nerve growth factor a [Echis coloratus]                          | NGF        | 2 | 16 | 27.2 | 4.4   | 2709140.938 | 0.0007789  | 4.844E-05 | ALTMEGNQASWR                                                                        | 2                          | 682.33                                                   |  |  |                                   |        |                 |
|    |                      |                       |          | pdb 1V7P B | B Chain B, Ems16 B Chain                                         | Snaclecs   | 3 | 28 | 15.1 | 17.29 | 15686961.45 | 0.00451012 | 0.0002805 | WEWSDNAR<br>FTSMWIGLNNPWK<br>LASHSSEEEAFVSK                                         | 2<br>2<br>2                | 532.2334<br>805.3988<br>817.409                          |  |  |                                   |        |                 |
|    |                      |                       |          | P81017.1   | Snaclec echicetin subunit alpha                                  | Snaclecs   | 2 | 13 | 15.8 | 13.59 | 59843921.88 | 0.01720559 | 0.0010699 | TWDEAEK<br>VWIGLRDR<br>LKTWDEAEK                                                    | 2<br>2<br>2                | 439.6981<br>508.2904<br>560.2878                         |  |  |                                   |        |                 |
|    |                      |                       |          | Q9PSM9.1   | Snaclec coagulation factor IX/factor X-binding protein subunit A | Snaclecs   | 3 | 17 | 15.4 | 5.11  | 372295889.6 | 0.10703797 | 0.0066563 | VFNEYK<br>VFNEYKTVK<br>WKGCSSEWSDGSK                                                | 2<br>3<br>3                | 400.2<br>405.55<br>528.9                                 |  |  |                                   |        |                 |
|    |                      |                       |          | BAC77706.1 | EMS16 A chain [Echis multisquamatus]                             | Snaclecs   | 2 | 11 | 18.2 | 1.62  | 9511052.625 | 0.0027345  | 0.00017   | IYVNWK                                                                              | 2                          | 468.2719                                                 |  |  |                                   |        |                 |
|    |                      |                       |          | JAC96617.1 | C-type lectin J [Echis coloratus]                                | Snaclecs   | 6 | 26 | 18.3 | 27.53 | 142762475.3 | 0.04104532 | 0.0025524 | SSADYYWIGLWLNK<br>SSADYYWIGLWLNK<br>TWFNLR<br>RSRDAEK<br>NCFGLEK<br>LISENIK         | 3<br>3<br>2<br>2<br>2<br>2 | 769.89<br>565.63<br>418.72<br>431.72<br>434.21<br>408.74 |  |  |                                   |        |                 |
|    |                      |                       |          | AAB32774.1 | echicetin beta subunit[Echis carinatus]                          | Snaclecs   | 2 | 31 | 14.9 | 42.53 | 834706257.4 | 0.23998456 | 0.0149237 | DGHLVSFR<br>DGHLVSFRNSK<br>ERMNWADAER<br>MNWADAER<br>EVDFMISLAFPMLK<br>QVKDGHLVSFR  | 2<br>3<br>3<br>2<br>2<br>3 | 465.74<br>420.88<br>417.19<br>490.71<br>528.92<br>429.24 |  |  |                                   |        |                 |
|    |                      |                       |          | Q7T248.2   | Snaclec echicetin subunit alpha                                  | Snaclecs   | 4 | 30 | 15.7 | 29.36 | 2040650854  | 0.58670303 | 0.0364847 | TWDEAEK<br>SYEIAIR<br>DGHLLSIESK<br>IWTGLSER<br>YSECFVLEK                           | 2<br>2<br>2<br>2<br>2      | 439.6981<br>426.2349<br>549.7931<br>481.2597<br>587.7766 |  |  |                                   |        |                 |
| 17 |                      |                       | 0.004362 | pdb 1OZ6 A | A Chain A, Phospholipase A2                                      | PLA2       | 2 | 12 | 13.7 | 5.1   | 3359248.484 | 0.00106688 | 4.654E-06 | MTLSYSR<br>NLYQFGR<br>VPLVGMFEFVNQR                                                 | 2<br>2<br>2                | 475.23<br>449.23<br>746.38                               |  |  |                                   |        |                 |
|    |                      |                       |          | ADI47590.1 | metalloproteinase [Echis carinatus sochureki]                    | P-III svMP | 3 | 6  | 69.5 | 30.18 | 18743826.06 | 0.00595295 | 2.597E-05 |                                                                                     | 2                          | 481.73                                                   |  |  |                                   |        |                 |
|    |                      |                       |          | JAC88974.1 | nerve growth factor a [Echis coloratus]                          | NGF        | 2 | 8  | 27.2 | 8.17  | 13573471.5  | 0.00431087 | 1.88E-05  | QYFFETK<br>ALTMEGNQASWR                                                             | 2<br>2                     | 690.32<br>532.23                                         |  |  |                                   |        |                 |
|    |                      |                       |          | pdb 1V7P B | B Chain B, Ems16 B Chain                                         | Snaclecs   | 4 | 33 | 15.1 | 37.07 | 18494306.83 | 0.0058737  | 2.562E-05 | WEWSDNAR<br>FTSMWIGLNNPWK<br>LASHSSEEEAFVSK                                         | 2<br>3<br>3                | 797.4<br>545.27<br>435.24                                |  |  |                                   |        |                 |
|    |                      |                       |          | CAA55566.1 | metalloprotease, partial [Echis pyramidum]                       | P-III svMP | 2 | 5  | 61.9 | 33.99 | 68851732.75 | 0.02186697 | 9.538E-05 | IFWFTR<br>KENDVPIPCAQEDVK                                                           | 2<br>2                     | 871.43                                                   |  |  |                                   |        |                 |
|    |                      |                       |          | ADI47568.1 | serine protease, partial [Echis coloratus]                       | svSP       | 4 | 6  | 25.4 | 28.17 | 60270351.11 | 0.01914157 | 8.35E-05  | VLNEDEETREP<br>VLNEDEETR<br>KVLNEDEETREP<br>KVLNEDEETR                              | 3<br>2<br>3<br>2           | 486.91<br>552.76<br>529.61<br>616.81                     |  |  |                                   |        |                 |
|    |                      |                       |          | JAC96580.1 | L-amino acid oxidase B variant 1 [Echis coloratus]               | LAEO       | 5 | 12 | 56.7 | 16.35 | 8586397.953 | 0.002727   | 1.19E-05  | STTDLPSR<br>VTVLEASER<br>YDTYSTK<br>EADYEEFLEIAR                                    | 2<br>2<br>2<br>2           | 502.28<br>439.2<br>742.85<br>753.74                      |  |  |                                   |        |                 |
|    |                      |                       |          | ADI47566.1 | serine protease, partial [Echis coloratus]                       | svSP       | 3 | 12 | 28.8 | 5.4   | 27714300.16 | 0.00880193 | 3.839E-05 | DIVVVGAGMSGLSAAAYVLGAGHK<br>TFACAGVLOGGK<br>AAYPWLPVNSR<br>AAYPWLPVNSR<br>ETYFCLPNK | 3<br>2<br>2<br>2<br>3      | 569.2892<br>637.8301<br>637.3386<br>586.7728<br>612.96   |  |  |                                   |        |                 |
|    |                      |                       |          | BAC77706.1 | EMS16 A chain [Echis multisquamatus]                             | Snaclecs   | 4 | 27 | 18.2 | 20.4  | 27775671.77 | 0.00882142 | 3.848E-05 | EEGNFVAQLVSGFMHR<br>DGHLVSQRS<br>IYVNWK                                             | 2<br>2<br>2                | 556.3<br>468.27<br>434.21                                |  |  |                                   |        |                 |
|    |                      |                       |          | JAC96617.1 | C-type lectin J [Echis coloratus]                                | Snaclecs   | 4 | 21 | 18.3 | 26.55 | 127979056.8 | 0.04064552 | 0.0001773 | NCFGLEK<br>SSADYYWIGLWLNK<br>TWFNLR<br>LISENIK                                      | 2<br>2<br>2<br>2           | 769.89<br>418.72<br>408.75<br>581.32                     |  |  |                                   |        |                 |
|    |                      |                       |          | ADI47556.1 | serine protease, partial [Echis ocellatus]                       | svSP       | 2 | 17 | 21.8 | 7.93  | 9984451.594 | 0.00317101 | 1.383E-05 | WPKDIMLIK<br>AAFGRLPQASR<br>IMGWGAITSPNK                                            | 2<br>2<br>2                | 587.81<br>645.83<br>462.2343                             |  |  |                                   |        |                 |
|    |                      |                       |          | ADI47570.1 | serine protease, partial [Echis coloratus]                       | svSP       | 3 | 8  | 26.4 | 20.6  | 827834415.3 | 0.26291617 | 0.0011468 | NFTLWDK<br>EAYGGLPEKSR<br>EAYGGLPEK                                                 | 2<br>2<br>2                | 402.8752<br>482.2431<br>482.71                           |  |  |                                   |        |                 |
|    |                      |                       |          | AAB32774.1 | echicetin beta subunit[Echis carinatus]                          | Snaclecs   | 2 | 32 | 14.9 | 38.73 | 865012172.4 | 0.27472364 | 0.0011983 | MNWADAER<br>ERMNWADAER<br>DGHLVSFR<br>TTDNQWMR<br>MELVWIGLSDYYWR                    | 3<br>2<br>2<br>2<br>2      | 422.52<br>465.74<br>526.24<br>842.41<br>439.6981         |  |  |                                   |        |                 |
|    |                      |                       |          | Q7T248.2   | Snaclec echicetin subunit alpha                                  | Snaclecs   | 4 | 30 | 15.7 | 37.54 | 986794247.4 | 0.31340103 | 0.0013671 | TWDEAEK<br>SYEIAIR<br>DGHLLSIESK<br>IWTGLSER<br>YSECFVLEK                           | 2<br>2<br>2<br>2<br>2      | 426.2348<br>549.7932<br>481.2597<br>587.7762<br>549.26   |  |  |                                   |        |                 |
|    |                      |                       |          | ADI47577.1 | metalloproteinase [Echis carinatus sochureki]                    | P-III svMP | 2 | 3  | 68.1 | 18.04 | 83689402.63 | 0.02657935 | 0.0001159 | YNNDLTAMR<br>ASDLLSHK                                                               | 2<br>2                     | 549.26<br>435.74                                         |  |  |                                   |        |                 |



|    |                                 |                    |          |                                      |                                                                                                                                           |                                      |             |              |                      |                      |                                         |                                      |                                     |                                                                                                                                                                                                                                       |                                                                    |                                                                                                                                                   |
|----|---------------------------------|--------------------|----------|--------------------------------------|-------------------------------------------------------------------------------------------------------------------------------------------|--------------------------------------|-------------|--------------|----------------------|----------------------|-----------------------------------------|--------------------------------------|-------------------------------------|---------------------------------------------------------------------------------------------------------------------------------------------------------------------------------------------------------------------------------------|--------------------------------------------------------------------|---------------------------------------------------------------------------------------------------------------------------------------------------|
|    |                                 |                    |          | ADI47638.1                           | metalloproteinase [Echis coloratus]                                                                                                       | P-III svMP                           | 4           | 18           | 70                   | 36.53                | 189185191.6                             | 0.00612641                           | 8.475E-05                           | NDIVSPPVCGNDLLEKGEEDCGSPENCRNPCCDAASCK<br>LHSWVECESGECQQCR<br>LFCKHDKNECR                                                                                                                                                             | 3<br>3<br>2                                                        | 1495.9<br>742.95<br>754.35                                                                                                                        |
|    |                                 |                    |          | CAJ01683.1                           | group III snake venom metalloproteinase [Echis ocellatus]                                                                                 | P-III svMP                           | 3           | 12           | 71.7                 | 46.45                | 208421618.5                             | 0.00674935                           | 9.337E-05                           | TDIVSPPVCGNDLLEK                                                                                                                                                                                                                      | 2                                                                  | 879.44                                                                                                                                            |
|    |                                 |                    |          | ANT80539.1                           | venom metalloprotease PIII-SVMP EOC00089 [Echis ocellatus]                                                                                | P-III svMP                           | 4           | 9            | 68.4                 | 29.36                | 9245852.5                               | 0.00029941                           | 4.142E-06                           | ENDVEIPCAPEDVK<br>LHSWVECESGACCDQCR                                                                                                                                                                                                   | 2<br>3                                                             | 807.87<br>718.94                                                                                                                                  |
|    |                                 |                    |          | ADW54356.1<br>ADI47552.1             | group III snake venom metalloproteinase [Echis carinatus sochureki]<br>serine protease, partial [Echis coloratus]                         | P-III svMP<br>svSP                   | 4<br>2      | 10<br>16     | 68.6<br>28.3         | 8.3<br>12.34         | 791873.4375<br>222102961.9              | 2.5643E-05<br>0.00719239             | 3.548E-07<br>9.95E-05               | IPCAPEDKCGR<br>WDKDMLIK<br>GDSGGPLICNGIQIGVSWGAK<br>ETYFCLPSR                                                                                                                                                                         | 3<br>2<br>3<br>2                                                   | 477.8811<br>589.32<br>739.36<br>586.77                                                                                                            |
|    |                                 |                    |          | ADI47676.1                           | metalloproteinase, partial [Echis pyramidum leakeyi]                                                                                      | P-III svMP                           | 3           | 18           | 50.2                 | 3.55                 | 22348389.06                             | 0.00072371                           | 1.001E-05                           | ESDLLNR<br>IPCEPEDIKCGR<br>LHSWAECESGECQQCR<br>SSPHAPISLPSNPPR<br>TLCAGILR<br>AAFGRLLPAQSR                                                                                                                                            | 2<br>3<br>3<br>3<br>2<br>2                                         | 423.72<br>491.9<br>733.61<br>557.6366<br>452.2568<br>587.8144                                                                                     |
|    |                                 |                    |          | ADE45140.1                           | serine protease, partial [Echis ocellatus]                                                                                                | svSP                                 | 3           | 14           | 28.2                 | 3.93                 | 246326055                               | 0.00797681                           | 0.0001104                           | KASQLVATSEQQRSYK<br>SYEIAIR<br>LKPGETCGDGMCCDQCR<br>LFCVPESTGNK<br>CSYDQYR<br>CIFDPPLR<br>YDYSEDPNYGMVDEGTK<br>CPIMYHQCVALFGPDATVGQDGCFFWNK                                                                                           | 2<br>3<br>3<br>2<br>2<br>2<br>3                                    | 913.9524<br>426.2343<br>687.2606<br>626.3052<br>496.1991<br>509.2638<br>991.9042<br>1123.13                                                       |
|    |                                 |                    |          | ADI47612.1<br>Q77248.2<br>ADI47584.1 | metalloproteinase [Echis coloratus]<br>Snaclec echicetin subunit alpha; Flags: Precursor<br>metalloproteinase [Echis carinatus sochureki] | P-III svMP<br>Snaclecs<br>P-III svMP | 2<br>2<br>2 | 9<br>11<br>5 | 68.7<br>15.7<br>69.3 | 5.36<br>3.79<br>2.65 | 38989332.5<br>1425855.25<br>2002900.625 | 0.0012626<br>4.6174E-05<br>6.486E-05 | 1.747E-05<br>6.388E-07<br>8.973E-07 | SYEIAIR<br>KASQLVATSEQQRSYK<br>LKPGETCGDGMCCDQCR<br>LFCVPESTGNK<br>CSYDQYR<br>CIFDPPLR<br>YDYSEDPNYGMVDEGTK<br>CPIMYHQCVALFGPDATVGQDGCFFWNK                                                                                           | 2<br>2<br>2                                                        | 913.9524<br>426.2343<br>687.2606                                                                                                                  |
|    |                                 |                    |          | ADI47593.1                           | metalloproteinase, partial [Echis carinatus sochureki]                                                                                    | P-III svMP                           | 2           | 6            | 28.3                 | 3.97                 | 2326243.625                             | 7.5331E-05                           | 1.042E-06                           | CSYDQYR<br>CIFDPPLR<br>YDYSEDPNYGMVDEGTK<br>CPIMYHQCVALFGPDATVGQDGCFFWNK                                                                                                                                                              | 2<br>2<br>2<br>3                                                   | 496.1991<br>509.2638<br>991.9042<br>1123.13                                                                                                       |
|    |                                 |                    |          | ADI47609.1                           | metalloproteinase, partial [Echis coloratus]                                                                                              | P-III svMP                           | 2           | 16           | 56.4                 | 2.32                 | 422834.5313                             | 1.3693E-05                           | 1.894E-07                           | YDYSEDPNYGMVDEGTK<br>CPIMYHQCVALFGPDATVGQDGCFFWNK                                                                                                                                                                                     | 3                                                                  | 1123.13                                                                                                                                           |
| 21 | 56,30,27,25,<br>and 23          | 56,16,14<br>and 12 | 0.009024 | ADI47580.1                           | metalloproteinase [Echis carinatus sochureki]                                                                                             | P-III svMP                           | 5           | 19           | 68.2                 | 184.37               | 10012281277                             | 0.95263219                           | 0.0085966                           | VIVVDHSMCTK<br><br>HPYGDGEMVEPGTK<br>YNDLTAMR<br>VYEMINTVNEIYMHIR<br>TDIVSPOVCGNGLLEK<br>ENDVPVPCAQEDVK<br>AHISSMCOATR<br>SECDLPESCTGQSAECPDHFHK<br>KENDVPVPCAQEDVK<br>TRVYEMINTVNEIYMDIR                                             | 3<br>2<br>2<br>3<br>2<br>2<br>3<br>3<br>3                          | 463.24<br>766.84<br>557.74<br>773.05<br>866.43<br>800.37<br>421.2<br>898.36<br>864.42<br>851.42                                                   |
|    |                                 |                    |          | ADI47595.1                           | metalloproteinase, partial [Echis carinatus sochureki]                                                                                    | P-II svMP                            | 2           | 13           | 29.9                 | 148.33               | 3258941.196                             | 0.00310076                           | 2.798E-05                           | SYDYDRY<br>NECDLTESTCTGQSAECPDHFHK<br>IPCSPEQVK                                                                                                                                                                                       | 2<br>3<br>2                                                        | 511.74<br>909.02<br>522.76                                                                                                                        |
|    |                                 |                    |          | ADI47577.1                           | metalloproteinase [Echis carinatus sochureki]                                                                                             | P-III svMP                           | 4           | 14           | 68.1                 | 144.15               | 100768571.1                             | 0.00958776                           | 8.652E-05                           | SYDYDRY<br>NECDLTESTCTGQSAECPDHFHK<br>IPCSPEQVK                                                                                                                                                                                       | 2<br>3<br>2                                                        | 511.74<br>909.02<br>522.76                                                                                                                        |
|    |                                 |                    |          | CAA55566.1                           | metalloprotease, partial [Echis pyramidum]                                                                                                | P-III svMP                           | 2           | 6            | 61.9                 | 14.26                | 308444222.1                             | 0.02934735                           | 0.0002648                           | KENDVPVPCAQEDVK                                                                                                                                                                                                                       | 2                                                                  | 871.42                                                                                                                                            |
|    |                                 |                    |          | ADI47643.1                           | metalloproteinase [Echis coloratus]                                                                                                       | P-III svMP                           | 2           | 7            | 69.3                 | 11.75                | 916197.625                              | 8.7173E-05                           | 7.866E-07                           | KIPCAPQDVK<br>SVGLVQDHSHTNLR                                                                                                                                                                                                          | 2<br>3                                                             | 578.31<br>509.6                                                                                                                                   |
|    |                                 |                    |          | CAQ72894.1                           | L-amino oxidase [Echis ocellatus]                                                                                                         | LAAO                                 | 3           | 5            | 56.5                 | 10.14                | 3655868.313                             | 0.00034784                           | 3.139E-06                           | AVEELKR<br>FWEDDGIQGGK<br>KFWEDDGIQGGK                                                                                                                                                                                                | 2<br>2<br>3                                                        | 422.7473<br>626.2846<br>460.558                                                                                                                   |
|    |                                 |                    |          | ADI47552.1                           | serine protease, partial [Echis coloratus]                                                                                                | svSP                                 | 2           | 7            | 28.3                 | 8.29                 | 11907033.25                             | 0.00113291                           | 1.022E-05                           | WDKDMLIK<br>ETYFCLPSR                                                                                                                                                                                                                 | 2                                                                  | 581.32                                                                                                                                            |
|    |                                 |                    |          | ANT80539.1                           | venom metalloprotease PIII-SVMP EOC00089 [Echis ocellatus]                                                                                | P-III svMP                           | 2           | 5            | 68.4                 | 5.36                 | 15137733.38                             | 0.0014403                            | 1.3E-05                             | ENDVEIPCAPEDVK                                                                                                                                                                                                                        | 2                                                                  | 807.87                                                                                                                                            |
|    |                                 |                    |          | Q7T248.2                             | Snaclec echicetin subunit alpha                                                                                                           | Snaclecs                             | 2           | 11           | 15.7                 | 3.85                 | 2999150.625                             | 0.00028536                           | 2.575E-06                           | SYEIAIR<br>IWTGLSER<br>TLCAGILR<br>AAFGRLLPAQSR                                                                                                                                                                                       | 2<br>2<br>2<br>2                                                   | 426.2341<br>481.258<br>452.2591<br>587.8144                                                                                                       |
|    |                                 |                    |          | ADE45140.1                           | serine protease, partial [Echis ocellatus]                                                                                                | svSP                                 | 2           | 7            | 28.2                 | 1.62                 | 21423258.5                              | 0.00203835                           | 1.839E-05                           | AAFGRLLPAQSR                                                                                                                                                                                                                          | 2                                                                  | 587.8144                                                                                                                                          |
| 22 | 120, 56,<br>30,27,25,<br>and 23 | 56,16,14<br>and 12 | 0.011608 | ADI47580.1                           | metalloproteinase [Echis carinatus sochureki]                                                                                             | P-III svMP                           | 7           | 24           | 68.2                 | 190.97               | 9144451081                              | 0.78555508                           | 0.0091187                           | HPYGDGEMVEPGTK<br><br>LFCETEPNMCR<br>YNDLTAMR<br>VYEMINTVNEIYMHIR<br>VIVVDHSMCTK<br>AHISSMCOATR<br>IRPSRTDIVSPOVCGNGLLEK<br>KENDVPVPCAQEDVK<br>ENDVPVPCAQEDVK<br>RGERDFYCR<br>VSDLLNRK<br>YLLKYKPK<br>CILDPLRK<br>CILDPLR<br>GMVEPGTK | 2<br>2<br>3<br>3<br>3<br>3<br>3<br>2<br>2<br>2<br>2<br>2<br>2<br>2 | 766.84<br>728.8<br>557.75<br>773.05<br>468.57<br>426.53<br>781.08<br>576.61<br>800.37<br>631.27<br>472.78<br>526.83<br>556.32<br>492.27<br>417.71 |
|    |                                 |                    |          | ADI47581.1                           | metalloproteinase [Echis carinatus sochureki]                                                                                             | P-III svMP                           | 3           | 14           | 69.8                 | 146.27               | 79344376.08                             | 0.00681609                           | 7.912E-05                           | VSDLLNRK<br>YLLKYKPK<br>CILDPLRK<br>CILDPLR<br>GMVEPGTK                                                                                                                                                                               | 2<br>2<br>2<br>2<br>2                                              | 472.78<br>526.83<br>556.32<br>492.27<br>417.71                                                                                                    |
|    |                                 |                    |          | JAC96580.1                           | L-amino acid oxidase B variant 1 [Echis coloratus]                                                                                        | LAAO                                 | 4           | 26           | 56.7                 | 74.02                | 364685051.6                             | 0.03132831                           | 0.0003637                           | IFLTCTK<br>STTDLPSR<br>YDTYSTK<br>HDDIFAYEYKR<br>DIVVVGAGMSGLSAAVYLAGAGHK<br>EADYEEFLEIAR<br>VTVLEASER<br>EANLSPGAVDMIGDLLNEDSGYVVSFIESLK                                                                                             | 2<br>2<br>2<br>3<br>3<br>2<br>2<br>2<br>3                          | 441.74<br>438.72<br>439.2<br>431.88<br>748.4<br>742.85<br>502.27<br>1121.9                                                                        |

|    |                                   |                    |          |            |                                                           |            |    |    |      |        |             |            |           |                                                                                                                                                                                                                                                                                 |                                                                                        |                                                                                                                                                                      |
|----|-----------------------------------|--------------------|----------|------------|-----------------------------------------------------------|------------|----|----|------|--------|-------------|------------|-----------|---------------------------------------------------------------------------------------------------------------------------------------------------------------------------------------------------------------------------------------------------------------------------------|----------------------------------------------------------------------------------------|----------------------------------------------------------------------------------------------------------------------------------------------------------------------|
|    |                                   |                    |          | ADI47590.1 | metalloproteinase [Echis carinatus sochureki]             | P-III svMP | 3  | 10 | 69.5 | 60.75  | 1577576424  | 0.13552188 | 0.0015731 | FDEIVGGMDRLPTSMYRAIEK<br>YDYSEDPNYGMVDEGTK<br>VPLVGMFEFWNOR<br>TDIVSPPVCGNALLEK                                                                                                                                                                                                 | 3<br>2<br>2<br>2                                                                       | 810.72<br>991.9<br>746.87<br>856.95                                                                                                                                  |
|    |                                   |                    |          | CAQ72894.1 | L-amino oxidase [Echis ocellatus]                         | LAAO       | 3  | 15 | 56.5 | 68.44  | 109708281   | 0.0094245  | 0.0001094 | IFLTCTK<br>AVEELKR<br>FWEDDGIQGGK<br>KFWEDDGIQGGK                                                                                                                                                                                                                               | 2<br>2<br>2<br>2                                                                       | 441.74<br>422.75<br>626.29<br>690.33                                                                                                                                 |
|    |                                   |                    |          | ADI47643.1 | metalloproteinase [Echis coloratus]                       | P-III svMP | 2  | 8  | 69.3 | 46.13  | 20144906.03 | 0.00173055 | 2.009E-05 | KIPCAPQDVK<br>LYCLDNSPGNK<br>SVGLVQDHSHTNLR                                                                                                                                                                                                                                     | 2<br>2<br>2                                                                            | 578.31<br>640.8<br>763.9                                                                                                                                             |
|    |                                   |                    |          | ADI47596.1 | metalloproteinase, partial [Echis carinatus sochureki]    | P-III svMP | 2  | 18 | 30.8 | 57.82  | 8309961.563 | 0.00071387 | 8.287E-06 | HPYGDGEMVEPGTK<br>TDIISPPVCGNELLEK                                                                                                                                                                                                                                              | 2<br>2                                                                                 | 766.84<br>892.96                                                                                                                                                     |
|    |                                   |                    |          | ADI47568.1 | serine protease, partial [Echis coloratus]                | svSP       | 4  | 6  | 25.4 | 22.25  | 20710889.5  | 0.00177917 | 2.065E-05 | VLNEDEETREP<br>VLNEDEETR<br>KVLNEDEETREP<br>KVLNEDEETR                                                                                                                                                                                                                          | 3<br>2<br>3<br>2                                                                       | 486.91<br>552.76<br>529.61<br>616.81                                                                                                                                 |
|    |                                   |                    |          | ADI47604.1 | metalloproteinase, partial [Echis carinatus sochureki]    | P-III svMP | 2  | 20 | 27.8 | 28.62  | 173951148.6 | 0.01494329 | 0.0001735 | LKPAGTECR<br>TDIVSPPVCGNDLLER<br>GDFYCR<br>TPCAPEDVK<br>LFCDIGPNNR<br>WRLSDDLNR                                                                                                                                                                                                 | 2<br>3<br>2<br>2<br>2<br>2                                                             | 516.27<br>595.63<br>409.17<br>508.74<br>546.27<br>665.86                                                                                                             |
|    |                                   |                    |          | ADI47586.1 | metalloproteinase [Echis carinatus sochureki]             | P-III svMP | 2  | 11 | 69.1 | 20.75  | 5490947.594 | 0.0004717  | 5.475E-06 | WRLSDDLNR                                                                                                                                                                                                                                                                       | 2                                                                                      | 665.86                                                                                                                                                               |
|    |                                   |                    |          | CAJ01683.1 | group III snake venom metalloproteinase [Echis ocellatus] | P-III svMP | 2  | 4  | 71.7 | 10.4   | 17120321.13 | 0.00147072 | 1.707E-05 | TDIVSPPVCGNDLLEK                                                                                                                                                                                                                                                                | 2                                                                                      | 878.9446                                                                                                                                                             |
|    |                                   |                    |          | ADI47593.1 | metalloproteinase, partial [Echis carinatus sochureki]    | P-III svMP | 3  | 10 | 28.3 | 4.55   | 39535374.13 | 0.00339629 | 3.942E-05 | CIFDPLLR<br>EIGSYGRRRFPAPQDVK                                                                                                                                                                                                                                                   | 2<br>3                                                                                 | 509.26<br>660.66                                                                                                                                                     |
|    |                                   |                    |          | Q7T248.2   | Snaclec echicetin subunit alpha                           | Snaclecs   | 2  | 11 | 15.7 | 7.37   | 4294023.813 | 0.00036888 | 4.282E-06 | IWTGLSER<br>SVEAIR                                                                                                                                                                                                                                                              | 2                                                                                      | 481.2584<br>426.2399                                                                                                                                                 |
|    |                                   |                    |          | ADE45140.1 | serine protease, partial [Echis ocellatus]                | svSP       | 2  | 14 | 28.2 | 1.99   | 75428241.38 | 0.00647967 | 7.522E-05 | AAFGRPLPAQSR<br>TLCAGILR<br>SSPHIAPISLPSNPPR                                                                                                                                                                                                                                    | 2<br>2<br>3                                                                            | 587.815<br>452.2577<br>557.6374                                                                                                                                      |
| 24 | 56,30,27,25,<br>and 23            | 56,16,14<br>and 12 | 0.041304 | JAC96580.1 | L-amino acid oxidase B variant 1 [Echis coloratus]        | LAAO       | 5  | 30 | 56.7 | 763.88 | 5093839441  | 0.73396181 | 0.0303156 | IFLTCTKK<br><br>INFKPLPPK<br>STTDLPSR<br>IFLTCTK<br>HDDIFAYEKR<br>RINFKPLPPK<br>HDDIFAYEK<br>NPLEECFR<br>DIVVVGAGMSGLSAAVYLAGAGHK<br>YDTYSTK<br>YDTYSTKEYLIK<br>SGTKIFLTCTK<br>VTVLEASER<br>EADYEEFLFIAR<br>IYFAGEYITANAHGWIDSTIK<br>FDEIVGGMDRLPTSMYRAIEK                      | 2<br>2<br>2<br>3<br>2<br>3<br>2<br>3<br>2<br>2<br>2<br>3<br>2<br>2<br>3<br>3<br>3<br>3 | 505.79<br>576.34<br>438.72<br>441.74<br>431.88<br>436.6<br>569.26<br>532.74<br>753.73<br>439.2<br>508.59<br>628.34<br>502.28<br>742.85<br>753.03<br>810.73           |
|    |                                   |                    |          | CAQ72894.1 | L-amino oxidase [Echis ocellatus]                         | LAAO       | 3  | 21 | 56.5 | 772.07 | 1121056837  | 0.16153099 | 0.0066719 | IFLTCTKK<br>AVEELKR<br>KFWEDDGIQGGK<br>FWEDDGIQGGK<br>KIPCAPQDVK<br>SVGLVQDHSHTNLR<br>LYCLDNSPGNK                                                                                                                                                                               | 2<br>2<br>2<br>2<br>2<br>2<br>2                                                        | 505.79<br>422.75<br>690.33<br>626.29<br>578.31<br>763.9<br>640.8                                                                                                     |
|    |                                   |                    |          | ADI47643.1 | metalloproteinase [Echis coloratus]                       | P-III svMP | 2  | 7  | 69.3 | 26.65  | 339825997   | 0.04896489 | 0.0020224 | KIPCAPQDVK<br>SVGLVQDHSHTNLR<br>LYCLDNSPGNK                                                                                                                                                                                                                                     | 2<br>2<br>2                                                                            | 578.31<br>763.9<br>640.8                                                                                                                                             |
|    |                                   |                    |          | ADI47580.1 | metalloproteinase [Echis carinatus sochureki]             | P-III svMP | 2  | 6  | 68.2 | 32.36  | 238429078.3 | 0.0343548  | 0.001419  | HPYGDGEMVEPGTK<br>YNDLTAMR<br>VIVVDHSMCTK                                                                                                                                                                                                                                       | 3<br>2<br>3                                                                            | 511.56<br>557.74<br>468.57                                                                                                                                           |
|    |                                   |                    |          | ADW54339.1 | group III snake venom metalloproteinase [Echis ocellatus] | P-III svMP | 2  | 5  | 72.8 | 15.68  | 5546145.656 | 0.00079913 | 3.301E-05 | TLDSFGVEWR<br>ANEEDKGMVDEGTK<br>LGNTYAYCR                                                                                                                                                                                                                                       | 2<br>2<br>2                                                                            | 555.76<br>762.33<br>559.26                                                                                                                                           |
|    |                                   |                    |          | ADI47581.1 | metalloproteinase [Echis carinatus sochureki]             | P-III svMP | 2  | 6  | 70.3 | 11.69  | 133682166.1 | 0.01926201 | 0.0007956 | KIPCAPQDVK<br>VSDLLNR<br>ATVAEDSCFOENLK                                                                                                                                                                                                                                         | 2<br>2<br>2                                                                            | 578.31<br>408.73<br>806.37                                                                                                                                           |
|    |                                   |                    |          | ADI47552.1 | serine protease, partial [Echis coloratus]                | svSP       | 2  | 7  | 28.3 | 5.2    | 7817181.625 | 0.00112636 | 4.652E-05 | WDKIMLIK<br>ETYFCLPSR                                                                                                                                                                                                                                                           | 2<br>2                                                                                 | 581.3217<br>586.7736                                                                                                                                                 |
| 25 | 120,70,56,3<br>0,27,25, and<br>23 | 56,16,14<br>and 12 | 0.01663  | JAC96580.1 | L-amino acid oxidase B variant 1 [Echis coloratus]        | LAAO       | 36 | 54 | 56.7 | 168    | 2251129057  | 0.18016118 | 0.0029961 | HDDIFAYEKR<br><br>HDDIFAYEK<br>IFLTCTKK<br>YDTYSTKEYLIK<br>YDTYSTK<br>IFLTCTK<br>NPLEECFR<br>INFKPLPPK<br>STTDLPSR<br>DIVVVGAGMSGLSAAVYLAGAGHK<br>SGTKIFLTCTK<br>VTVLEASER<br>FDEIVGGMDRLPTSMYRAIEK<br>EANLSPGAVDMIGDLLNEDSGYVVSFIESLK<br>EADYEEFLFIAR<br>KVCINGK<br>LFCETPNMCR | 3<br>2<br>3<br>2<br>2<br>2<br>2<br>2<br>3<br>3<br>3<br>3<br>3<br>3<br>2<br>2<br>2      | 431.88<br>569.26<br>505.79<br>508.59<br>439.2<br>441.74<br>532.74<br>576.34<br>438.72<br>748.4<br>419.23<br>502.27<br>821.38<br>1121.5<br>742.85<br>410.22<br>728.81 |
|    |                                   |                    |          | ADI47580.1 | metalloproteinase [Echis carinatus sochureki]             | P-III svMP | 26 | 44 | 68.2 | 101.77 | 949128009.2 | 0.07596012 | 0.0012632 |                                                                                                                                                                                                                                                                                 | 2                                                                                      | 728.81                                                                                                                                                               |

|            |                                                                     |            |    |     |      |        |             |            |           |                                                                                                                                                                                                                                                                                                                       |                                                                                             |                                                                                                                                                                                                      |
|------------|---------------------------------------------------------------------|------------|----|-----|------|--------|-------------|------------|-----------|-----------------------------------------------------------------------------------------------------------------------------------------------------------------------------------------------------------------------------------------------------------------------------------------------------------------------|---------------------------------------------------------------------------------------------|------------------------------------------------------------------------------------------------------------------------------------------------------------------------------------------------------|
| AD147643.1 | metalloproteinase [Echis coloratus]                                 | P-III svMP | 28 | 27  | 69.3 | 89.79  | 577531249.3 | 0.04622068 | 0.0007686 | HPYGDGEMVEPGTK<br>YPCCDAASCK<br>LHSWVECESGECDCQCR<br>AHISSMCQATR<br>YNDLFTAMR<br>VIVVDHSMCTK<br>ENDVVPVCAQEDVK<br>GERDFYCR<br>KENDVVPVCAQEDVK<br>IRPSRTDIVSPQVCGNGLLEK<br>KIPCAPQDVK<br>SVGLVQDHSSTNLR<br>CMLDPPFR<br>YCTCEDYPCIMSAVLSPSR<br>LYCLDNSPGNKNPK<br>HECDLPEHCTGQSAECPIDEFOR<br>LYCLDNSPGNK<br>LFSNGSYQDYQK | 2<br>2<br>2<br>2<br>2<br>2<br>2<br>3<br>3<br>2<br>2<br>2<br>2<br>2<br>3<br>3<br>2<br>2      | 758.84<br>616.23<br>1106.4<br>631.29<br>549.26<br>694.36<br>800.37<br>551.74<br>576.61<br>781.08<br>578.8<br>763.9<br>526.24<br>1155<br>594.27<br>939.05<br>640.8<br>776.84                          |
| CAQ72894.1 | L-amino oxidase [Echis ocellatus]                                   | LAO        | 20 | 38  | 56.5 | 134.64 | 473575242.3 | 0.03790093 | 0.0006303 | HDDIFAYEKR<br>AVEELKR<br>FWEDDGIQGGK<br>KFWEDDGIQGGK<br>DSDQSKCIDNPKPK<br>SAECLDFVFOR<br>YCRNPCCDAATCK<br>YIELALIADNLIYR<br>KEHDNAQLVTGINFGQTLGRAPVSGMCSPIR<br>FKPAGTQCR<br>LFCVEPSTGNK                                                                                                                               | 3<br>2<br>2<br>2<br>2<br>2<br>2<br>2<br>3<br>2<br>2                                         | 431.88<br>422.75<br>626.29<br>690.33<br>824.41<br>661.31<br>838.82<br>841.46<br>1119.5<br>533.26<br>626.31                                                                                           |
| AD147584.1 | metalloproteinase [Echis carinatus sochureki]                       | P-III svMP | 23 | 101 | 69.3 | 61.98  | 4548750624  | 0.36404323 | 0.0006054 | VSDLLNR<br>ATVAEDSCFQENLK<br>CILDPPLRK<br>LYCLDSSR<br>KASDECDVPEYCTGQADPCPR<br>FRTAGTECR                                                                                                                                                                                                                              | 2<br>2<br>2<br>2<br>2<br>2                                                                  | 408.73<br>806.37<br>556.32<br>564.26<br>1223<br>549.26                                                                                                                                               |
| AD147581.1 | metalloproteinase [Echis carinatus sochureki]                       | P-III svMP | 14 | 22  | 68.7 | 50.55  | 303874669.5 | 0.02431954 | 0.0004044 | VCINGKCIDVNTAY<br>TDIISPPVCGNELLEK<br>GEECDGCSPENGQYPCDDAASCK<br>LFCQTEPNMCR                                                                                                                                                                                                                                          | 2<br>2<br>2<br>2                                                                            | 813.89<br>596.64<br>918.65<br>728.81                                                                                                                                                                 |
| AD147596.1 | metalloproteinase, partial [Echis carinatus sochureki]              | P-III svMP | 38 | 22  | 30.8 | 48.3   | 8216538.875 | 0.0006758  | 1.094E-05 | LYCSYNSFGNHISLPCYR<br>ADEEDKGMVDEGTK<br>FIEYLIVDHRMYVYKYNNDSTAIR<br>DPCDDAALCK                                                                                                                                                                                                                                        | 2<br>2<br>3<br>2                                                                            | 1206<br>762.33<br>991.85<br>605.24                                                                                                                                                                   |
| ADW54356.1 | group III snake venom metalloproteinase [Echis carinatus sochureki] | P-III svMP | 22 | 20  | 68.6 | 51.02  | 497554374.4 | 0.03982001 | 0.0006622 | LELENLIYLR<br>HSDSNFLHLFPESFR<br>GKLEENLIYLR<br>NDQLLWLWR<br>CPEIEMSR<br>ENFMCQCYQGWK<br>DLHPELSEDKIR<br>DLHPELSEDK<br>GMVDEGTK<br>TLDSFGWEV<br>CPITLYQCR<br>TDIISPPVCGNELLER<br>LGNTYA YCR<br>LFCDGPNR<br>TDIVSPPVCGNDLLER<br>LKPAGTECR<br>LHSWIECEFGECCQCR<br>GDFYCR<br>NENYVKTCPAEDVK<br>TPCAPEDVK                 | 2<br>2<br>2<br>2<br>2<br>2<br>2<br>2<br>2<br>2<br>3<br>2<br>2<br>2<br>2<br>2<br>2<br>2<br>2 | 638.37<br>635.31<br>730.93<br>622.33<br>511.22<br>825.83<br>726.38<br>591.79<br>418.69<br>555.77<br>605.79<br>604.98<br>559.75<br>546.27<br>595.63<br>516.27<br>1150.5<br>409.17<br>882.42<br>508.74 |
| ADW54339.1 | group III snake venom metalloproteinase [Echis ocellatus]           | P-III svMP | 11 | 20  | 72.9 | 51.07  | 440933953.5 | 0.0352886  | 0.0005868 | LELENLIYLR<br>HSDSNFLHLFPESFR<br>GKLEENLIYLR<br>NDQLLWLWR<br>ENDAKIPCAPEDVKCGR                                                                                                                                                                                                                                        | 2<br>2<br>2<br>2<br>3                                                                       | 638.3703<br>635.3067<br>730.9273<br>622.3328<br>653.97                                                                                                                                               |
| AD147604.1 | metalloproteinase, partial [Echis carinatus sochureki]              | P-III svMP | 40 | 16  | 27.8 | 42.81  | 338182369.3 | 0.02706523 | 0.0004501 | NECDLPEYCTGQSAECPIDRSHR<br>HDNAQLFTAIDISNTIGIAHVSSMCQATR<br>KENDVVEICAPEDVK                                                                                                                                                                                                                                           | 2<br>2<br>2<br>2<br>2<br>2<br>2<br>2<br>2<br>2<br>2                                         | 932.38<br>1092.2<br>581.61                                                                                                                                                                           |
| ABI33937.1 | hyaluronidase [Echis ocellatus]                                     | HYAL       | 15 | 11  | 52.5 | 36.41  | 1165902.875 | 9.3309E-05 | 1.552E-06 | ASDLLSHK<br>VYEMINTVNEIYYMDIR                                                                                                                                                                                                                                                                                         | 2<br>3                                                                                      | 435.74<br>765.71                                                                                                                                                                                     |
| AD147594.1 | metalloproteinase, partial [Echis carinatus sochureki]              | P-III svMP | 14 | 20  | 35.9 | 42.67  | 919931830.2 | 0.0736235  | 0.0012244 | RFPCAPQDVK<br>DDCDVPEHCTGQSAECPR<br>CSYDQYR<br>SCTCGANPCIMFSEVSEPTPK<br>LFCIEIVKNTCK<br>YDYSEDPDYGMVGGQTKCEDGK<br>TDIVSPPVCGNDILEQGECCDGSPEK                                                                                                                                                                          | 3<br>3<br>2<br>2<br>3<br>3<br>3                                                             | 406.54<br>711.61<br>496.2<br>791.34<br>471.57<br>844.01<br>1002.4                                                                                                                                    |
| CAJ01683.1 | Group III snake venom metalloproteinase [Echis ocellatus]           | P-III svMP | 16 | 14  | 69.6 | 33.09  | 33373184.14 | 0.00267091 | 4.442E-05 |                                                                                                                                                                                                                                                                                                                       |                                                                                             |                                                                                                                                                                                                      |
| ANT80539.1 | venom metalloprotease PIII-SVMP EOC00089 [Echis ocellatus]          | P-III svMP | 14 | 39  | 68.4 | 21.97  | 65912828.13 | 0.0052751  | 8.772E-05 |                                                                                                                                                                                                                                                                                                                       |                                                                                             |                                                                                                                                                                                                      |
| AD147595.1 | metalloproteinase, partial [Echis carinatus sochureki]              | P-II svMP  | 19 | 11  | 29.9 | 31.3   | 6755838.867 | 0.00054068 | 8.992E-06 |                                                                                                                                                                                                                                                                                                                       |                                                                                             |                                                                                                                                                                                                      |
| AD147593.1 | metalloproteinase, partial [Echis carinatus sochureki]              | P-III svMP | 22 | 6   | 28.3 | 20.34  | 11226370.13 | 0.00089846 | 1.494E-05 |                                                                                                                                                                                                                                                                                                                       |                                                                                             |                                                                                                                                                                                                      |
| ADW54348.1 | group III snake venom metalloproteinase [Echis ocellatus]           | P-III svMP | 13 | 15  | 69.4 | 26.75  | 477202796.5 | 0.03819124 | 0.0006351 |                                                                                                                                                                                                                                                                                                                       |                                                                                             |                                                                                                                                                                                                      |



|    |                            |                    |          |            |                                                                    |            |    |    |      |        |             |            |           |                                                                                                                                                                                                                                                                                                                                                                                                                                                                                                                                               |   |          |
|----|----------------------------|--------------------|----------|------------|--------------------------------------------------------------------|------------|----|----|------|--------|-------------|------------|-----------|-----------------------------------------------------------------------------------------------------------------------------------------------------------------------------------------------------------------------------------------------------------------------------------------------------------------------------------------------------------------------------------------------------------------------------------------------------------------------------------------------------------------------------------------------|---|----------|
|    |                            |                    |          | ADI47612.1 | metalloproteinase [Echis coloratus]                                | P-III svMP | 6  | 18 | 69.1 | 37.2   | 7773862.5   | 0.00062215 | 1.035E-05 | HCVDVNTAY<br>GQTLGRAPVSGMCSPK                                                                                                                                                                                                                                                                                                                                                                                                                                                                                                                 | 2 | 540.23   |
|    |                            |                    |          | ADI47552.1 | serine protease, partial [Echis coloratus]                         | svSP       | 20 | 9  | 28.3 | 18.77  | 412465118   | 0.03301019 | 0.000549  | WDKDMLIK<br>GDSGGPLICNGQIQGVSWGAK                                                                                                                                                                                                                                                                                                                                                                                                                                                                                                             | 2 | 831.89   |
|    |                            |                    |          | ADI47588.1 | metalloproteinase, partial [Echis carinatus sochurek]              | P-III svMP | 22 | 20 | 41.1 | 14.92  | 22959681.81 | 0.0018375  | 3.056E-05 | ETYFCLPSR<br>SECDMAEYCTGRSADCPDYFHR                                                                                                                                                                                                                                                                                                                                                                                                                                                                                                           | 3 | 589.32   |
|    |                            |                    |          | ADI47585.1 | metalloproteinase [Echis carinatus sochurek]                       | P-III svMP | 15 | 10 | 69.2 | 17.83  | 1047947.188 | 8.3869E-05 | 1.395E-06 | DHDNAQLLTGINLNGTIGYVSGMCMPK                                                                                                                                                                                                                                                                                                                                                                                                                                                                                                                   | 3 | 738.71   |
|    |                            |                    |          | ADI47626.1 | metalloproteinase [Echis coloratus]                                | P-III svMP | 10 | 7  | 68.8 | 9.3    | 76075277.13 | 0.00608842 | 0.0001013 | LFCEIVKNTCK<br>HCVDVTTAY<br>KGEEDFYCR                                                                                                                                                                                                                                                                                                                                                                                                                                                                                                         | 2 | 587.27   |
|    |                            |                    |          | ADI47725.1 | metalloproteinase, partial [Echis carinatus sochurek]              | P-II svMP  | 12 | 4  | 27.7 | 6.23   | 4100045.813 | 0.00032813 | 5.457E-06 | THDNAQLFTAIDLSPGTIGIAHVSSMCQATR                                                                                                                                                                                                                                                                                                                                                                                                                                                                                                               | 2 | 471.57   |
|    |                            |                    |          | ADI47586.1 | metalloproteinase [Echis carinatus sochurek]                       | P-III svMP | 7  | 10 | 69.1 | 8.85   | 7476113.875 | 0.00059832 | 9.95E-06  | KENDVPIPCAQEDIKCCR<br>DLINVVSSIDTLR<br>WRLSDLLNRR<br>IYEINLNAIYR                                                                                                                                                                                                                                                                                                                                                                                                                                                                              | 2 | 533.2361 |
|    |                            |                    |          | AAP41219.2 | echicetin B-chain [Echis carinatus]                                | Snaclecs   | 20 | 3  | 17.2 | 7.3    | 4478205.203 | 0.0003584  | 5.96E-06  | MNVADA EK<br>NDLWVIGLTDYWR<br>DGHVLSFR<br>ENDVMPCAPEDVK                                                                                                                                                                                                                                                                                                                                                                                                                                                                                       | 2 | 566.2493 |
|    |                            |                    |          | ADI47583.1 | metalloproteinase [Echis carinatus sochurek]                       | P-III svMP | 10 | 13 | 46.1 | 22.56  | 15387420    | 0.00123148 | 2.048E-05 | TWDEAEK<br>IWTGLSER<br>YSECFVLEK                                                                                                                                                                                                                                                                                                                                                                                                                                                                                                              | 2 | 766.4205 |
|    |                            |                    |          | Q7T248.2   | Snaclec echicetin subunit alpha                                    | Snaclecs   | 18 | 3  | 15.7 | 3.67   | 6930960.875 | 0.0005547  | 9.225E-06 | STDDLPSR                                                                                                                                                                                                                                                                                                                                                                                                                                                                                                                                      | 2 | 665.859  |
| 26 | 70.56,30,27,<br>25, and 23 | 56,16,14<br>and 12 | 0.028477 | JAC96580.1 | L-amino acid oxidase B variant 1 [Echis coloratus]                 | LA AO      | 7  | 34 | 56.7 | 165.91 | 1764543521  | 0.12857307 | 0.0036614 | HDDIFAYEK<br>HDDIFAYEKR<br>NPLEECFR<br>IFLTCTK<br>TSNPKDIVVVGAGMSGLSAAVYLAGAGHK<br>YDTYSTKEYLIK<br>YDTYSTK<br>DIVVVGAGMSGLSAAVYLAGAGHK<br>IYFAGEYATANAHGWIDSTIK<br>SGTKIFLTCTK<br>VTVLEASER<br>EANLSPGAVDMIGDLLNEDSGYVYFIESLK<br>EADYEEFLEIAR<br>FDEIVGGMDRLPTSMYRAIEK<br>STDDLPSR<br>VYFAGEYATANAHGWIDSTIK<br>AVEELKR<br>KFWEDDGIQGGK<br>FWEDDGIQGGK<br>LHSWVVEGSEGCCDQCR<br>HPYGDEGMVPEPTGK<br>LFCETEPNMCR<br>YPCDDAASCK<br>YNNDLTAMR<br>VIVVDHSMCTK<br>ENDVPVPCAQEDVK<br>AHISSMCOATR<br>KENDVPVPCAQEDVK<br>GERDFYCR<br>LYCSYNSFGNHISCLPCYR | 2 | 438.72   |
|    |                            |                    |          | CAQ72894.1 | L-amino oxidase [Echis ocellatus]                                  | LA AO      | 4  | 22 | 56.5 | 135.12 | 367984491   | 0.02681311 | 0.0007636 | CILDPPLRK<br>VSDLLNR<br>LYCLDNSSR<br>ATVAEDSCFQENLK<br>ASDECDVPEYCTGQSADCPR<br>KASDECDVPEYCTGQSADCPR                                                                                                                                                                                                                                                                                                                                                                                                                                          | 2 | 569.26   |
|    |                            |                    |          | ADI47580.1 | metalloproteinase [Echis carinatus sochurek]                       | P-III svMP | 4  | 18 | 68.2 | 84.24  | 1061481740  | 0.07734463 | 0.0022025 | LFCETEPNMCR<br>YPCDDAASCK<br>YNNDLTAMR<br>VIVVDHSMCTK<br>ENDVPVPCAQEDVK<br>AHISSMCOATR<br>KENDVPVPCAQEDVK<br>GERDFYCR<br>LYCSYNSFGNHISCLPCYR                                                                                                                                                                                                                                                                                                                                                                                                  | 3 | 532.74   |
|    |                            |                    |          | ADW54356.1 | group III snake venom metalloproteinase [Echis carinatus sochurek] | P-III svMP | 3  | 19 | 68.6 | 126.03 | 282295663.5 | 0.02056941 | 0.0005858 | CILDPPLRK<br>VSDLLNR<br>LYCLDNSSR<br>ATVAEDSCFQENLK<br>ASDECDVPEYCTGQSADCPR<br>KASDECDVPEYCTGQSADCPR                                                                                                                                                                                                                                                                                                                                                                                                                                          | 2 | 441.74   |
|    |                            |                    |          | ADI47581.1 | metalloproteinase [Echis carinatus sochurek]                       | P-III svMP | 5  | 13 | 68.7 | 40.86  | 701229497.6 | 0.05109493 | 0.001455  | LFCETEPNMCR<br>YPCDDAASCK<br>YNNDLTAMR<br>VIVVDHSMCTK<br>ENDVPVPCAQEDVK<br>AHISSMCOATR<br>KENDVPVPCAQEDVK<br>GERDFYCR<br>LYCSYNSFGNHISCLPCYR                                                                                                                                                                                                                                                                                                                                                                                                  | 3 | 924.16   |
|    |                            |                    |          | CAA55566.1 | metalloprotease, partial [Echis pyramidum]                         | P-III svMP | 4  | 8  | 61.9 | 52.71  | 545331441.5 | 0.03973545 | 0.0011315 | LFCETEPNMCR<br>KENDVPIPCAQEDVKCGR                                                                                                                                                                                                                                                                                                                                                                                                                                                                                                             | 2 | 762.38   |
|    |                            |                    |          | ABI33937.1 | hyaluronidase [Echis ocellatus]                                    | HYAL       | 2  | 15 | 52.5 | 56.26  | 4199401.375 | 0.00030599 | 8.714E-06 | GKLELENLIYLR<br>NDQLLWLWR<br>HSDSN AFLHLFPESFR<br>KHSDSN AFLHLFPESFR<br>LELENLIYLR<br>TFHGLGVIDWENWRPQWDR                                                                                                                                                                                                                                                                                                                                                                                                                                     | 2 | 439.25   |
|    |                            |                    |          | ABI33941.1 | hyaluronidase [Echis pyramidum leakeyi]                            | HYAL       | 3  | 15 | 52.7 | 54.5   | 55909937.28 | 0.00407386 | 0.000116  | GKLELENLIYLR<br>DLHPPELSEDK<br>CPEIEMSR<br>ENFMCCCYQGWK<br>LHSWVVEGSEGCCDQCR                                                                                                                                                                                                                                                                                                                                                                                                                                                                  | 2 | 748.68   |
|    |                            |                    |          | ADW54339.1 | group III snake venom metalloproteinase [Echis ocellatus]          | P-III svMP | 3  | 13 | 72.9 | 88.36  | 7763119215  | 0.56565793 | 0.0161082 | LFSNCSSEIQYER<br>TLDSFGIEWR<br>CPITLYQCR<br>LGNTYAYCR<br>ANEEDKGMVDEGTK                                                                                                                                                                                                                                                                                                                                                                                                                                                                       | 2 | 421.2    |
|    |                            |                    |          | ADI47654.1 | metalloproteinase, partial [Echis coloratus]                       | P-III svMP | 2  | 23 | 55.1 | 81.97  | 23378568    | 0.00170347 | 4.851E-05 | CPITLYQCR                                                                                                                                                                                                                                                                                                                                                                                                                                                                                                                                     | 2 | 576.61   |
|    |                            |                    |          |            |                                                                    |            |    |    |      |        |             |            |           |                                                                                                                                                                                                                                                                                                                                                                                                                                                                                                                                               | 2 | 1206.012 |
|    |                            |                    |          |            |                                                                    |            |    |    |      |        |             |            |           |                                                                                                                                                                                                                                                                                                                                                                                                                                                                                                                                               | 2 | 556.3173 |
|    |                            |                    |          |            |                                                                    |            |    |    |      |        |             |            |           |                                                                                                                                                                                                                                                                                                                                                                                                                                                                                                                                               | 2 | 408.7309 |
|    |                            |                    |          |            |                                                                    |            |    |    |      |        |             |            |           |                                                                                                                                                                                                                                                                                                                                                                                                                                                                                                                                               | 2 | 564.7527 |
|    |                            |                    |          |            |                                                                    |            |    |    |      |        |             |            |           |                                                                                                                                                                                                                                                                                                                                                                                                                                                                                                                                               | 2 | 806.3662 |
|    |                            |                    |          |            |                                                                    |            |    |    |      |        |             |            |           |                                                                                                                                                                                                                                                                                                                                                                                                                                                                                                                                               | 3 | 772.9654 |
|    |                            |                    |          |            |                                                                    |            |    |    |      |        |             |            |           |                                                                                                                                                                                                                                                                                                                                                                                                                                                                                                                                               | 2 | 1223.002 |
|    |                            |                    |          |            |                                                                    |            |    |    |      |        |             |            |           |                                                                                                                                                                                                                                                                                                                                                                                                                                                                                                                                               | 2 | 728.81   |
|    |                            |                    |          |            |                                                                    |            |    |    |      |        |             |            |           |                                                                                                                                                                                                                                                                                                                                                                                                                                                                                                                                               | 3 | 706      |
|    |                            |                    |          |            |                                                                    |            |    |    |      |        |             |            |           |                                                                                                                                                                                                                                                                                                                                                                                                                                                                                                                                               | 2 | 730.93   |
|    |                            |                    |          |            |                                                                    |            |    |    |      |        |             |            |           |                                                                                                                                                                                                                                                                                                                                                                                                                                                                                                                                               | 2 | 622.83   |
|    |                            |                    |          |            |                                                                    |            |    |    |      |        |             |            |           |                                                                                                                                                                                                                                                                                                                                                                                                                                                                                                                                               | 3 | 635.31   |
|    |                            |                    |          |            |                                                                    |            |    |    |      |        |             |            |           |                                                                                                                                                                                                                                                                                                                                                                                                                                                                                                                                               | 3 | 678      |
|    |                            |                    |          |            |                                                                    |            |    |    |      |        |             |            |           |                                                                                                                                                                                                                                                                                                                                                                                                                                                                                                                                               | 2 | 638.37   |
|    |                            |                    |          |            |                                                                    |            |    |    |      |        |             |            |           |                                                                                                                                                                                                                                                                                                                                                                                                                                                                                                                                               | 3 | 804.73   |
|    |                            |                    |          |            |                                                                    |            |    |    |      |        |             |            |           |                                                                                                                                                                                                                                                                                                                                                                                                                                                                                                                                               | 2 | 730.93   |
|    |                            |                    |          |            |                                                                    |            |    |    |      |        |             |            |           |                                                                                                                                                                                                                                                                                                                                                                                                                                                                                                                                               | 2 | 591.79   |
|    |                            |                    |          |            |                                                                    |            |    |    |      |        |             |            |           |                                                                                                                                                                                                                                                                                                                                                                                                                                                                                                                                               | 2 | 511.23   |
|    |                            |                    |          |            |                                                                    |            |    |    |      |        |             |            |           |                                                                                                                                                                                                                                                                                                                                                                                                                                                                                                                                               | 3 | 825.83   |
|    |                            |                    |          |            |                                                                    |            |    |    |      |        |             |            |           |                                                                                                                                                                                                                                                                                                                                                                                                                                                                                                                                               | 3 | 737.95   |
|    |                            |                    |          |            |                                                                    |            |    |    |      |        |             |            |           |                                                                                                                                                                                                                                                                                                                                                                                                                                                                                                                                               | 2 | 773.36   |
|    |                            |                    |          |            |                                                                    |            |    |    |      |        |             |            |           |                                                                                                                                                                                                                                                                                                                                                                                                                                                                                                                                               | 2 | 555.76   |
|    |                            |                    |          |            |                                                                    |            |    |    |      |        |             |            |           |                                                                                                                                                                                                                                                                                                                                                                                                                                                                                                                                               | 2 | 605.79   |
|    |                            |                    |          |            |                                                                    |            |    |    |      |        |             |            |           |                                                                                                                                                                                                                                                                                                                                                                                                                                                                                                                                               | 2 | 559.26   |
|    |                            |                    |          |            |                                                                    |            |    |    |      |        |             |            |           |                                                                                                                                                                                                                                                                                                                                                                                                                                                                                                                                               | 2 | 770.33   |
|    |                            |                    |          |            |                                                                    |            |    |    |      |        |             |            |           |                                                                                                                                                                                                                                                                                                                                                                                                                                                                                                                                               | 2 | 605.7895 |



|    |                                      |                                 |          |            |                                                                     |            |    |    |      |        |             |            |           |                                        |   |        |
|----|--------------------------------------|---------------------------------|----------|------------|---------------------------------------------------------------------|------------|----|----|------|--------|-------------|------------|-----------|----------------------------------------|---|--------|
| 28 | 120,70,56,4<br>3,30,27,25,<br>and 23 | 56,43,30,16,<br>14 and<br>12,10 | 0.029205 | JAC96580.1 | L-amino acid oxidase B variant 1 [Echis coloratus]                  | LAAO       | 12 | 41 | 56.7 | 589.68 | 4334225710  | 0.19882841 | 0.0058068 | IFLTCTK                                | 2 | 441.74 |
|    |                                      |                                 |          |            |                                                                     |            |    |    |      |        |             |            |           | RINFKPPLPPK                            | 3 | 436.6  |
|    |                                      |                                 |          |            |                                                                     |            |    |    |      |        |             |            |           | HDDIFAYEK                              | 3 | 431.88 |
|    |                                      |                                 |          |            |                                                                     |            |    |    |      |        |             |            |           | IFLTCTK                                | 2 | 505.79 |
|    |                                      |                                 |          |            |                                                                     |            |    |    |      |        |             |            |           | STTDLPSR                               | 2 | 438.72 |
|    |                                      |                                 |          |            |                                                                     |            |    |    |      |        |             |            |           | INFKPPLPPK                             | 2 | 576.34 |
|    |                                      |                                 |          |            |                                                                     |            |    |    |      |        |             |            |           | TSNPKDIVVVGAGMSGLSAAAYVLGAGHK          | 3 | 924.16 |
|    |                                      |                                 |          |            |                                                                     |            |    |    |      |        |             |            |           | HDDIFAYEK                              | 2 | 569.26 |
|    |                                      |                                 |          |            |                                                                     |            |    |    |      |        |             |            |           | YDYSTK                                 | 2 | 439.2  |
|    |                                      |                                 |          |            |                                                                     |            |    |    |      |        |             |            |           | YDYSTKEYLIK                            | 2 | 762.38 |
|    |                                      |                                 |          |            |                                                                     |            |    |    |      |        |             |            |           | DIVVVGAGMSGLSAAAYVLGAGHK               | 3 | 748.4  |
|    |                                      |                                 |          |            |                                                                     |            |    |    |      |        |             |            |           | NPLEECFR                               | 2 | 532.74 |
|    |                                      |                                 |          |            |                                                                     |            |    |    |      |        |             |            |           | NTKEGWYANLGPMPRIEK                     | 3 | 708.01 |
|    |                                      |                                 |          |            |                                                                     |            |    |    |      |        |             |            |           | SGTKIFLTCTK                            | 2 | 628.34 |
|    |                                      |                                 |          |            |                                                                     |            |    |    |      |        |             |            |           | NTKEGWYANLGPMP                         | 2 | 619.88 |
|    |                                      |                                 |          |            |                                                                     |            |    |    |      |        |             |            |           | VTVLEASER                              | 2 | 502.27 |
|    |                                      |                                 |          |            |                                                                     |            |    |    |      |        |             |            |           | FDEIVGGMDRLPTSMYRAIEK                  | 2 | 1215.6 |
|    |                                      |                                 |          |            |                                                                     |            |    |    |      |        |             |            |           | EADYEEFLEIAR                           | 2 | 742.85 |
|    |                                      |                                 |          |            |                                                                     |            |    |    |      |        |             |            |           | EADYEEFLEIARNGLK                       | 3 | 633.31 |
|    |                                      |                                 |          |            |                                                                     |            |    |    |      |        |             |            |           | EANLSPGAVDMIGDLLNEDSGYVYVFIESLK        | 3 | 1116.2 |
|    |                                      |                                 |          |            |                                                                     |            |    |    |      |        |             |            |           | IYFAGEYTANAHGWIDSTIK                   | 3 | 753.04 |
|    |                                      |                                 |          | ADI47643.1 | metalloproteinase [Echis coloratus]                                 | P-III svMP | 10 | 21 | 69.3 | 241.04 | 1863211996  | 0.08547305 | 0.0024962 | KIPCAPQDVK                             | 2 | 578.81 |
|    |                                      |                                 |          |            |                                                                     |            |    |    |      |        |             |            |           | NGEPCLNLLGCGYNDGCPIMTNQCISLFGSR        | 3 | 1209.2 |
|    |                                      |                                 |          |            |                                                                     |            |    |    |      |        |             |            |           | SVGLVQDHSHTNLR                         | 3 | 509.93 |
|    |                                      |                                 |          |            |                                                                     |            |    |    |      |        |             |            |           | YCTCEDYPCIMSAVLSPSR                    | 2 | 1155   |
|    |                                      |                                 |          |            |                                                                     |            |    |    |      |        |             |            |           | HECDLPEHCTGQSAECPIDEFQR                | 3 | 939.05 |
|    |                                      |                                 |          |            |                                                                     |            |    |    |      |        |             |            |           | CMLDPPFR                               | 2 | 518.24 |
|    |                                      |                                 |          |            |                                                                     |            |    |    |      |        |             |            |           | CMLDPPFRK                              | 2 | 590.29 |
|    |                                      |                                 |          |            |                                                                     |            |    |    |      |        |             |            |           | LYCLDNSPGNKNPCK                        | 2 | 890.41 |
|    |                                      |                                 |          |            |                                                                     |            |    |    |      |        |             |            |           | KYCTCEDYPCIMSAVLSPSR                   | 2 | 1219   |
|    |                                      |                                 |          | CAQ72894.1 | L-amino oxidase [Echis ocellatus]                                   | LAAO       | 3  | 21 | 56.5 | 513.18 | 978767340.4 | 0.04490001 | 0.0013113 | IFLTCTK                                | 2 | 441.74 |
|    |                                      |                                 |          |            |                                                                     |            |    |    |      |        |             |            |           | FWEDDGIQGGK                            | 2 | 626.29 |
|    |                                      |                                 |          |            |                                                                     |            |    |    |      |        |             |            |           | AVEELKR                                | 2 | 422.75 |
|    |                                      |                                 |          |            |                                                                     |            |    |    |      |        |             |            |           | KFWEDDGIQGGK                           | 2 | 690.33 |
|    |                                      |                                 |          | ADI47580.1 | metalloproteinase [Echis carinatus sochureki]                       | P-III svMP | 4  | 23 | 68.2 | 199.21 | 1245968726  | 0.05715761 | 0.0016693 | LFCETEPNMCR                            | 2 | 728.8  |
|    |                                      |                                 |          |            |                                                                     |            |    |    |      |        |             |            |           | KVCINGKCTDVNTAY                        | 2 | 871.91 |
|    |                                      |                                 |          |            |                                                                     |            |    |    |      |        |             |            |           | LHSWVECEGECDCOQR                       | 3 | 737.95 |
|    |                                      |                                 |          |            |                                                                     |            |    |    |      |        |             |            |           | HPYGDEGMVEPGTK                         | 3 | 511.56 |
|    |                                      |                                 |          |            |                                                                     |            |    |    |      |        |             |            |           | YENIEKEDEAPK                           | 3 | 488.9  |
|    |                                      |                                 |          |            |                                                                     |            |    |    |      |        |             |            |           | YNNDLTAMR                              | 2 | 549.26 |
|    |                                      |                                 |          |            |                                                                     |            |    |    |      |        |             |            |           | VIVVVDHSMCTK                           | 2 | 702.35 |
|    |                                      |                                 |          |            |                                                                     |            |    |    |      |        |             |            |           | TDIVSPOVCGNGLLEK                       | 2 | 866.43 |
|    |                                      |                                 |          |            |                                                                     |            |    |    |      |        |             |            |           | AHISSMCOATR                            | 3 | 421.2  |
|    |                                      |                                 |          |            |                                                                     |            |    |    |      |        |             |            |           | KENDVPVPCAQEDVK                        | 3 | 576.61 |
|    |                                      |                                 |          | JAC96587.1 | Phospholipase B [Echis coloratus]                                   | PLB        | 14 | 27 | 64.5 | 102.81 | 149609631.1 | 0.0068632  | 0.0002004 | QVVPESLFAWER                           | 2 | 730.88 |
|    |                                      |                                 |          |            |                                                                     |            |    |    |      |        |             |            |           | VLPGYENIFAHSSWFTYAATLR                 | 3 | 902.79 |
|    |                                      |                                 |          |            |                                                                     |            |    |    |      |        |             |            |           | VTDMESMK                               | 2 | 470.71 |
|    |                                      |                                 |          |            |                                                                     |            |    |    |      |        |             |            |           | YNNYKEDPYTK                            | 2 | 717.83 |
|    |                                      |                                 |          |            |                                                                     |            |    |    |      |        |             |            |           | TWAQIFEK                               | 2 | 511.77 |
|    |                                      |                                 |          |            |                                                                     |            |    |    |      |        |             |            |           | ENSGTYNNQYMILDTK                       | 2 | 945.93 |
|    |                                      |                                 |          |            |                                                                     |            |    |    |      |        |             |            |           | ENSGTYNNQYMILDTKK                      | 3 | 673.65 |
|    |                                      |                                 |          |            |                                                                     |            |    |    |      |        |             |            |           | HGYWPSYNIPFHK                          | 3 | 549.27 |
|    |                                      |                                 |          |            |                                                                     |            |    |    |      |        |             |            |           | HQSLPESYNFDFVTMKPVL                    | 2 | 1126.6 |
|    |                                      |                                 |          |            |                                                                     |            |    |    |      |        |             |            |           | YSDQTEVLR                              | 2 | 555.78 |
|    |                                      |                                 |          |            |                                                                     |            |    |    |      |        |             |            |           | ITDPQTK                                | 2 | 401.72 |
|    |                                      |                                 |          |            |                                                                     |            |    |    |      |        |             |            |           | LVKYSQTEVLR                            | 3 | 484.27 |
|    |                                      |                                 |          |            |                                                                     |            |    |    |      |        |             |            |           | KTPVPAGCYDSK                           | 2 | 661.82 |
|    |                                      |                                 |          |            |                                                                     |            |    |    |      |        |             |            |           | IANMMADSGK                             | 2 | 519.24 |
|    |                                      |                                 |          | ADI47634.1 | metalloproteinase [Echis coloratus]                                 | P-III svMP | 3  | 21 | 69   | 185.85 | 180144670.9 | 0.00826396 | 0.0002413 | NGQPCLNLLGCGYNDGCPIMTNQCISLFGSR        | 3 | 1209.2 |
|    |                                      |                                 |          | CAJ01683.1 | group III snake venom metalloproteinase [Echis ocellatus]           | P-III svMP | 4  | 20 | 47.5 | 119.26 | 1901863598  | 0.08724615 | 0.002548  | KCDVNTAY                               | 2 | 535.25 |
|    |                                      |                                 |          |            |                                                                     |            |    |    |      |        |             |            |           | TDIVSPPVCGNDLLEKGEEDCGSPENCQNPCCDAASCK | 3 | 1481.6 |
|    |                                      |                                 |          | ADI47581.1 | metalloproteinase [Echis carinatus sochureki]                       | P-III svMP | 3  | 18 | 68.7 | 163.82 | 374165172.2 | 0.01716447 | 0.0005013 | CILDPPLR                               | 2 | 492.27 |
|    |                                      |                                 |          |            |                                                                     |            |    |    |      |        |             |            |           | CEDGKVCINR                             | 2 | 625.78 |
|    |                                      |                                 |          |            |                                                                     |            |    |    |      |        |             |            |           | ATVAEDSCFQENLK                         | 2 | 806.37 |
|    |                                      |                                 |          |            |                                                                     |            |    |    |      |        |             |            |           | VSDLLNR                                | 2 | 408.73 |
|    |                                      |                                 |          |            |                                                                     |            |    |    |      |        |             |            |           | LYCLDNSSR                              | 2 | 564.26 |
|    |                                      |                                 |          |            |                                                                     |            |    |    |      |        |             |            |           | KASDECVDPEYCTGQADCPR                   | 2 | 1223   |
|    |                                      |                                 |          | ADI47586.1 | metalloproteinase [Echis carinatus sochureki]                       | P-III svMP | 12 | 32 | 64   | 60.34  | 395128303.2 | 0.01812613 | 0.0005294 | FCTCGAK                                | 2 | 422.18 |
|    |                                      |                                 |          |            |                                                                     |            |    |    |      |        |             |            |           | LYCFDNLPEHK                            | 3 | 479.23 |
|    |                                      |                                 |          |            |                                                                     |            |    |    |      |        |             |            |           | NGHPCQNNNGYCYNGK                       | 3 | 632.92 |
|    |                                      |                                 |          |            |                                                                     |            |    |    |      |        |             |            |           | SCIMSGTLCSEGSFR                        | 2 | 846.37 |
|    |                                      |                                 |          |            |                                                                     |            |    |    |      |        |             |            |           | SIOEASQLNLTPEQQR                       | 2 | 921.47 |
|    |                                      |                                 |          |            |                                                                     |            |    |    |      |        |             |            |           | WRLSDLLNRR                             | 2 | 665.37 |
|    |                                      |                                 |          |            |                                                                     |            |    |    |      |        |             |            |           | CPVMGNQCISLFGSR                        | 2 | 863.4  |
|    |                                      |                                 |          |            |                                                                     |            |    |    |      |        |             |            |           | IYEIINLNAIYR                           | 2 | 804.46 |
|    |                                      |                                 |          |            |                                                                     |            |    |    |      |        |             |            |           | KMPQCILK                               | 2 | 509.28 |
|    |                                      |                                 |          | ADW54356.1 | group III snake venom metalloproteinase [Echis carinatus sochureki] | P-III svMP | 4  | 26 | 68.6 | 121.94 | 105159040.4 | 0.00482407 | 0.0001409 | ADEEDKGMVDEGTK                         | 2 | 770.33 |
|    |                                      |                                 |          |            |                                                                     |            |    |    |      |        |             |            |           | LYCSYNSFGNHISCLPCYR                    | 2 | 1206   |

|            |                                                                    |            |   |    |      |        |             |            |           |                                                                                                                                                                     |                                                     |                                                                                                           |
|------------|--------------------------------------------------------------------|------------|---|----|------|--------|-------------|------------|-----------|---------------------------------------------------------------------------------------------------------------------------------------------------------------------|-----------------------------------------------------|-----------------------------------------------------------------------------------------------------------|
| ADI47604.1 | metalloproteinase, partial [Echis carinatus sochureki]             | P-III svMP | 4 | 37 | 27.8 | 111.25 | 994663582   | 0.04562923 | 0.0013326 | GDFYCR<br>LFCDIGPNNR<br>TDIVSPPVCGNDLLER<br>LKPAGTECR<br>TPCAPEDVVK<br>NECDLPEYCTGQSGDCPTDHFHR<br>LHSWIECEFGCECQCR<br>KENDAKIPCAPEDVVK                              | 2<br>2<br>3<br>2<br>2<br>3<br>3<br>2                | 409.17<br>546.27<br>595.63<br>516.27<br>508.74<br>932.38<br>787.31<br>857.92                              |
| ADI47594.1 | metalloproteinase, partial [Echis carinatus sochureki]             | P-III svMP | 2 | 28 | 35.9 | 78.41  | 23437448.25 | 0.00107517 | 3.14E-05  |                                                                                                                                                                     |                                                     |                                                                                                           |
| ADI47654.1 | metalloproteinase, partial [Echis coloratus]                       | P-III svMP | 2 | 24 | 55.1 | 106.8  | 1024167458  | 0.04698269 | 0.0013721 | CPITLYQCR<br>QRDLLNR<br>REIVSPPVCGNELLEVGEEDCGSPANCRDPCCDAASCK                                                                                                      | 2<br>2<br>3                                         | 605.79<br>458.25<br>1490.9                                                                                |
| ADI47596.1 | metalloproteinase, partial [Echis carinatus sochureki]             | P-III svMP | 3 | 40 | 30.8 | 113.85 | 9143808.5   | 0.00041946 | 1.225E-05 | VCINGKCIDVNTAY<br>TDIISPPVCGNELLEK<br>GEECDGSPENCQYPCDDAASCK<br>LFCQTEPNMCR                                                                                         | 3<br>3<br>2<br>2                                    | 542.93<br>892.96<br>918.65<br>728.31                                                                      |
| ADW54339.1 | group III snake venom metalloproteinase [Echis ocellatus]          | P-III svMP | 2 | 9  | 72.8 | 126.8  | 686218770.2 | 0.03147962 | 0.0009194 | GMVDEGTK<br>TLDSFGEWR<br>LGNTYAYCR<br>DIMLIKLNKPVK<br>VLNEDEETREP<br>VLNEDEETR<br>KVLNEDEETR                                                                        | 2<br>2<br>2<br>3<br>3<br>3                          | 418.69<br>555.76<br>559.26<br>471.3<br>486.91<br>552.76<br>411.54                                         |
| ADI47568.1 | serine protease, partial [Echis coloratus]                         | svSP       | 4 | 11 | 25.4 | 49.56  | 519874938.2 | 0.02384876 | 0.0006965 | KVLNEDEETREP<br>VFKERMNWADAEK<br>ERMWADAEK<br>DGHLSVFR<br>MNVADAEK<br>NCLPDWVSVYEGYCYK<br>NSKEVDFMISLAFPMK<br>EVDFMISLAFPMK<br>DCYWVWSDGAOLDYK<br>MELVWIGLSDYYR     | 3<br>3<br>2<br>2<br>2<br>2<br>2<br>2<br>2<br>3      | 529.6<br>542.26<br>633.28<br>465.74<br>490.71<br>977.42<br>657.34<br>820.92<br>968.4<br>834.42            |
| AAB32774.1 | echicetin beta subunit[Echis carinatus]                            | Snaclecs   | 4 | 66 | 14.9 | 67.48  | 614768626.3 | 0.02820192 | 0.0008236 | TDIVSPPVCGNELLEK<br>YQIVNFLNEMYLWPNIR                                                                                                                               | 3<br>2                                              | 590.97<br>1171.6                                                                                          |
| ADI47585.1 | metalloproteinase [Echis carinatus sochureki]                      | P-III svMP | 3 | 20 | 69.2 | 70.39  | 942188710.2 | 0.043222   | 0.0012623 | HPYDDEGMVDPGK<br>IPCAPEDVVK<br>TDIISPPVCGNDLLEK<br>RFPAPQDVK<br>SCTCGANPCIMFSEVSEPTPK<br>GIFDGYCTK<br>CIFDPLLR<br>CSYDQYR<br>DDCDVPEHCTGQSAECP<br>KENDVPIPCAQEDVVK  | 2<br>2<br>3<br>2<br>2<br>2<br>2<br>2<br>2           | 751.83<br>514.76<br>590.97<br>406.5401<br>1186.506<br>530.7423<br>509.2634<br>496.2<br>711.6099<br>871.42 |
| ADW54346.1 | group III snake venom metalloproteinase, partial [Echis ocellatus] | P-III svMP | 2 | 16 | 63.2 | 45.49  | 79902573.59 | 0.00366545 | 0.000107  | YDYSEDDPDYGMVGQTK<br>TDIVSPPVCGNDILEQGEEDCGSPEKQDPCCDAASCK                                                                                                          | 2<br>3                                              | 962.9<br>1486.6                                                                                           |
| ADI47593.1 | metalloproteinase, partial [Echis carinatus sochureki]             | P-III svMP | 6 | 29 | 28.3 | 27.99  | 38980082.88 | 0.00178817 | 5.222E-05 | HCDVDNTAY<br>YCRNPCCDAATCK<br>EHDNAQLVTGIFNGQTLGRAPVSGMCSPR<br>CIDNKPLK<br>LFCVPEPSTGNK<br>TWDEAEK<br>SYEIAIR<br>TWDEAEKFCNK<br>EPKTWDEAEK<br>IWTGLSER<br>YSECFVLEK | 2<br>2<br>3<br>2<br>2<br>2<br>2<br>2<br>2<br>2<br>2 | 539.73<br>838.32<br>1077.2<br>494.27<br>626.31<br>439.7<br>426.23<br>476.55<br>616.79<br>481.26<br>587.78 |
| CAA55566.1 | metalloproteinase, partial [Echis pyramidum]                       | P-III svMP | 2 | 20 | 44.3 | 25.31  | 16532423.38 | 0.00075841 | 2.215E-05 | TDIVSPPVCGNYFVEVGEEDCGSPR                                                                                                                                           | 3                                                   | 981.7594                                                                                                  |
| ADW54348.1 | group III snake venom metalloproteinase [Echis ocellatus]          | P-III svMP | 4 | 12 | 69.4 | 44.03  | 58954101.41 | 0.00270446 | 7.898E-05 | SSADYVWIGLWLNK<br>SSADYVWIGLWNR<br>TWFNLR<br>NCFGLEK<br>LISENIK<br>GEECDGSPENCRNPCCDAASCK<br>LHSWIECESGECCQCR<br>RDLINWSSSIDTLR                                     | 2<br>2<br>2<br>2<br>3<br>3<br>3                     | 769.8868<br>847.9343<br>418.7243<br>434.2047<br>408.7434<br>911.9902<br>742.618<br>563.3161               |
| ADI47584.1 | metalloproteinase [Echis carinatus sochureki]                      | P-III svMP | 7 | 20 | 69.3 | 29.31  | 445221780.8 | 0.02042412 | 0.0005965 | WDKDIMLIK<br>NENEEMRVPAEK<br>IMGWGTITTTK<br>IFDYSVCR                                                                                                                | 2<br>3<br>2<br>2                                    | 581.32<br>488.22<br>604.82<br>530.25                                                                      |
| Q7T248.2   | Snaclec echicetin subunit alpha                                    | Snaclecs   | 6 | 36 | 15.7 | 73.19  | 2945185803  | 0.13510755 | 0.0039458 | YDYSEDDPDYGMVGQTK<br>TDIVSPPVCGNDILEQGEEDCGSPEKQDPCCDAASCK                                                                                                          | 2<br>2<br>3<br>2<br>2<br>2                          | 962.9<br>1486.6                                                                                           |
| ADI47653.1 | metalloproteinase [Echis coloratus]                                | P-III svMP | 2 | 9  | 69.2 | 36.07  | 13719466.44 | 0.00062937 | 1.838E-05 |                                                                                                                                                                     |                                                     |                                                                                                           |
| JAC96617.1 | C-type lectin J [Echis coloratus]                                  | Snaclecs   | 5 | 22 | 18.3 | 24.78  | 67195990.88 | 0.00308255 | 9.003E-05 |                                                                                                                                                                     |                                                     |                                                                                                           |
| ADI47638.1 | metalloproteinase [Echis coloratus]                                | P-III svMP | 3 | 13 | 61.8 | 16.29  | 10675952.38 | 0.00048975 | 1.43E-05  |                                                                                                                                                                     |                                                     |                                                                                                           |
| ADI47725.1 | metalloproteinase, partial [Echis carinatus sochureki]             | P-II svMP  | 2 | 9  | 27.7 | 43.98  | 18782995.22 | 0.00086165 | 2.516E-05 |                                                                                                                                                                     |                                                     |                                                                                                           |
| ADI47565.1 | serine protease, partial [Echis carinatus sochureki]               | svSP       | 4 | 17 | 26.2 | 22.5   | 123269201.9 | 0.00565486 | 0.0001652 | YENIEKEDEAPK<br>SYDNFR<br>LOGETVYFIESLK<br>YDYSENPNYGMVDEGTK                                                                                                        | 2<br>2<br>2<br>2                                    | 488.8999<br>483.2051<br>714.8883<br>991.9029                                                              |
| ANT80539.1 | venom metalloprotease PIII-SVMP EOC00089 [Echis ocellatus]         | P-III svMP | 2 | 7  | 68.4 | 5.98   | 1014180.656 | 4.6525E-05 | 1.359E-06 |                                                                                                                                                                     |                                                     |                                                                                                           |
| ADI47645.1 | metalloproteinase [Echis coloratus]                                | P-III svMP | 2 | 11 | 69.6 | 11.03  | 2674642.813 | 0.0001227  | 3.583E-06 |                                                                                                                                                                     |                                                     |                                                                                                           |
| ADI47566.1 | serine protease, partial [Echis coloratus]                         | svSP       | 2 | 8  | 28.8 | 6.88   | 40697285.38 | 0.00186695 | 5.452E-05 | TFCAGVLGGK<br>AAYPWLPVNSR<br>QYVIEFDR<br>YDSSESSTYKPK                                                                                                               | 2<br>2<br>2<br>2                                    | 569.29<br>637.34<br>567.2674<br>696.3211                                                                  |
| CAJ55260.1 | renin-like aspartic protease [Echis ocellatus]                     | AsP        | 2 | 5  | 43.8 | 11     | 18057113.84 | 0.00082835 | 2.419E-05 |                                                                                                                                                                     |                                                     |                                                                                                           |

|    |                                   |                                  |          |            |                                                                  |            |    |    |      |        |             |            |           |                                                                                                                                                                                                                                                          |  |   |          |
|----|-----------------------------------|----------------------------------|----------|------------|------------------------------------------------------------------|------------|----|----|------|--------|-------------|------------|-----------|----------------------------------------------------------------------------------------------------------------------------------------------------------------------------------------------------------------------------------------------------------|--|---|----------|
|    |                                   |                                  |          | pdbj1V7PjB | B Chain B, Ems16 B Chain                                         | Snaclecs   | 3  | 23 | 15.1 | 10.69  | 6538968.406 | 0.00029997 | 8.761E-06 | WEWSDNAR<br>LASHSSEEEAFVSK<br>IFWFR                                                                                                                                                                                                                      |  | 2 | 532.2333 |
|    |                                   |                                  |          | ADI47574.1 | serine protease, partial [Echis coloratus]                       | svSP       | 3  | 11 | 28.4 | 7.79   | 4770190     | 0.00021883 | 6.391E-06 | NMPNEDEQIR<br>TLCAGILQGGK                                                                                                                                                                                                                                |  | 2 | 435.2365 |
|    |                                   |                                  |          | P81017.1   | Snaclec echicetin subunit alpha                                  | Snaclecs   | 3  | 17 | 15.8 | 9.41   | 2526070.875 | 0.00011588 | 3.384E-06 | LKPAVYTK<br>TWDEAEK<br>VWVGLRDR<br>CFVLER                                                                                                                                                                                                                |  | 2 | 623.28   |
|    |                                   |                                  |          | Q9PSM9.1   | Snaclec coagulation factor IX/factor X-binding protein subunit A | Snaclecs   | 2  | 10 | 15.4 | 9.49   | 1060061479  | 0.0486293  | 0.0014202 | LKTWDEAEK<br>VFNEYK<br>TWKDAEK<br>VFNEYKWK<br>GKLELENLYLR                                                                                                                                                                                                |  | 2 | 559.3    |
|    |                                   |                                  |          | ABI33937.1 | hyaluronidase [Echis ocellatus]                                  | HYAL       | 2  | 5  | 52.5 | 5.37   | 1881220.188 | 8.6299E-05 | 2.52E-06  | NDQLLWLWR<br>WDKDIMLIK<br>AAFGRLPAGSR                                                                                                                                                                                                                    |  | 2 | 460.28   |
|    |                                   |                                  |          | ADI47556.1 | serine protease, partial [Echis ocellatus]                       | svSP       | 2  | 17 | 21.8 | 15.04  | 79570696.88 | 0.00365023 | 0.0001066 | IMGWGATSPNK<br>DIMLIKLRPVK<br>EAYGGLPEK                                                                                                                                                                                                                  |  | 2 | 439.22   |
|    |                                   |                                  |          | ADI47570.1 | serine protease, partial [Echis coloratus]                       | svSP       | 2  | 9  | 26.4 | 3.88   | 18136015.28 | 0.00083197 | 2.43E-05  | EAGNVAQLVSGFMHR<br>IYVNWK                                                                                                                                                                                                                                |  | 2 | 607.81   |
|    |                                   |                                  |          | BAC77706.1 | EMS16 A chain [Echis multisquamatus]                             | Snaclecs   | 2  | 15 | 18.2 | 6.1    | 3331812.031 | 0.00015284 | 4.464E-06 | ALTMEGNQASWR                                                                                                                                                                                                                                             |  | 3 | 487.6202 |
|    |                                   |                                  |          | JAC88974.1 | nerve growth factor a [Echis coloratus]                          | NGF        | 2  | 8  | 27.2 | 3      | 294785.625  | 1.3523E-05 | 3.949E-07 | YFCLPR                                                                                                                                                                                                                                                   |  | 2 | 622.3326 |
|    |                                   |                                  |          | ADI47576.1 | serine protease, partial [Echis coloratus]                       | svSP       | 2  | 5  | 28.2 | 7.25   | 398142292.6 | 0.01826439 | 0.0005334 | TLCAGILR                                                                                                                                                                                                                                                 |  | 2 | 581.3209 |
| 29 | 120.65,56.3<br>0.27,25, and<br>23 | 65,<br>56,30,25,16,<br>14 and 12 | 0.083108 | JAC96580.1 | L-amino acid oxidase B variant 1 [Echis coloratus]               | LAO        | 6  | 28 | 56.7 | 210.09 | 2608775853  | 0.14146257 | 0.0117567 | STTDLPSR                                                                                                                                                                                                                                                 |  | 2 | 587.8152 |
|    |                                   |                                  |          | CAQ72894.1 | L-amino oxidase [Echis ocellatus]                                | LAO        | 4  | 17 | 56.5 | 152.96 | 582674390.8 | 0.0315959  | 0.0026259 | IFLTCTK<br>HDDIFAYEK<br>YDTYSTK<br>DIVVVGAGMSGLSAAVYLAGAGHK<br>YDTYSTKEYLIK<br>HDDIFAYEKR<br>TSNPKDIVVVGAGMSGLSAAVYLAGAGHK<br>VTVLEASER<br>FDEIVGGMDRLPTSMYRAIEK<br>EANLSPGAVDMIGDLLNEDSGYYVFSIESLK<br>EADYEEFLEIAR<br>DIVVVGAGMSGLSAAVYLAGAGHKVTVLEASER |  | 2 | 645.8295 |
|    |                                   |                                  |          | ADI47586.1 | metalloproteinase [Echis carinatus sochureki]                    | P-III svMP | 12 | 28 | 69.1 | 232.18 | 4117804053  | 0.22329061 | 0.0185572 | STTDLPSR<br>AVEELKR<br>FWEDDGIQGGK<br>FWEDDGIQGGKSTTDLPSR<br>KFWEDDGIQGGK                                                                                                                                                                                |  | 2 | 482.2424 |
|    |                                   |                                  |          | ADI47725.1 | metalloproteinase, partial [Echis carinatus sochureki]           | P-II svMP  | 2  | 13 | 27.7 | 487.4  | 8738538337  | 0.47385293 | 0.039381  | LYCFDNLPEHK<br>SIQEA SOLNLTPQQR<br>AFPMHVALVFLIWSNGDK<br>YLSKHK<br>VAJADYLYR<br>IYEINILNAYR<br>LSDLLNRR<br>INVLPAAVTLDLFGK<br>KMPQCILK                                                                                                                   |  | 2 | 924.16   |
|    |                                   |                                  |          | JAC96587.1 | Phospholipase B [Echis coloratus]                                | PLB        | 10 | 19 | 64.5 | 36.74  | 8771763.945 | 0.00047565 | 3.953E-05 | ERDLLNR<br>SYKFSDCSK<br>RDLINVVSSIDTLR                                                                                                                                                                                                                   |  | 3 | 502.27   |
|    |                                   |                                  |          | ADI47580.1 | metalloproteinase [Echis carinatus sochureki]                    | P-III svMP | 2  | 8  | 68.2 | 45.57  | 3932473.5   | 0.00021324 | 1.772E-05 | QVVPESLFAWER<br>YSDQTEVLR<br>YNNYKEDPYTK<br>VTDMESMK<br>ENSGTYNNQYMILDTKK<br>ENSGTYNNQYMILDTK<br>IANMMADSGK<br>HQSLPESYNFDFVTMCPVL<br>HGYYWPSYNIPEHK<br>HPYGDGEMVPEGTK<br>YNDLHMR<br>VINVDHSMCTK<br>TDIVSPQVCGNGLLEK<br>SYDRYR                           |  | 2 | 422.75   |
|    |                                   |                                  |          | ADI47577.1 | metalloproteinase [Echis carinatus sochureki]                    | P-III svMP | 2  | 6  | 68.1 | 40.37  | 669170619.4 | 0.03628621 | 0.0030157 | ERDLLNR<br>SYKFSDCSK<br>RDLINVVSSIDTLR                                                                                                                                                                                                                   |  | 2 | 626.28   |
|    |                                   |                                  |          | ADW54339.1 | group III snake venom metalloproteinase [Echis ocellatus]        | P-III svMP | 3  | 5  | 72.8 | 32.93  | 416763604.3 | 0.02259928 | 0.0018782 | QVVPESLFAWER<br>YSDQTEVLR<br>YNNYKEDPYTK<br>VTDMESMK<br>ENSGTYNNQYMILDTKK<br>ENSGTYNNQYMILDTK<br>IANMMADSGK<br>HQSLPESYNFDFVTMCPVL<br>HGYYWPSYNIPEHK<br>HPYGDGEMVPEGTK<br>YNDLHMR<br>VINVDHSMCTK<br>TDIVSPQVCGNGLLEK<br>SYDRYR                           |  | 2 | 703.67   |
|    |                                   |                                  |          | ADI47643.1 | metalloproteinase [Echis coloratus]                              | P-III svMP | 2  | 7  | 69.3 | 42.59  | 83181363.55 | 0.00451056 | 0.0003749 | TLDSFGEWR<br>ANEEDKGMVDEGTK<br>LGNTYAYCR<br>KIPCAPQDVK<br>SVGLVQDHSTTLNR<br>LYCLDNTPGNK                                                                                                                                                                  |  | 2 | 690.33   |
|    |                                   |                                  |          | ADI47581.1 | metalloproteinase [Echis carinatus sochureki]                    | P-III svMP | 2  | 6  | 70.3 | 31.69  | 101573453.5 | 0.00550789 | 0.0004577 | GMVEPGTK<br>VSDLLNR<br>ATVAEDSCFQENLK<br>NPNYGMVDEGTK<br>ESVGIVQDHSK<br>YSDVALDYGMDVDPGTK<br>KYTGDVTAIK                                                                                                                                                  |  | 2 | 517.28   |
|    |                                   |                                  |          | ADI47638.1 | metalloproteinase [Echis coloratus]                              | P-III svMP | 2  | 5  | 70   | 25.44  | 1016774434  | 0.05513526 | 0.0045822 | GMVEPGTK<br>VSDLLNR<br>ATVAEDSCFQENLK<br>NPNYGMVDEGTK<br>ESVGIVQDHSK<br>YSDVALDYGMDVDPGTK<br>KYTGDVTAIK                                                                                                                                                  |  | 2 | 458.25   |
|    |                                   |                                  |          | ADI47641.1 | metalloproteinase [Echis coloratus]                              | P-III svMP | 2  | 5  | 69.2 | 12.74  | 4203985     | 0.00022796 | 1.895E-05 | GMVEPGTK<br>VSDLLNR<br>ATVAEDSCFQENLK<br>NPNYGMVDEGTK<br>ESVGIVQDHSK<br>YSDVALDYGMDVDPGTK<br>KYTGDVTAIK                                                                                                                                                  |  | 2 | 468.57   |
|    |                                   |                                  |          | ADI47588.1 | metalloproteinase, partial [Echis carinatus sochureki]           | P-III svMP | 2  | 4  | 57.6 | 7.43   | 11921618    | 0.00064646 | 5.373E-05 | GMVEPGTK<br>VSDLLNR<br>ATVAEDSCFQENLK<br>NPNYGMVDEGTK<br>ESVGIVQDHSK<br>YSDVALDYGMDVDPGTK<br>KYTGDVTAIK                                                                                                                                                  |  | 2 | 866.43   |

|    |                            |                       |         |            |                                                            |            |    |    |      |        |             |            |           |                                       |   |          |
|----|----------------------------|-----------------------|---------|------------|------------------------------------------------------------|------------|----|----|------|--------|-------------|------------|-----------|---------------------------------------|---|----------|
|    |                            |                       |         | ANT80539.1 | venom metalloprotease PIII-SVMP EOC00089 [Echis ocellatus] | P-III svMP | 2  | 5  | 68.4 | 4.73   | 2305676.688 | 0.00012503 | 1.039E-05 | ENDVEIPCAPEDVK                        | 2 | 807.8729 |
|    |                            |                       |         | ADI47585.1 | metalloproteinase [Echis carinatus sochureki]              | P-III svMP | 2  | 4  | 69.2 | 13.61  | 26164245.25 | 0.00141877 | 0.0001179 | TDIVSPVCGNELLEK                       | 3 | 591.3    |
|    |                            |                       |         | ADI47604.1 | metalloproteinase, partial [Echis carinatus sochureki]     | P-III svMP | 2  | 10 | 27.8 | 6.1    | 2788758.125 | 0.00015122 | 1.257E-05 | TDIVSPVCGNDLLER                       | 2 | 892.9461 |
|    |                            |                       |         | ADI47552.1 | serine protease, partial [Echis coloratus]                 | svSP       | 2  | 7  | 28.3 | 5.28   | 32309530    | 0.00175201 | 0.0001456 | LFCDIGNR<br>WDKDMLIK<br>ETVCLPSR      | 2 | 545.2687 |
|    |                            |                       |         | ADI47626.1 | metalloproteinase [Echis coloratus]                        | P-III svMP | 2  | 2  | 68.8 | 2.83   | 3789218.156 | 0.00020547 | 1.708E-05 | KENDVPIPCAQEDIK                       | 2 | 581.3203 |
|    |                            |                       |         | Q7T248.2   | Snaclec echicetin subunit alpha                            | Snaclecs   | 2  | 11 | 15.7 | 7.21   | 8538018.25  | 0.00046298 | 3.848E-05 | SYEIAIR<br>IWTGLSER                   | 2 | 586.773  |
|    |                            |                       |         | AAP41219.2 | echicetin B-chain [Echis carinatus]                        | Snaclecs   | 2  | 11 | 17.2 | 6.06   | 1475271.688 | 7.9998E-05 | 6.648E-06 | MNWADA EK<br>DGLHVSFR                 | 2 | 878.916  |
| 30 | 56.43,30,27,<br>25, and 23 | 56.43,16,14<br>and 12 | 0.00906 | JAC96580.1 | L-amino acid oxidase B variant 1 [Echis coloratus]         | LA AO      | 8  | 35 | 56.7 | 262.22 | 3084973872  | 0.25350229 | 0.0022967 | IFLTCTK                               | 2 | 426.2346 |
|    |                            |                       |         |            |                                                            |            |    |    |      |        |             |            |           |                                       | 2 | 481.2583 |
|    |                            |                       |         |            |                                                            |            |    |    |      |        |             |            |           |                                       | 2 | 482.7117 |
|    |                            |                       |         |            |                                                            |            |    |    |      |        |             |            |           |                                       | 2 | 465.7427 |
|    |                            |                       |         |            |                                                            |            |    |    |      |        |             |            |           |                                       | 2 | 441.74   |
|    |                            |                       |         |            |                                                            |            |    |    |      |        |             |            |           |                                       | 2 | 1130.1   |
|    |                            |                       |         |            |                                                            |            |    |    |      |        |             |            |           |                                       | 2 | 438.72   |
|    |                            |                       |         |            |                                                            |            |    |    |      |        |             |            |           |                                       | 2 | 569.26   |
|    |                            |                       |         |            |                                                            |            |    |    |      |        |             |            |           |                                       | 2 | 647.31   |
|    |                            |                       |         |            |                                                            |            |    |    |      |        |             |            |           |                                       | 2 | 505.79   |
|    |                            |                       |         |            |                                                            |            |    |    |      |        |             |            |           |                                       | 2 | 576.35   |
|    |                            |                       |         |            |                                                            |            |    |    |      |        |             |            |           |                                       | 2 | 439.2    |
|    |                            |                       |         |            |                                                            |            |    |    |      |        |             |            |           |                                       | 3 | 508.59   |
|    |                            |                       |         |            |                                                            |            |    |    |      |        |             |            |           |                                       | 3 | 753.04   |
|    |                            |                       |         |            |                                                            |            |    |    |      |        |             |            |           |                                       | 3 | 419.23   |
|    |                            |                       |         |            |                                                            |            |    |    |      |        |             |            |           |                                       | 2 | 502.27   |
|    |                            |                       |         |            |                                                            |            |    |    |      |        |             |            |           |                                       | 3 | 1121.5   |
|    |                            |                       |         |            |                                                            |            |    |    |      |        |             |            |           |                                       | 2 | 742.85   |
|    |                            |                       |         |            |                                                            |            |    |    |      |        |             |            |           |                                       | 3 | 810.73   |
|    |                            |                       |         | ADI47588.1 | metalloproteinase, partial [Echis carinatus sochureki]     | P-III svMP | 12 | 39 | 57.6 | 222.58 | 4329631038  | 0.3557798  | 0.0032234 | FDIYVGMRLPTSMYRAIEK<br>GGGYFYCR       | 2 | 625.73   |
|    |                            |                       |         |            |                                                            |            |    |    |      |        |             |            |           |                                       | 2 | 508.27   |
|    |                            |                       |         |            |                                                            |            |    |    |      |        |             |            |           |                                       | 2 | 613.73   |
|    |                            |                       |         |            |                                                            |            |    |    |      |        |             |            |           |                                       | 2 | 747.77   |
|    |                            |                       |         |            |                                                            |            |    |    |      |        |             |            |           |                                       | 2 | 684.79   |
|    |                            |                       |         |            |                                                            |            |    |    |      |        |             |            |           |                                       | 2 | 670.31   |
|    |                            |                       |         |            |                                                            |            |    |    |      |        |             |            |           |                                       | 3 | 846.09   |
|    |                            |                       |         |            |                                                            |            |    |    |      |        |             |            |           |                                       | 3 | 1096.2   |
|    |                            |                       |         |            |                                                            |            |    |    |      |        |             |            |           |                                       | 2 | 675.84   |
|    |                            |                       |         |            |                                                            |            |    |    |      |        |             |            |           |                                       | 2 | 534.71   |
|    |                            |                       |         |            |                                                            |            |    |    |      |        |             |            |           |                                       | 2 | 738.87   |
|    |                            |                       |         |            |                                                            |            |    |    |      |        |             |            |           |                                       | 2 | 881.9    |
|    |                            |                       |         |            |                                                            |            |    |    |      |        |             |            |           |                                       | 2 | 548.31   |
|    |                            |                       |         | CAQ72894.1 | L-amino oxidase [Echis ocellatus]                          | LA AO      | 4  | 19 | 56.5 | 231.51 | 679245361.1 | 0.05581579 | 0.0005057 | IFLTCTK<br>AVEELKR                    | 2 | 441.74   |
|    |                            |                       |         |            |                                                            |            |    |    |      |        |             |            |           |                                       | 2 | 422.75   |
|    |                            |                       |         |            |                                                            |            |    |    |      |        |             |            |           |                                       | 2 | 690.33   |
|    |                            |                       |         |            |                                                            |            |    |    |      |        |             |            |           |                                       | 3 | 703.67   |
|    |                            |                       |         |            |                                                            |            |    |    |      |        |             |            |           |                                       | 2 | 626.78   |
|    |                            |                       |         | ADI47586.1 | metalloproteinase [Echis carinatus sochureki]              | P-III svMP | 12 | 25 | 69.1 | 91.11  | 884788167.2 | 0.07270591 | 0.0006587 | FWEDDGIQGGKSTDLPSR<br>FVEDDGIQGGK     | 3 | 626.78   |
|    |                            |                       |         |            |                                                            |            |    |    |      |        |             |            |           |                                       | 2 | 422.18   |
|    |                            |                       |         |            |                                                            |            |    |    |      |        |             |            |           |                                       | 2 | 718.34   |
|    |                            |                       |         |            |                                                            |            |    |    |      |        |             |            |           |                                       | 2 | 842.99   |
|    |                            |                       |         |            |                                                            |            |    |    |      |        |             |            |           |                                       | 2 | 517.28   |
|    |                            |                       |         |            |                                                            |            |    |    |      |        |             |            |           |                                       | 2 | 804.95   |
|    |                            |                       |         |            |                                                            |            |    |    |      |        |             |            |           |                                       | 2 | 854.36   |
|    |                            |                       |         |            |                                                            |            |    |    |      |        |             |            |           |                                       | 2 | 921.47   |
|    |                            |                       |         |            |                                                            |            |    |    |      |        |             |            |           |                                       | 2 | 665.86   |
|    |                            |                       |         |            |                                                            |            |    |    |      |        |             |            |           |                                       | 2 | 655.38   |
|    |                            |                       |         |            |                                                            |            |    |    |      |        |             |            |           |                                       | 2 | 863.4    |
|    |                            |                       |         | ADI47580.1 | metalloproteinase [Echis carinatus sochureki]              | P-III svMP | 4  | 12 | 68.2 | 53.91  | 703735807.1 | 0.05782825 | 0.0005239 | HPYGDGEMVEPGTK<br>YNDLTAMR            | 2 | 758.84   |
|    |                            |                       |         |            |                                                            |            |    |    |      |        |             |            |           |                                       | 2 | 549.26   |
|    |                            |                       |         |            |                                                            |            |    |    |      |        |             |            |           |                                       | 3 | 898.36   |
|    |                            |                       |         |            |                                                            |            |    |    |      |        |             |            |           |                                       | 3 | 468.57   |
|    |                            |                       |         |            |                                                            |            |    |    |      |        |             |            |           |                                       | 3 | 576.61   |
|    |                            |                       |         | ADI47641.1 | metalloproteinase [Echis coloratus]                        | P-III svMP | 2  | 12 | 69.2 | 86.77  | 1164040259  | 0.09565296 | 0.0008666 | ESVGIQDHSK<br>YSDVALDYGMDVDPGTK       | 3 | 400.21   |
|    |                            |                       |         |            |                                                            |            |    |    |      |        |             |            |           |                                       | 2 | 873.9    |
|    |                            |                       |         | ADW54339.1 | group III snake venom metalloproteinase [Echis ocellatus]  | P-III svMP | 3  | 4  | 72.8 | 32.23  | 606007985.4 | 0.04979764 | 0.0004512 | AYMNANKFIKLVVDNVMYR<br>ANEEDKGMVDEGTK | 3 | 834.78   |
|    |                            |                       |         |            |                                                            |            |    |    |      |        |             |            |           |                                       | 2 | 770.33   |
|    |                            |                       |         |            |                                                            |            |    |    |      |        |             |            |           |                                       | 2 | 559.75   |
|    |                            |                       |         | ADI47643.1 | metalloproteinase [Echis coloratus]                        | P-III svMP | 3  | 8  | 69.3 | 33.04  | 67535678.25 | 0.00554963 | 5.028E-05 | KIPCAPQDVK<br>SVGLVDHSTTLNR           | 2 | 578.31   |
|    |                            |                       |         |            |                                                            |            |    |    |      |        |             |            |           |                                       | 3 | 509.6    |
|    |                            |                       |         |            |                                                            |            |    |    |      |        |             |            |           |                                       | 2 | 640.8    |
|    |                            |                       |         |            |                                                            |            |    |    |      |        |             |            |           |                                       | 2 | 518.24   |
|    |                            |                       |         | ADI47590.1 | metalloproteinase [Echis carinatus sochureki]              | P-III svMP | 2  | 6  | 69.5 | 25.6   | 213924607.4 | 0.01757888 | 0.0001593 | CMLDPPFR                              | 2 | 518.24   |
|    |                            |                       |         |            |                                                            |            |    |    |      |        |             |            |           |                                       | 2 | 423.72   |
|    |                            |                       |         |            |                                                            |            |    |    |      |        |             |            |           |                                       | 2 | 1032.5   |
|    |                            |                       |         | ADI47634.1 | metalloproteinase [Echis coloratus]                        | P-III svMP | 4  | 8  | 70.3 | 32.51  | 148278661.4 | 0.01218454 | 0.0001104 | VPLVGMFEWNR<br>LYCLDNSSR              | 3 | 497.92   |
|    |                            |                       |         |            |                                                            |            |    |    |      |        |             |            |           |                                       | 2 | 564.26   |
|    |                            |                       |         | ADI47725.1 | metalloproteinase, partial [Echis carinatus sochureki]     | P-II svMP  | 2  | 6  | 27.7 | 11.04  | 13769473.38 | 0.00113148 | 1.025E-05 | RDLINVSSSIDTLR                        | 3 | 563.3156 |
|    |                            |                       |         | CAA55566.1 | metalloprotease, partial [Echis pyramidum]                 | P-III svMP | 2  | 5  | 61.9 | 15.19  | 25093305    | 0.002062   | 1.868E-05 | KENDVPIPCAQEDVK                       | 3 | 581.29   |
|    |                            |                       |         | JAC96587.1 | Phospholipase B [Echis coloratus]                          | PLB        | 5  | 11 | 64.5 | 11.37  | 5081303.5   | 0.00041755 | 3.783E-06 | YNNYKEDPYTK                           | 2 | 717.83   |



Supplementary Table 2: Assignment of peptides sequenced from MS/MS spectra against protein database from *Echis* genus for ECVGO. Relative abundance of each protein from HPLC fractions were estimated by taking sum of precursor abundance of all peptides matched to respective proteins.

| Peak no. | Mol. Wt. by SDS-PAGE |                     | Peak fraction | Protein Information                                                        |                                                                                                                                                                                                                                                                                                                        |                                                                                              |                            |                               |                                              |                                                |                                                                                   |                                                                                  |                                                                            | Peptide Information                                                                                                                                                                            |                                                     |                                                                                                                                            |
|----------|----------------------|---------------------|---------------|----------------------------------------------------------------------------|------------------------------------------------------------------------------------------------------------------------------------------------------------------------------------------------------------------------------------------------------------------------------------------------------------------------|----------------------------------------------------------------------------------------------|----------------------------|-------------------------------|----------------------------------------------|------------------------------------------------|-----------------------------------------------------------------------------------|----------------------------------------------------------------------------------|----------------------------------------------------------------------------|------------------------------------------------------------------------------------------------------------------------------------------------------------------------------------------------|-----------------------------------------------------|--------------------------------------------------------------------------------------------------------------------------------------------|
|          | Reducing (-kDa)      | Non-reducing (-kDa) |               | Accession                                                                  | Description                                                                                                                                                                                                                                                                                                            | Toxin family                                                                                 | # Unique Peptides          | Coverage [%]                  | MW [kDa]                                     | Score Sequest HT                               | Sum of precursors Abundances                                                      | Relative abundance                                                               | Relative fraction of proteins                                              | Sequence                                                                                                                                                                                       | Charge                                              | m/z [Da]                                                                                                                                   |
| 1 and 2  | n.f                  | n.f                 |               | P17347.2<br>POC6R5.1                                                       | Disintegrin echistatin-alpha<br>Disintegrin multisquamatin                                                                                                                                                                                                                                                             | Disintegrins<br>Disintegrins                                                                 | 1<br>1                     | 100<br>100                    | 5.4<br>5.7                                   | 247.63<br>209.28                               | 2009869014<br>5923222980                                                          |                                                                                  |                                                                            | QCESGPPCR<br>EGEECESGPPCR<br>EGADCASGPPCR                                                                                                                                                      | 2<br>2<br>2                                         | 577.21<br>735.257<br>670.736                                                                                                               |
| 3        | 18                   | 14                  | 0.183442      | 1V7P<br>JAC96617.1<br>Q7T248.2                                             | B Chain B, Ems16 B Chain<br>C-type lectin J [Echis coloratus]<br>Snaclec echicetin subunit alpha; Flags: Precursor                                                                                                                                                                                                     | Snaclecs<br>Snaclecs<br>Snaclecs                                                             | 3<br>3<br>3                | 28<br>17<br>16                | 15.1<br>18.3<br>15.7                         | 9.3<br>6.89<br>9.36                            | 47628405.94<br>17570465.98<br>10387286.25                                         | 0.63012074<br>0.23245613<br>0.13742313                                           | 0.1155906<br>0.0426422<br>0.0252092                                        | LASHISSEEEAFVSK<br>SSADYVWVGLWLNK<br>IWTGLSER<br>TWDEAEK                                                                                                                                       | 3<br>2<br>2<br>2                                    | 545.274<br>769.884<br>481.259<br>439.698                                                                                                   |
| 4        | 18,16                | 18,16               | 0.030468      | 1OZ6<br>JAC88974.1                                                         | A Chain A, Phospholipase A2<br>nerve growth factor a [Echis coloratus]                                                                                                                                                                                                                                                 | PLA2<br>NGF                                                                                  | 2<br>2                     | 12<br>8                       | 13.7<br>27.2                                 | 10.6<br>15.48                                  | 103826309.3<br>21177287.56                                                        | 0.83058657<br>0.16941343                                                         | 0.0253063<br>0.0051617                                                     | MTLYSYR<br>NLYQFGR<br>ALTMEGNQASWR<br>QYFFETK                                                                                                                                                  | 2<br>2<br>2<br>2                                    | 467.228<br>449.232<br>682.325<br>481.735                                                                                                   |
| 5        | 14                   | 14                  | 0.059546      | 1OZ6                                                                       | A Chain A, Phospholipase A2                                                                                                                                                                                                                                                                                            | PLA2                                                                                         | 3                          | 25                            | 13.7                                         | 30.73                                          | 7306448051                                                                        | 1                                                                                | 0.059546                                                                   | MTLYSYR<br>EAAICLGENVNTYDK<br>EAAICLGENVNTYDKK<br>NLYQFGR                                                                                                                                      | 2<br>2<br>3<br>2                                    | 467.227<br>848.896<br>609.292<br>449.232                                                                                                   |
| 6        | 71,43                | 43                  | 0.029476      | 1OZ6<br>JAC88974.1<br>ADI47584.1<br>ADI47654.1                             | A Chain A, Phospholipase A2<br>nerve growth factor a [Echis coloratus]<br>metalloproteinase [Echis carinatus sochureki]<br>metalloproteinase, partial [Echis coloratus]                                                                                                                                                | PLA2<br>NGF<br>P-III svMP<br>P-III svMP                                                      | 5<br>2<br>4<br>2           | 48<br>8<br>11<br>4            | 13.7<br>27.2<br>69.3<br>55.1                 | 58.49<br>8.65<br>24.66<br>4.36                 | 12945719283<br>43128697.5<br>700813755.5<br>23240636.41                           | 0.94405392<br>0.00314512<br>0.05110616<br>0.0016948                              | 0.0278269<br>9.271E-05<br>0.0015064<br>4.996E-05                           | MTLYSYR<br>EAAICLGENVNTYDK<br>EAAICLGENVNTYDKK<br>NLYQFGR<br>ALTMEGNQASWR<br>EHDNAQLVTGINFNGQTLGR<br>SQDDPDYGMVDIGTK<br>QRDLLNR                                                                | 2<br>2<br>2<br>2<br>3<br>3<br>2                     | 467.228<br>848.896<br>912.942<br>449.233<br>682.817<br>728.694<br>547.575<br>458.254                                                       |
| 8        | 33                   | 33                  | 0.045146      | CAJ01689.1<br>ADW54338.1<br>ADI47565.1<br>ADI47671.1<br>ADI47596.1<br>1OZ6 | Group III snake venom metalloproteinase [Echis ocellatus]<br>group III snake venom metalloproteinase [Echis ocellatus]<br>serine protease, partial [Echis carinatus sochureki]<br>metalloproteinase [Echis pyramidum leakeyi]<br>metalloproteinase, partial [Echis carinatus sochureki]<br>A Chain A, Phospholipase A2 | DC domain (P-II)<br>DC domain (P-II)<br>svSP<br>DC domain (P-II)<br>DC domain (P-II)<br>PLA2 | 2<br>2<br>2<br>2<br>2<br>2 | 7<br>4<br>14<br>9<br>12<br>12 | 69.8<br>72.8<br>26.2<br>69.9<br>30.8<br>13.7 | 114.71<br>36.8<br>10.41<br>8.98<br>7.4<br>2.47 | 288343125.5<br>1523610613<br>17562372.45<br>39814319.13<br>447285566<br>9021284.5 | 0.12398456<br>0.65513682<br>0.00755164<br>0.01711975<br>0.19232817<br>0.00387906 | 0.0055974<br>0.0295768<br>0.0003409<br>0.0007729<br>0.0086828<br>0.0001751 | GMVEPGTK<br>IPCAPQDVK<br>LYCLDNSSR<br>MHYLNADQHK<br>ANEEDKGMVDEGTK<br>NENEEMRVPAEK<br>CILDPPLR<br>RFPCAPQDVK<br>TDIISPPVCGNELLEK<br>NLYQFGR                                                    | 2<br>2<br>2<br>3<br>2<br>3<br>2<br>2<br>2<br>2      | 409.708<br>514.265<br>564.262<br>419.861<br>770.331<br>488.221<br>492.271<br>406.866<br>893.453<br>449.232                                 |
| 9        | 30, 27               | 16, 14              | 0.047574      | ADI47575.1<br>ADI47568.1<br>ADI47577.1<br>ADI47581.1                       | serine protease, partial [Echis carinatus sochureki]<br>serine protease, partial [Echis coloratus]<br>metalloproteinase [Echis carinatus sochureki]<br>metalloproteinase [Echis carinatus sochureki]                                                                                                                   | svSP<br>svSP<br>P-III svMP<br>P-III svMP                                                     | 3<br>4<br>3<br>2           | 35<br>19<br>5<br>6            | 25.7<br>25.4<br>68.1<br>68.7                 | 284.95<br>26.51<br>7.98<br>1.89                | 2922529969<br>67331486.61<br>3167685.203<br>2009774.133                           | 0.97579032<br>0.02248101<br>0.00105764<br>0.00067103                             | 0.0464222<br>0.0010695<br>5.032E-05<br>3.192E-05                           | NMPNEDEQIR<br>FPNGMDK<br>NMPNEDEQIRVPK<br>HSWCEAIYPWVPADSR<br>TLCAGILQGGK<br>FPNGMDKDIMLIR<br>VLNEDETR<br>TLCAGILEGGK<br>KVLNEDETR<br>VLNEDETR<br>ASDLLSHK<br>GMVEPGTK<br>SLGMAFVDMCKPYRSVGLIK | 2<br>2<br>3<br>2<br>3<br>2<br>2<br>2<br>2<br>2<br>3 | 623.28<br>404.687<br>523.928<br>658.637<br>559.797<br>528.262<br>552.762<br>559.797<br>411.542<br>553.254<br>435.737<br>409.707<br>782.395 |
| 10       | 27                   | 16, 14              | 0.048999      | JAC88974.1<br>Q7T248.2                                                     | nerve growth factor a [Echis coloratus]<br>Snaclec echicetin subunit alpha; Flags: Precursor                                                                                                                                                                                                                           | NGF<br>Snaclecs                                                                              | 2<br>6                     | 8<br>36                       | 27.2<br>15.7                                 | 1.95<br>47.16                                  | 6252042.219<br>6471655778                                                         | 0.00096513<br>0.99903487                                                         | 4.729E-05<br>0.0489517                                                     | ALTMEGNQASWR<br>TWDEAEK<br>DGHLLSIESK<br>IWTGLSER<br>SYEIAIR<br>YSECFVLEK                                                                                                                      | 2<br>2<br>2<br>2<br>2<br>2                          | 682.82<br>439.7<br>549.793<br>481.26<br>426.235<br>587.776                                                                                 |
| 11       | 27                   | 16, 14              | 0.01107       | Q9PSM9.1                                                                   | Snaclec coagulation factor IX/factor X-binding protein subunit A                                                                                                                                                                                                                                                       | Snaclecs                                                                                     | 5                          | 30                            | 15.4                                         | 13.04                                          | 1205056578                                                                        | 0.94617892                                                                       | 0.0104742                                                                  | SGHLVSVESSEEGDFVAKLISEN<br>LEK<br>VFNEYK<br>VFNEYKTKW                                                                                                                                          | 3<br>2<br>2<br>3                                    | 935.458<br>400.204<br>405.545                                                                                                              |



|    |          |       |          |            |                                                         |            |    |    |      |        |             |            |           |                                                                                                                                     |                                      |                                                                           |
|----|----------|-------|----------|------------|---------------------------------------------------------|------------|----|----|------|--------|-------------|------------|-----------|-------------------------------------------------------------------------------------------------------------------------------------|--------------------------------------|---------------------------------------------------------------------------|
|    |          |       |          | Q7T248.2   | Snaclec echicetin subunit alpha                         | Snaclecs   | 4  | 30 | 15.7 | 9.67   | 68546704.63 | 0.05382108 | 0.0005958 | TWDEAEK                                                                                                                             | 2                                    | 439.698                                                                   |
| 12 | 54,50,27 | 14    | 0.030133 | ADI47581.1 | metalloproteinase [Echis carinatus sochureki]           | P-III svMP | 3  | 4  | 70.3 | 6.13   | 7714139.547 | 0.00178476 | 5.378E-05 | GMVEPGTK                                                                                                                            | 2                                    | 409.707                                                                   |
|    |          |       |          | ADI47590.1 | metalloproteinase [Echis carinatus sochureki]           | P-III svMP | 2  | 5  | 69.5 | 13.43  | 76287263.31 | 0.01764999 | 0.0005318 | VPLVGMFVWNR                                                                                                                         | 2                                    | 738.869                                                                   |
|    |          |       |          | JAC96622.1 | C-type lectin E, partial [Echis coloratus]              | Snaclecs   | 3  | 19 | 11.6 |        | 989489829.2 | 0.22893051 | 0.0068984 | MCQGLAK                                                                                                                             | 2                                    | 404.196                                                                   |
|    |          |       |          | 1V7P       | B Chain B, Ems16 B Chain                                | Snaclecs   | 7  | 52 | 15.1 | 45.76  | 1356194447  | 0.31377208 | 0.0094549 | IIVVNWKEGESK<br>IIVVNWK                                                                                                             | 3<br>2                               | 489.261<br>468.763                                                        |
|    |          |       |          | P81017.1   | Snaclec echicetin subunit alpha                         | Snaclecs   | 3  | 17 | 15.8 | 17.64  | 493665973.3 | 0.11421563 | 0.0034417 | WEWSDNAR<br>IFWFTR<br>LASIHSSEEEAFVSKLASK<br>LASIHSSEEEAFVSK<br>FTSMWIGLNNPWK                                                       | 2<br>2<br>3<br>3<br>2                | 532.725<br>435.237<br>678.357<br>545.274<br>805.394                       |
|    |          |       |          | JAC96580.1 | L-amino acid oxidase B variant 1 [Echis coloratus]      | LAAO       | 5  | 12 | 56.7 | 14.55  | 60655441.56 | 0.01403337 | 0.0004229 | TWDEAEK<br>LKTWDEAEK<br>YDTYSTK                                                                                                     | 2<br>2<br>2                          | 439.2<br>560.286<br>439.2                                                 |
|    |          |       |          | JAC96617.1 | C-type lectin J [Echis coloratus]                       | Snaclecs   | 4  | 18 | 18.3 | 24.97  | 254647502.6 | 0.0589158  | 0.0017753 | EADYEEFLEIAR<br>SSADYVWIGLWNKR<br>SSADYVWIGLWNK                                                                                     | 2<br>2<br>2                          | 742.849<br>847.94<br>769.887                                              |
|    |          |       |          | ADI47570.1 | serine protease, partial [Echis coloratus]              | svSP       | 2  | 5  | 26.4 | 6.56   | 779086548.3 | 0.18025115 | 0.0054315 | EAYGGLPEKSR                                                                                                                         | 3                                    | 402.875                                                                   |
|    |          |       |          | Q7T248.2   | Snaclec echicetin subunit alpha; Flags: Precursor       | Snaclecs   | 2  | 16 | 15.7 | 17.05  | 5413537.875 | 0.00125249 | 3.774E-05 | TWDEAEK                                                                                                                             | 2                                    | 439.698                                                                   |
|    |          |       |          | ADI47577.1 | metalloproteinase [Echis carinatus sochureki]           | P-III svMP | 2  | 3  | 68.1 | 13.71  | 299073192.3 | 0.06919422 | 0.002085  | ASDLLSHK<br>YNNDLTAMR                                                                                                               | 2<br>2                               | 435.737<br>549.257                                                        |
| 13 | 54, 27   | 14    | 0.009734 | JAC96580.1 | L-amino acid oxidase B variant 1 [Echis coloratus]      | LAAO       | 10 | 25 | 56.7 | 147.44 | 1630971499  | 0.3907317  | 0.0038034 | VTVLEASER<br>YDTYSTK<br>DIVVVGAGMSGLSAAYVLAGAG<br>HK<br>EADYEEFLEIAR<br>FDEIVGGMDRLPTSMYRAIEK<br>HDDIFAYEK<br>STTDLPSR              | 2<br>2<br>3<br>2<br>3<br>3<br>2<br>2 | 502.276<br>439.2<br>748.4<br>742.85<br>816.056<br>569.264<br>438.724      |
|    |          |       |          | ADI47577.1 | metalloproteinase [Echis carinatus sochureki]           | P-III svMP | 2  | 11 | 68.1 | 296.86 | 18470200    | 0.0044249  | 4.307E-05 | YNNDLTAMR<br>TRVYEMINTVNEIYIMHIR<br>VYEMINTVNEIYIMHIR<br>CIDVNTAY                                                                   | 2<br>3<br>3<br>3                     | 557.745<br>853.436<br>767.719<br>478.213                                  |
|    |          |       |          | ADI47596.1 | metalloproteinase, partial [Echis carinatus sochureki]  | P-III svMP | 2  | 39 | 30.8 | 71.78  | 357519906.2 | 0.08565101 | 0.0008337 | ASDLLSHK<br>NGQPCLHNYGYCYNGK<br>KENDVKIPCAPEDVK<br>ENDVKIPCAPEDVK<br>IPCAPEDVK<br>TDIISPPVCGNELLEK                                  | 2<br>3<br>3<br>2<br>2<br>2           | 435.738<br>649.598<br>581.625<br>807.396<br>514.76<br>893.449             |
|    |          |       |          | 1V7P       | B Chain B, Ems16 B Chain                                | Snaclecs   | 8  | 55 | 15.1 | 24.24  | 382915520   | 0.09173504 | 0.0008929 | FTSMWIGLNNPWK<br>LASIHSSEEEAFVSK<br>RPYCTVMVVKPDR                                                                                   | 2<br>2<br>3                          | 797.396<br>817.406<br>540.95                                              |
|    |          |       |          | ADW54346.1 | group III snake venom metalloproteinase, partial [Echis | P-III svMP | 2  | 14 | 63.2 | 39.06  | 10073974    | 0.00241342 | 2.349E-05 | KENDVKIPCAPEDVK<br>GKSDFYCR<br>GEECDGSPENCRYPCCDAASC<br>K<br>TDIISPPVCGNDLLEK                                                       | 3<br>2<br>3<br>2                     | 581.625<br>516.731<br>928.324<br>885.948                                  |
|    |          |       |          | JAC96617.1 | C-type lectin J [Echis coloratus]                       | Snaclecs   | 3  | 13 | 18.3 | 17.43  | 87880682.88 | 0.02105357 | 0.0002049 | SSADYVWIGLWNK                                                                                                                       | 2                                    | 769.885                                                                   |
|    |          |       |          | ADI47581.1 | metalloproteinase [Echis carinatus sochureki]           | P-III svMP | 3  | 6  | 69.8 | 24.81  | 1523806400  | 0.36505816 | 0.0035535 | IPCAPQDVK<br>GMVEPGTK<br>VSDLLNR                                                                                                    | 2<br>2<br>2                          | 514.76<br>409.707<br>408.732                                              |
|    |          |       |          | Q7T248.2   | Snaclec echicetin subunit alpha; Flags: Precursor       | Snaclecs   | 3  | 23 | 15.7 | 9.46   | 38702591.38 | 0.00927198 | 9.025E-05 | TWDEAEK                                                                                                                             | 2                                    | 439.698                                                                   |
|    |          |       |          | ADI47576.1 | serine protease, partial [Echis coloratus]              | svSP       | 2  | 12 | 28.2 | 1.97   | 21245575.02 | 0.0050898  | 4.954E-05 | VFDYTDWVQSIAGNTAVTCPP                                                                                                               | 2                                    | 1227.59                                                                   |
|    |          |       |          | ADI47648.1 | metalloproteinase [Echis coloratus]                     | P-III svMP | 2  | 9  | 68   | 7.49   | 67190735.25 | 0.01609688 | 0.0001567 | CIDVNTAY<br>ENDVLIPCAQQDVK                                                                                                          | 2<br>2                               | 478.213<br>815.884                                                        |
|    |          |       |          | P81017.1   | Snaclec echicetin subunit alpha                         | Snaclecs   | 2  | 11 | 15.8 | 9.87   | 35369810    | 0.00847354 | 8.248E-05 | TWDEAEK                                                                                                                             | 2                                    | 439.698                                                                   |
| 14 | 54,43    | 54,43 | 0.020879 | ADI47581.1 | metalloproteinase [Echis carinatus sochureki]           | P-III svMP | 2  | 5  | 68.7 | 17.02  | 109908899.3 | 0.00444569 | 9.282E-05 | GMVEPGTK                                                                                                                            | 2                                    | 409.708                                                                   |
|    |          |       |          | ADI47590.1 | metalloproteinase [Echis carinatus sochureki]           | P-III svMP | 2  | 6  | 69.5 | 52.1   | 4471230891  | 0.18085628 | 0.0037761 | VPLVGMFVWNR<br>KYNGNLR                                                                                                              | 3<br>2                               | 498.245<br>433.23                                                         |
|    |          |       |          | ADI47585.1 | metalloproteinase [Echis carinatus sochureki]           | P-III svMP | 2  | 5  | 69.2 | 16.62  | 55385731.63 | 0.00224029 | 4.678E-05 | KENDVKIPCAPEDIK                                                                                                                     | 3                                    | 585.969                                                                   |
|    |          |       |          | ADI47580.1 | metalloproteinase [Echis carinatus sochureki]           | P-III svMP | 3  | 12 | 68.2 | 325.15 | 7118754214  | 0.28794563 | 0.006012  | YNNDLTAMR<br>TRVYEMLNTVNEIYIMHIR<br>TRVYEMINTVNEIYIMHIR<br>VYEMINTVNEIYIMHIR<br>VYEMLNTVNEIYIMHIR<br>VIVVDHSMCTK<br>KENDVPVPCAQEDVK | 2<br>3<br>3<br>3<br>3<br>3<br>3      | 557.254<br>853.433<br>858.766<br>767.718<br>773.377<br>468.571<br>576.613 |



|    |            |            |          |            |                                                        |            |   |    |      |        |             |            |           |                                                                                                                                                                                                         |                                                          |                                                                           |
|----|------------|------------|----------|------------|--------------------------------------------------------|------------|---|----|------|--------|-------------|------------|-----------|---------------------------------------------------------------------------------------------------------------------------------------------------------------------------------------------------------|----------------------------------------------------------|---------------------------------------------------------------------------|
|    |            |            |          | CAQ72894.1 | L-amino oxidase [Echis ocellatus]                      | LAAO       | 2 | 12 | 56.5 | 40.08  | 36852624.06 | 0.02464853 | 0.0017494 | TDIVSPPVCGNALLEK<br>YDTYSTK<br>STTDLPSR                                                                                                                                                                 | 2<br>2<br>2                                              | 857.441<br>439.2<br>438.725                                               |
|    |            |            |          | JAC96580.1 | L-amino acid oxidase B variant 1 [Echis coloratus]     | LAAO       | 2 | 14 | 56.7 | 39.37  | 86320896.41 | 0.05773492 | 0.0040976 | KFWEDDGIQGGK<br>YDTYSTK<br>EADYEEFLEIAR<br>VTVEASER                                                                                                                                                     | 3<br>2<br>2<br>2                                         | 460.558<br>439.2<br>742.849<br>502.274                                    |
|    |            |            |          | ADI47584.1 | metalloproteinase [Echis carinatus sochureki]          | P-III svMP | 2 | 7  | 69.3 | 16.74  | 157280666.4 | 0.1051957  | 0.0074661 | SQDDPDYGMVDIGTK                                                                                                                                                                                         | 2                                                        | 828.856                                                                   |
| 19 | 91,71,54   | 65,54      | 0.050173 | CAJ01689.1 | Group III snake venom metalloproteinase [Echis ocellat | P-III svMP | 2 | 7  | 69.8 | 105.16 | 519242093.5 | 0.19895458 | 0.0099821 | CILDPLLR<br>GMVEPGTK<br>LYCLDNSSR<br>MHYLNADQHK                                                                                                                                                         | 2<br>2<br>2<br>3                                         | 492.271<br>409.707<br>564.26<br>419.535                                   |
|    |            |            |          | ADI47590.1 | metalloproteinase [Echis carinatus sochureki]          | P-III svMP | 2 | 5  | 69.5 | 21.04  | 1333218231  | 0.51084048 | 0.0256304 | VPLVGMFVFNQR<br>TDIVSPPVCGNALLEK                                                                                                                                                                        | 2<br>2                                                   | 746.867<br>857.44                                                         |
|    |            |            |          | CAQ72894.1 | L-amino oxidase [Echis ocellatus]                      | LAAO       | 2 | 13 | 56.5 | 40.42  | 35659579    | 0.01366345 | 0.0006855 | YDTYSTK<br>STTDLPSR<br>DIVVVGAGMSGLSAAYVLAGAG<br>HK                                                                                                                                                     | 2<br>2<br>3<br>3                                         | 439.2<br>438.724<br>748.399<br>460.557                                    |
|    |            |            |          | JAC96580.1 | L-amino acid oxidase B variant 1 [Echis coloratus]     | LAAO       | 3 | 18 | 56.7 | 44.01  | 282297347.5 | 0.10816602 | 0.005427  | KFWEDDGIQGGK<br>YDTYSTK<br>EADYEEFLEIAR<br>VTVEASER                                                                                                                                                     | 3<br>2<br>2<br>2                                         | 460.557<br>439.2<br>742.849<br>502.274                                    |
|    |            |            |          | ADI47584.1 | metalloproteinase [Echis carinatus sochureki]          | P-III svMP | 2 | 6  | 69.3 | 10.25  | 388551815.7 | 0.14887885 | 0.0074697 | SQDDPDYGMVDIGTK                                                                                                                                                                                         | 2                                                        | 820.859                                                                   |
|    |            |            |          | ADI47671.1 | metalloproteinase [Echis pyramidum leakeyi]            | P-III svMP | 2 | 9  | 69.9 | 8.97   | 50883296.5  | 0.01949662 | 0.0009782 | CILDPLLR<br>RFPDAPQDVK                                                                                                                                                                                  | 2<br>3                                                   | 492.271<br>406.866                                                        |
| 20 | 54         | 54         | 0.011069 | ADW54338.1 | group III snake venom metalloproteinase [Echis ocellat | P-III svMP | 2 | 4  | 72.8 | 12.56  | 9398102.688 | 0.00105953 | 1.173E-05 | ANEEDKGMVDEGTK                                                                                                                                                                                          | 3                                                        | 508.556                                                                   |
|    |            |            |          | ADI47581.1 | metalloproteinase [Echis carinatus sochureki]          | P-III svMP | 2 | 6  | 68.7 | 18.34  | 23529945.64 | 0.00265274 | 2.936E-05 | GMVEPGTK                                                                                                                                                                                                | 2                                                        | 409.708                                                                   |
|    |            |            |          | ADI47590.1 | metalloproteinase [Echis carinatus sochureki]          | P-III svMP | 2 | 5  | 69.5 | 4.64   | 5314957.531 | 0.0005992  | 6.633E-06 | VPLVGMFVFNQR                                                                                                                                                                                            | 2                                                        | 746.865                                                                   |
|    |            |            |          | CAQ72894.1 | L-amino oxidase [Echis ocellatus]                      | LAAO       | 5 | 19 | 56.5 | 409.63 | 1054126221  | 0.11884105 | 0.0013155 | YDTYSTKEYLIK<br>STTDLPSR<br>RINFKPLPPK<br>DIVVVGAGMSGLSAAYVLAGAG<br>HK                                                                                                                                  | 3<br>2<br>3<br>3<br>3                                    | 508.591<br>438.725<br>436.599<br>748.4<br>576.345                         |
|    |            |            |          | JAC96580.1 | L-amino acid oxidase B variant 1 [Echis coloratus]     | LAAO       | 6 | 35 | 56.7 | 409.87 | 7763745902  | 0.87527633 | 0.0096884 | INFKPLPPK<br>YDTYSTK<br>HDDIFAYEKR<br>HDDIFAYEK<br>AVEELKR<br>KFWEDDGIQGGK<br>FWEDDGIQGGK<br>YDTYSTKEYLIK<br>FDEIVGGMDRLPTSMYRAIEK<br>VTVEASER<br>EADYEEFLEIAR<br>EADYEEFLEIARNGLK<br>VYEMINTVNEIYIMHIR | 3<br>2<br>3<br>2<br>2<br>3<br>3<br>3<br>2<br>3<br>3<br>3 | 508.591<br>821.388<br>502.273<br>495.568<br>633.31<br>767.717             |
|    |            |            |          | ADI47577.1 | metalloproteinase [Echis carinatus sochureki]          | P-III svMP | 2 | 4  | 68.1 | 1.61   | 13936090.75 | 0.00157114 | 1.739E-05 |                                                                                                                                                                                                         | 3                                                        | 767.717                                                                   |
| 21 | 1,54,43,30 | 54,43      | 0.028888 | JAC96580.1 | L-amino acid oxidase B variant 1 [Echis coloratus]     | LAAO       | 5 | 32 | 56.7 | 83.23  | 1668649343  | 0.40009007 | 0.0115578 | YDTYSTK<br>STTDLPSR<br>DIVVVGAGMSGLSAAYVLAGAG<br>HK                                                                                                                                                     | 2<br>2<br>3                                              | 439.201<br>438.725<br>748.4                                               |
|    |            |            |          | CAQ72894.1 | L-amino oxidase [Echis ocellatus]                      | LAAO       | 2 | 15 | 56.5 | 80.64  | 170426309.4 | 0.04086291 | 0.0011804 | HDDIFAYEK<br>FDEIVGGMDRLPTSMYRAIEK<br>VTVEASER<br>EADYEEFLEIAR<br>YDTYSTK<br>KFWEDDGIQGGK<br>FWEDDGIQGGK                                                                                                | 3<br>3<br>3<br>3<br>2<br>2<br>2                          | 569.265<br>816.056<br>502.274<br>495.568<br>439.201<br>460.558<br>626.777 |
|    |            |            |          | ADW54338.1 | group III snake venom metalloproteinase [Echis ocellat | P-III svMP | 5 | 7  | 69.5 | 78.98  | 2079016345  | 0.49848328 | 0.0144002 | ANEEDKGMVDEGTK<br>GMVDEGTK                                                                                                                                                                              | 3<br>2                                                   | 508.559<br>418.694                                                        |
|    |            |            |          | ADI47590.1 | metalloproteinase [Echis carinatus sochureki]          | P-III svMP | 4 | 9  | 69.5 | 6.41   | 244880576.3 | 0.05871472 | 0.0016962 | VPLVGMFVFNQR                                                                                                                                                                                            | 2                                                        | 746.865                                                                   |
|    |            |            |          | P81017.1   | Snaclec echicetin subunit alpha                        | Snaclecs   | 2 | 7  | 15.8 | 3.87   | 7711652.5   | 0.00184901 | 5.341E-05 | TWDEAEK                                                                                                                                                                                                 | 2                                                        | 439.698                                                                   |
| 23 | 4,30,27,24 | 4,24,16,10 | 0.040581 | CAQ72894.1 | L-amino oxidase [Echis ocellatus]                      | LAAO       | 3 | 12 | 56.5 | 52.59  | 1531632012  | 0.31355117 | 0.0127242 | DIVVVGAGMSGLSAAYVLAGAG<br>HK<br>STTDLPSR<br>KFWEDDGIQGGK<br>KFWEDDGIQGGK<br>FWEDDGIQGGK                                                                                                                 | 3<br>2<br>2<br>3<br>3<br>2                               | 753.73<br>438.728<br>460.886<br>460.558<br>460.558<br>626.287             |

|    |             |            |          |            |                                                           |            |    |    |      |        |             |            |           |                                                                                                                                                                                                                           |                                                          |                                                                                                                                  |
|----|-------------|------------|----------|------------|-----------------------------------------------------------|------------|----|----|------|--------|-------------|------------|-----------|---------------------------------------------------------------------------------------------------------------------------------------------------------------------------------------------------------------------------|----------------------------------------------------------|----------------------------------------------------------------------------------------------------------------------------------|
|    |             |            |          | JAC96580.1 | L-amino acid oxidase B variant 1 [Echis coloratus]        | LAO        | 6  | 26 | 56.7 | 36.67  | 1430731434  | 0.2928951  | 0.011886  | DIVVVGAGMSGLSAAYVLAGAG<br>HK<br>FDEIVGGMDRLPTSMYRAIEK<br>EADYEEFLEIAR<br>IYFAGEYTANAHGWIDSTIK<br>VTVLEASER<br>SQDDPDYGMVDIGTK<br>ANEEDKGMVDEGTK<br>LASHSSSEEEAFVSK<br>GMVEPGTK<br>NPCQIYYTLRDENK                          | 3<br>3<br>3<br>2<br>2<br>3<br>3<br>3<br>2                | 753.73<br>816.055<br>495.567<br>753.035<br>502.275<br>828.856<br>513.888<br>545.274<br>409.708<br>605.62                         |
|    |             |            |          | ADI47584.1 | metalloproteinase [Echis carinatus sochurek]              | P-III svMP | 4  | 10 | 69.3 | 25.38  | 1403464174  | 0.28731303 | 0.0116594 | SQDDPDYGMVDIGTK                                                                                                                                                                                                           | 2                                                        | 828.856                                                                                                                          |
|    |             |            |          | ADW54338.1 | group III snake venom metalloproteinase [Echis ocellatus] | P-III svMP | 2  | 4  | 72.8 | 29.15  | 498420409.8 | 0.10203515 | 0.0041407 | ANEEDKGMVDEGTK                                                                                                                                                                                                            | 3                                                        | 513.888                                                                                                                          |
|    |             |            |          | 1V7P       | B Chain B, Ems16 B Chain                                  | Snaclecs   | 4  | 33 | 15.1 | 10.72  | 17301428    | 0.0035419  | 0.0001437 | LASHSSSEEEAFVSK                                                                                                                                                                                                           | 3                                                        | 545.274                                                                                                                          |
|    |             |            |          | ADI47586.1 | metalloproteinase [Echis carinatus sochurek]              | P-III svMP | 2  | 5  | 69.1 | 14.58  | 3241822.813 | 0.00066366 | 2.693E-05 | GMVEPGTK                                                                                                                                                                                                                  | 2                                                        | 409.708                                                                                                                          |
|    |             |            |          |            |                                                           |            |    |    |      |        |             |            |           |                                                                                                                                                                                                                           |                                                          |                                                                                                                                  |
| 24 | 54,43,27    | 54,43      | 0.023195 | CAQ72894.1 | L-amino oxidase [Echis ocellatus]                         | LAO        | 2  | 12 | 56.5 | 47.27  | 49404091    | 0.02476954 | 0.0005745 | DIVVVGAGMSGLSAAYVLAGAG<br>HK<br>YDTYSTK<br>KFWEDDGIQGGK<br>DIVVVGAGMSGLSAAYVLAGAG                                                                                                                                         | 3<br>2<br>3                                              | 748.4<br>439.2<br>460.556                                                                                                        |
|    |             |            |          | JAC96580.1 | L-amino acid oxidase B variant 1 [Echis coloratus]        | LAO        | 3  | 20 | 56.7 | 36.34  | 210925437.6 | 0.10575089 | 0.0024529 | HK<br>IYFAGEYTANAHGWIDSTIK<br>EADYEEFLEIAR                                                                                                                                                                                | 3<br>2<br>2                                              | 748.4<br>753.036<br>742.85                                                                                                       |
|    |             |            |          | ADI47655.1 | metalloproteinase [Echis coloratus]                       | P-III svMP | 2  | 2  | 68.8 | 26.52  | 1671499452  | 0.83803339 | 0.0194382 | KENDVPIPCAQEDIK<br>ENDVPIPCAQEDIK                                                                                                                                                                                         | 2<br>2                                                   | 878.927<br>814.878                                                                                                               |
|    |             |            |          | ADW54338.1 | group III snake venom metalloproteinase [Echis ocellatus] | P-III svMP | 3  | 5  | 72.8 | 16.21  | 23980659.38 | 0.01202309 | 0.0002789 | ANEEDKGMVDEGTK                                                                                                                                                                                                            | 2                                                        | 762.33                                                                                                                           |
|    |             |            |          | ADI47580.1 | metalloproteinase [Echis carinatus sochurek]              | P-III svMP | 2  | 4  | 68.2 | 4.38   | 38740300    | 0.01942308 | 0.0004505 | TDIVSPQVCGNGLLEK<br>YNDLTAMR                                                                                                                                                                                              | 2<br>2                                                   | 866.427<br>549.257                                                                                                               |
| 25 | 120, 65, 30 | 65, 54, 30 | 0.018604 | ADI47586.1 | metalloproteinase [Echis carinatus sochurek]              | P-III svMP | 11 | 25 | 69.1 | 224.91 | 6882752714  | 0.34234281 | 0.0063689 | IPCAPEDVK<br>LYCFDNLPEHK<br>GMVEPGTK<br>SIQEASQLNLTPEQQR<br>LSDLLNR<br>LSDLLNR<br>IYEIINLNAIYR<br>TNWESDK<br>AFHMHVALVFLEIWSNGDK<br>KMPQCILK<br>YNNYKEDPYTK                                                               | 2<br>2<br>2<br>2<br>2<br>2<br>2<br>2<br>2<br>2<br>2<br>3 | 514.757<br>718.338<br>409.707<br>921.971<br>415.74<br>494.282<br>804.462<br>440.196<br>744.043<br>509.285<br>478.889             |
|    |             |            |          | JAC96587.1 | Phospholipase B [Echis coloratus]                         | PLB        | 16 | 31 | 64.5 | 160.84 | 2600921908  | 0.12936785 | 0.0024068 | VLPGYENIYFAHSSWFTYAATLR<br>QVVPESLFAWER<br>TWAQIFEK<br>SLEDGTLYIEIQIPK<br>SLEDGTLYIEIQIPKLVK<br>LGLFESYEMAPR<br>ENSGTYNNQYMILDTK<br>ENSGTYNNQYMILDTKK<br>HGYWPSYNIPIPHK<br>HQSLPESYNFDFVTMKPVL<br>IANMMADSGK<br>YSDQTEVLR | 3<br>2<br>2<br>3<br>2<br>2<br>3<br>3<br>3<br>2<br>2<br>2 | 902.784<br>730.879<br>511.769<br>859.964<br>687.061<br>706.847<br>945.931<br>673.654<br>549.269<br>751.373<br>527.239<br>555.775 |
|    |             |            |          | ADI47725.1 | metalloproteinase, partial [Echis carinatus sochurek]     | P-II svMP  | 2  | 9  | 27.7 | 153.92 | 10076285143 | 0.50118665 | 0.0093241 | ERDLLNR<br>RDLINVVSSSIDTLR<br>DLINVVSSSIDTLR                                                                                                                                                                              | 2<br>3<br>2                                              | 458.255<br>563.316<br>766.423                                                                                                    |
|    |             |            |          | JAC96580.1 | L-amino acid oxidase B variant 1 [Echis coloratus]        | LAO        | 3  | 21 | 56.7 | 40.68  | 271863585.7 | 0.01352228 | 0.0002516 | YDTYSTK<br>DIVVVGAGMSGLSAAYVLAGAG<br>HK<br>STDLPSR<br>EADYEEFLEIAR                                                                                                                                                        | 2<br>3<br>3<br>2                                         | 439.2<br>748.401<br>438.725<br>742.849                                                                                           |
|    |             |            |          | CAJ55261.1 | renin-like aspartic protease [Echis ocellatus]            | AsP        | 3  | 10 | 43.8 | 24.88  | 220276875   | 0.0109564  | 0.0002038 | ITLTYGQGYIEGFLSQDIVR<br>YDSSESSTYKPK                                                                                                                                                                                      | 3<br>3                                                   | 758.401<br>464.549                                                                                                               |
|    |             |            |          | ADI47581.1 | metalloproteinase [Echis carinatus sochurek]              | P-III svMP | 3  | 6  | 70.3 | 43.8   | 11280783    | 0.0005611  | 1.044E-05 | GMVEPGTK<br>IPCAPQDVK                                                                                                                                                                                                     | 2<br>2                                                   | 409.707<br>514.757                                                                                                               |
|    |             |            |          | ADI47655.1 | metalloproteinase [Echis coloratus]                       | P-III svMP | 2  | 5  | 68.8 | 6.39   | 7178044     | 0.00035703 | 6.642E-06 | VYEMINTVNEIYIMHIR<br>KENDVPIPCAQEDIK                                                                                                                                                                                      | 3<br>2                                                   | 767.717<br>878.916                                                                                                               |

Supplementary Table 3: Assignment of peptides sequenced from MS/MS spectra against protein database from *Echis* genus for ECVRAJ. Relative abundance of each protein from HPLC fractions were estimated by taking sum of precursor abundance of all peptides matched to respective proteins.

| Peak no. | Molecular wt by SDS-PAGE |                    | Peak fraction | Protein Information |                                                                     |                        |                   |              |          |                  |                              |                    | Peptide Information           |          |        |
|----------|--------------------------|--------------------|---------------|---------------------|---------------------------------------------------------------------|------------------------|-------------------|--------------|----------|------------------|------------------------------|--------------------|-------------------------------|----------|--------|
|          | Reducin g (-kDa)         | Non-reducing(-kDa) |               | Accession           | Description                                                         | Toxin family           | # Unique Peptides | Coverage [%] | MW [kDa] | Score Sequest HT | Sum of precursors Abundances | Relative abundance | Relative fraction of proteins | Sequence | Charge |
| 1 to 3   | n.f                      | n.f                |               | P0C6R5.1            | Disintegrin multisquamatin                                          | Disintegrin            | 2                 | 100          | 5.7      | 171.22           | 3369579891                   | 0.37427213         | EGEECESGPCCRNCK               | 3        | 624.89 |
|          |                          |                    |               | P17347.2            | Disintegrin echistatin-alpha                                        | Disintegrin            | 1                 | 100          | 5.4      | 174.66           | 164455427.9                  | 0.01826669         | EGEECESGPCCR                  | 2        | 735.26 |
|          |                          |                    |               | ADI47725.1          | Disintegrin domain of metalloproteinase [Echis carinatus sochureki] | DIS domain (P-II svMP) | 6                 | 6            | 55.4     | 150.65           | 5468985909                   | 0.60746118         | QCESGPCCR                     | 2        | 578.2  |
|          |                          |                    |               |                     |                                                                     |                        |                   |              |          |                  |                              |                    | FLKEGTICKR                    | 2        | 626.84 |
|          |                          |                    |               |                     |                                                                     |                        |                   |              |          |                  |                              |                    | FLKEGTICK                     | 2        | 548.3  |
| 7        | 14                       | 14                 | 0.2164        | pdbj2QHE A          | A Chain A, Phospholipase A2                                         | PLA2                   | 6                 | 38           | 13.8     | 46.63            | 3778025750                   | 1                  | GPPLDATDR                     | 2        | 471.24 |
|          |                          |                    |               |                     |                                                                     |                        |                   |              |          |                  |                              |                    | MIQETGK                       | 2        | 460.25 |
|          |                          |                    |               |                     |                                                                     |                        |                   |              |          |                  |                              |                    | NLNTYNK                       | 2        | 433.72 |
|          |                          |                    |               |                     |                                                                     |                        |                   |              |          |                  |                              |                    | SVVELGKMIQETGK                | 3        | 544.64 |
| 8        | 14                       | 14                 | 0.0367        | AAP41217.1          | phospholipase A2 [Echis carinatus]                                  | PLA2                   | 2                 | 12           | 15.5     | 1.92             | 10790134.75                  | 0.04087616         | EAAICLGENVNTYDKK              | 3        | 608.96 |
|          |                          |                    |               | pdbj2QHE A          | A Chain A, Phospholipase A2                                         | PLA2                   | 4                 | 25           | 13.8     | 11.51            | 253181238                    | 0.95912384         | GPPLDATDR                     | 2        | 471.24 |
|          |                          |                    |               |                     |                                                                     |                        |                   |              |          |                  |                              |                    | MIQETGK                       | 2        | 460.25 |
|          |                          |                    |               |                     |                                                                     |                        |                   |              |          |                  |                              |                    | NLNTYNK                       | 2        | 433.72 |
| 9        | 27                       | 27                 | 0.0239        | ADI47565.1          | serine protease, partial [Echis carinatus sochureki]                | svSP                   | 2                 | 13           | 26.2     | 6.26             | 115729696.8                  | 0.00479502         | IMGWGTITTTK                   | 2        | 612.82 |
|          |                          |                    |               | ADI47559.1          | serine protease, partial [Echis coloratus]                          | svSP                   | 2                 | 9            | 29       | 5.75             | 255114510.6                  | 0.01057014         | NENEEMRVPAAEK                 | 3        | 488.22 |
|          |                          |                    |               | pdbj2QHE A          | A Chain A, Phospholipase A2                                         | PLA2                   | 3                 | 20           | 13.8     | 3.94             | 10741739                     | 0.00044506         | IKLGVHMK                      | 2        | 454.79 |
|          |                          |                    |               | P0DMT4.1            | Cysteine-rich venom protein                                         | CRISP                  | 13                | 38           | 24.7     | 254.15           | 23753804045                  | 0.98418977         | IMGWGTITTTK                   | 2        | 612.82 |
|          |                          |                    |               |                     |                                                                     |                        |                   |              |          |                  |                              |                    | WDKDIMLIR                     | 3        | 402.55 |
|          |                          |                    |               |                     |                                                                     |                        |                   |              |          |                  |                              |                    | NLNTYNK                       | 2        | 433.72 |
|          |                          |                    |               |                     |                                                                     |                        |                   |              |          |                  |                              |                    | GPPLDATDR                     | 2        | 471.24 |
|          |                          |                    |               |                     |                                                                     |                        |                   |              |          |                  |                              |                    | SVNPTASNMLRMEWYPEAAAN         | 2        | 471.24 |
|          |                          |                    |               |                     |                                                                     |                        |                   |              |          |                  |                              |                    | AER                           | 3        | 908.75 |
|          |                          |                    |               |                     |                                                                     |                        |                   |              |          |                  |                              |                    | SVNPTASNMLR                   | 2        | 603.3  |
|          |                          |                    |               |                     |                                                                     |                        |                   |              |          |                  |                              |                    | RSVNPTASNMLR                  | 3        | 454.57 |
|          |                          |                    |               |                     |                                                                     |                        |                   |              |          |                  |                              |                    | NVDFDSESPR                    | 2        | 583.75 |
|          |                          |                    |               |                     |                                                                     |                        |                   |              |          |                  |                              |                    | WTAIHK                        | 2        | 434.76 |
|          |                          |                    |               |                     |                                                                     |                        |                   |              |          |                  |                              |                    | MEWYPEAAANAER                 | 2        | 777.34 |
|          |                          |                    |               |                     |                                                                     |                        |                   |              |          |                  |                              |                    | WTAIHKWHDEK                   | 3        | 521.94 |
| 10       | 32,30, and               | 43,35,33           | 0.0522        | P0DMT4.1            | Cysteine-rich venom protein                                         | CRISP                  | 11                | 26           | 24.7     | 232.14           | 18266910115                  | 0.88775409         | KPEIQNEIIDLHNSLR              | 3        | 640.35 |
|          |                          |                    |               |                     |                                                                     |                        |                   |              |          |                  |                              |                    | SVNPTASNMLR                   | 3        | 402.54 |
|          |                          |                    |               |                     |                                                                     |                        |                   |              |          |                  |                              |                    | RSVNPTASNMLR                  | 3        | 454.57 |
|          |                          |                    |               |                     |                                                                     |                        |                   |              |          |                  |                              |                    | NVDFDSESPR                    | 2        | 583.75 |
|          |                          |                    |               |                     |                                                                     |                        |                   |              |          |                  |                              |                    | MEWYPEAAANAER                 | 3        | 518.56 |
|          |                          |                    |               |                     |                                                                     |                        |                   |              |          |                  |                              |                    | WTAIHK                        | 2        | 434.76 |
|          |                          |                    |               | ADI47565.1          | serine protease, partial [Echis carinatus sochureki]                | svSP                   | 6                 | 21           | 26.2     | 30.23            | 1732192482                   | 0.08418287         | IMGWGTITTTK                   | 2        | 604.82 |
|          |                          |                    |               |                     |                                                                     |                        |                   |              |          |                  |                              |                    | NENEEMR                       | 2        | 461.68 |
|          |                          |                    |               |                     |                                                                     |                        |                   |              |          |                  |                              |                    | NVRNENEEMR                    | 3        | 431.52 |
|          |                          |                    |               |                     |                                                                     |                        |                   |              |          |                  |                              |                    | NENEEMRVPAAEK                 | 3        | 488.55 |
|          |                          |                    |               |                     |                                                                     |                        |                   |              |          |                  |                              |                    | IKLGVHMK                      | 2        | 454.79 |
|          |                          |                    |               | ADI47573.1          | serine protease, partial [Echis carinatus sochureki]                | svSP                   | 5                 | 28           | 25.5     | 10.73            | 283308781.8                  | 0.01376853         | IYFGLHNLK                     | 2        | 552.81 |
|          |                          |                    |               | ADI47559.1          | serine protease, partial [Echis coloratus]                          | svSP                   | 2                 | 12           | 29       | 13.57            | 294131520.4                  | 0.01429451         | LDKPVTSSTHIAPISLSPSPSVG       | 3        | 963.84 |
|          |                          |                    |               |                     |                                                                     |                        |                   |              |          |                  |                              |                    | SVCR                          | 3        | 963.84 |
|          |                          |                    |               |                     |                                                                     |                        |                   |              |          |                  |                              |                    | IMGWGTITTTK                   | 2        | 604.82 |
|          |                          |                    |               |                     |                                                                     |                        |                   |              |          |                  |                              |                    | WDKDIMLIR                     | 2        | 595.32 |
| 12       | 43,27                    | 43,16, and         | 0.0141        | Q9PSM9.1            | Snaclec coagulation factor IX/factor X-binding protein subunit A    | Snaclec                | 3                 | 17           | 15.4     | 1.63             | 414222934.3                  | 0.6627607          | VFNEYK                        | 2        | 400.2  |
|          |                          |                    |               | P0DMT4.1            | Cysteine-rich venom protein                                         | CRISP                  | 7                 | 26           | 24.7     | 29.62            | 154427512.3                  | 0.24708551         | MEWYPEAAANAER                 | 2        | 769.34 |
|          |                          |                    |               |                     |                                                                     |                        |                   |              |          |                  |                              |                    | NVDFDSESPR                    | 2        | 583.26 |
|          |                          |                    |               |                     |                                                                     |                        |                   |              |          |                  |                              |                    | SVNPTASNMLR                   | 2        | 595.3  |
|          |                          |                    |               | ADI47550.1          | serine protease, partial [Echis carinatus sochureki]                | svSP                   | 2                 | 12           | 25.5     | 6.51             | 56345776                     | 0.09015379         | IMGWGSIIISPNEK                | 2        | 716.37 |
| 13       | 27                       | 16,14              | 0.0165        | Q9PSM9.1            | Snaclec coagulation factor IX/factor X-binding protein subunit A    | Snaclec                | 4                 | 20           | 15.4     | 5.35             | 657686593.1                  | 0.36975271         | VFNEYK                        | 2        | 400.69 |
|          |                          |                    |               | pdbj2QHE A          | A Chain A, Phospholipase A2                                         | PLA2                   | 3                 | 20           | 13.8     | 5.32             | 17687093.44                  | 0.00994372         | NLNTYNK                       | 2        | 433.72 |

|    |           |            |        |                                      |                                                                                                                     |                            |             |                |                      |                      |                                           |                                        |                                    |                                                                                                   |                                 |                                                                   |
|----|-----------|------------|--------|--------------------------------------|---------------------------------------------------------------------------------------------------------------------|----------------------------|-------------|----------------|----------------------|----------------------|-------------------------------------------|----------------------------------------|------------------------------------|---------------------------------------------------------------------------------------------------|---------------------------------|-------------------------------------------------------------------|
|    |           |            |        | ADI47550.1                           | serine protease, partial [Echis carinatus sochureki]                                                                | svSP                       | 8           | 38             | 25.5                 | 54.65                | 1103346469                                | 0.62030357                             | 0.0102468                          | MSYVPHCANINILR<br>FFCLPSR<br>IMGWGSIIISPNEK<br>NSAHIAPLHLPSNPPR                                   | 3<br>2<br>2<br>3                | 563.29<br>463.73<br>716.37<br>574.31                              |
| 14 | 27        | 16, 14     | 0.0592 | ADI47565.1<br>pdb 1V7P B<br>P81017.1 | serine protease, partial [Echis carinatus sochureki]<br>B Chain B, Ems16 B Chain<br>Snaclec echicetin subunit alpha | svSP<br>Snaclec<br>Snaclec | 3<br>3<br>5 | 15<br>23<br>23 | 26.2<br>15.1<br>15.8 | 1.61<br>3.39<br>8.23 | 96630215.38<br>10146904.81<br>60093428.94 | 0.09381181<br>0.00985095<br>0.05834069 | 0.005553<br>0.0005831<br>0.0034534 | NENEEMRVPAEK<br>LASHISSEEEAFVSK<br>SAIEDRVWIGLR<br>TWDEAEK                                        | 3<br>3<br>3<br>2                | 488.22<br>545.27<br>472.26<br>439.7                               |
|    |           |            |        | Q9PSM9.1                             | Snaclec coagulation factor IX/factor X-binding protein subunit A                                                    | Snaclec                    | 4           | 29             | 15.4                 | 1.69                 | 566208804.5                               | 0.54969426                             | 0.0325381                          | VFNEYK                                                                                            | 2                               | 400.2                                                             |
|    |           |            |        | ADI47550.1                           | serine protease, partial [Echis carinatus sochureki]                                                                | svSP                       | 3           | 18             | 25.5                 | 17.79                | 296963798                                 | 0.28830229                             | 0.0170655                          | IMGWGSIIISPNEK<br>NSAHIAPLHLPSNPPR                                                                | 2<br>3                          | 716.37<br>574.31                                                  |
| 15 | 28,27     | 16,15,and  | 0.0111 | pdb 1V7P B<br>P81017.1               | B Chain B, Ems16 B Chain<br>Snaclec echicetin subunit alpha                                                         | Snaclec<br>Snaclec         | 3<br>2      | 23<br>7        | 15.1<br>15.8         | 3.86<br>3.3          | 8884516.375<br>56612494                   | 0.1147247<br>0.73103038                | 0.0012717<br>0.0081035             | LASHISSEEEAFVSK<br>TWDEAEK                                                                        | 2<br>2                          | 817.41<br>439.7                                                   |
|    |           |            |        | ADI47550.1                           | serine protease, partial [Echis carinatus sochureki]                                                                | svSP                       | 2           | 12             | 25.5                 | 5.19                 | 11945043.63                               | 0.15424492                             | 0.0017098                          | NSAHIAPLHLPSNPPR                                                                                  | 3                               | 574.31                                                            |
| 16 | 43, 27    | 43,16,14   | 0.0327 | P81017.1<br>pdb 1V7P B               | Snaclec echicetin subunit alpha<br>B Chain B, Ems16 B Chain                                                         | Snaclec<br>Snaclec         | 2<br>5      | 9<br>43        | 16.7<br>15.1         | 5.59<br>10.47        | 119865736.1<br>89183464.5                 | 0.38718706<br>0.28807802               | 0.0126494<br>0.0094115             | TWADAEK<br>LASHISSEEEAFVSK                                                                        | 2<br>2                          | 410.7<br>817.41                                                   |
|    |           |            |        | Q9PSM9.1                             | Snaclec coagulation factor IX/factor X-binding protein subunit A                                                    | Snaclec                    | 4           | 28             | 15.4                 | 2.07                 | 81408254.69                               | 0.26296274                             | 0.008591                           | VFNEYK                                                                                            | 2                               | 400.2                                                             |
|    |           |            |        | pdb 2QHE A                           | A Chain A, Phospholipase A2                                                                                         | PLA2                       | 2           | 14             | 13.8                 | 5.63                 | 12533144.75                               | 0.04048423                             | 0.0013226                          | GPPLDATDR                                                                                         | 2                               | 471.24                                                            |
|    |           |            |        | ADI47589.1                           | metalloproteinase [Echis carinatus sochureki]                                                                       | P-III svMP                 | 2           | 4              | 68.4                 | 7.12                 | 6590345.875                               | 0.02128796                             | 0.0006955                          | SVGIEDHSPIVR                                                                                      | 3                               | 469.92                                                            |
| 17 | 43,30,27  | 43, 18,16, | 0.0076 | P81017.1                             | Snaclec echicetin subunit alpha                                                                                     | Snaclec                    | 14          | 63             | 15.8                 | 28.44                | 697424185.1                               | 0.14861333                             | 0.0011351                          | VWIGLRDR<br>TWDEAEK<br>SAIEDRVWIGLRDR<br>SAIEDRVWIGLR<br>YCNQWDGGHLVSIENAK<br>LKTWDEAEK<br>CFVLER | 2<br>2<br>3<br>3<br>3<br>2<br>2 | 508.29<br>439.7<br>562.64<br>472.26<br>693.32<br>560.29<br>412.21 |
|    |           |            |        | pdb 1V7P B                           | B Chain B, Ems16 B Chain                                                                                            | Snaclec                    | 9           | 63             | 15.1                 | 38.97                | 1908092381                                | 0.40659326                             | 0.0031056                          | WEWSDNAR<br>RRPYCTVMVVKPDR<br>RPYCTVMVVKPDR<br>IFWFTR<br>LASHISSEEEAFVSK<br>FTSMWIGLNNPWK         | 2<br>3<br>3<br>2<br>2<br>2      | 532.23<br>592.98<br>540.95<br>435.24<br>817.41<br>805.39          |
|    |           |            |        | JAC96617.1                           | C-type lectin J [Echis coloratus]                                                                                   | Snaclec                    | 6           | 28             | 18.3                 | 18.09                | 847234133.1                               | 0.18053617                             | 0.0013789                          | TWFNLR<br>SSADYVWIGLWNKR<br>SSADYVWIGLWNK<br>NCFGLEK                                              | 2<br>3<br>2<br>2                | 418.72<br>565.63<br>769.89<br>434.21                              |
|    |           |            |        | Q9PSM9.1                             | Snaclec coagulation factor IX/factor X-binding protein subunit A                                                    | Snaclec                    | 3           | 18             | 15.4                 | 4.97                 | 138943242.6                               | 0.02960726                             | 0.0002261                          | VFNEYKTKWK<br>VFNEYK                                                                              | 3<br>2                          | 405.54<br>400.2                                                   |
|    |           |            |        | pdb 2QHE A                           | A Chain A, Phospholipase A2                                                                                         | PLA2                       | 4           | 25             | 13.8                 | 7.77                 | 29176727.09                               | 0.00621724                             | 4.749E-05                          | NLNTYNK<br>GPPLDATDR                                                                              | 2<br>2                          | 433.72<br>471.24                                                  |
|    |           |            |        | ADI47570.1                           | serine protease, partial [Echis coloratus]                                                                          | svSP                       | 2           | 5              | 26.4                 | 5.48                 | 408059312                                 | 0.0869529                              | 0.0006641                          | EAYGGLPEKSR<br>EAYGGLPEK                                                                          | 2<br>2                          | 603.81<br>482.24                                                  |
|    |           |            |        | JAC96622.1                           | C-type lectin E, partial [Echis coloratus]                                                                          | Snaclec                    | 3           | 19             | 11.6                 | 1.63                 | 663947624.5                               | 0.14147985                             | 0.0010806                          | MCOGLAK<br>IIVVNWK                                                                                | 2<br>2                          | 404.2<br>468.27                                                   |
| 18 | 54, 27,16 | 54, 16,14  | 0.0428 | ADI47570.1                           | serine protease, partial [Echis coloratus]                                                                          | svSP                       | 2           | 5              | 26.4                 | 1.95                 | 190796042.1                               | 0.28565293                             | 0.0122157                          | EAYGGLPEKSR<br>EAYGGLPEK                                                                          | 3<br>2                          | 402.88<br>482.25                                                  |
|    |           |            |        | P81017.1                             | Snaclec echicetin subunit alpha                                                                                     | Snaclec                    | 2           | 7              | 15.8                 | 3.52                 | 133280291.7                               | 0.19954243                             | 0.0085332                          | TWDEAEK                                                                                           | 2                               | 439.7                                                             |
|    |           |            |        | ADI47577.1                           | metalloproteinase [Echis carinatus sochureki]                                                                       | P-III svMP                 | 2           | 5              | 68.1                 | 12.87                | 127216295.4                               | 0.19046363                             | 0.008145                           | YNNDLTAMR<br>HPYGDGEMVEPGTK<br>HPYGDGEMVEPGTK                                                     | 2<br>3<br>3                     | 549.26<br>511.56<br>506.23                                        |
|    |           |            |        | pdb 1V7P B                           | B Chain B, Ems16 B Chain                                                                                            | Snaclec                    | 3           | 23             | 15.1                 | 4.51                 | 94057635.5                                | 0.14081969                             | 0.006022                           | IFWFTR<br>LASHISSEEEAFVSK                                                                         | 2<br>3                          | 435.24<br>545.27                                                  |
|    |           |            |        | JAC96622.1                           | C-type lectin E, partial [Echis coloratus]                                                                          | Snaclec                    | 2           | 8              | 18.2                 | 1.61                 | 84579847.41                               | 0.12662989                             | 0.0054152                          | IIVVNWK                                                                                           | 2                               | 468.27                                                            |
|    |           |            |        | CAQ2894.1                            | L-amino oxidase [Echis ocellatus]                                                                                   | LAAO                       | 3           | 10             | 56.5                 | 15.64                | 34878139.02                               | 0.05221829                             | 0.0022331                          | YDTYSTK<br>AVEELKR                                                                                | 2<br>2                          | 439.2<br>422.75                                                   |
|    |           |            |        | ADI47589.1                           | metalloproteinase [Echis carinatus sochureki]                                                                       | P-III svMP                 | 2           | 6              | 68.4                 | 11.28                | 3121332.75                                | 0.00467315                             | 0.0001998                          | YNNDLTAMR<br>SVGIEDHSPIVR                                                                         | 2<br>3                          | 549.26<br>469.92                                                  |
| 19 | 91        | 18, 14     | 0.0286 | JAC96617.1                           | C-type lectin J [Echis coloratus]                                                                                   | Snaclec                    | 6           | 22             | 18.3                 | 14.19                | 2510163003                                | 0.44192263                             | 0.0126262                          | TWFNLR<br>SSADYVWIGLWNKR                                                                          | 2<br>3                          | 418.72<br>565.63                                                  |

|    |          |          |        |                                        |                                                                                                                                              |                                  |             |              |                      |                       |                                           |                                        |                                     |                                                                                                                                   |                                      |                                                                             |
|----|----------|----------|--------|----------------------------------------|----------------------------------------------------------------------------------------------------------------------------------------------|----------------------------------|-------------|--------------|----------------------|-----------------------|-------------------------------------------|----------------------------------------|-------------------------------------|-----------------------------------------------------------------------------------------------------------------------------------|--------------------------------------|-----------------------------------------------------------------------------|
|    |          |          |        | pdb 1V7P B                             | B Chain B, Ems16 B Chain                                                                                                                     | Snaclec                          | 7           | 52           | 15.1                 | 26.86                 | 1595846886                                | 0.28095421                             | 0.0080271                           | SSADYVWIGLWNK<br>NCFGLEK<br>WEWSDNAR<br>IFWFTR<br>LASHSSEEEAFVSKLASK<br>LASHSSEEEAFVSK<br>FTSMWIGLNNPWK<br>DIVVVGAGMSGLSAAYVLAGAG | 3<br>2<br>2<br>2<br>3<br>2<br>2      | 513.59<br>434.21<br>532.23<br>435.24<br>678.36<br>817.41<br>797.4           |
|    |          |          |        | JAC96580.1                             | L-amino acid oxidase B variant 1 [Echis coloratus]                                                                                           | LAAO                             | 4           | 20           | 56.7                 | 23.74                 | 763686689.9                               | 0.13444961                             | 0.0038414                           | HK<br>YDTYSTK<br>HDDIFAYEK<br>VTVLEASER<br>EADYEEFLEIAR                                                                           | 3<br>2<br>2<br>2<br>2                | 753.73<br>439.2<br>569.26<br>502.28<br>742.85                               |
|    |          |          |        | JAC96622.1<br>ADI47570.1               | C-type lectin E, partial [Echis coloratus]<br>serine protease, partial [Echis coloratus]                                                     | Snaclec<br>svSP                  | 3<br>2      | 19<br>5      | 11.6<br>26.4         | 3.99<br>3.49          | 634243937<br>83349340.94                  | 0.11166078<br>0.01467393               | 0.0031903<br>0.0004192              | IIVNWK<br>EAYGGLPEK                                                                                                               | 2<br>2                               | 468.27<br>482.24                                                            |
|    |          |          |        | ADI47550.1<br>P81017.1                 | serine protease, partial [Echis carinatus sochureki]<br>Snaclec echicetin subunit alpha                                                      | svSP<br>Snaclec                  | 2<br>3      | 12<br>13     | 25.5<br>15.8         | 8.43<br>2.17          | 43304197.75<br>32596107                   | 0.00762385<br>0.00573865               | 0.0002178<br>0.000164               | NSAHIAPLHLPSNPPR<br>VWIGLRDR<br>TWDEAEK                                                                                           | 3<br>2<br>2                          | 574.31<br>508.29<br>439.7                                                   |
|    |          |          |        | pdb 2QHE A<br>CAQ72894.1               | A Chain A, Phospholipase A2<br>L-amino oxidase [Echis ocellatus]                                                                             | PLA2<br>LAAO                     | 2<br>2      | 14<br>14     | 13.8<br>56.5         | 3.41<br>16.8          | 10808751.13<br>6097138.73                 | 0.00190292<br>0.00107342               | 5.437E-05<br>3.067E-05              | MIHQETGK<br>DIVVVGAGMSGLSAAYVLAGAG<br>HK<br>YDTYSTK<br>HDDIFAYEK<br>AVEELKR                                                       | 2<br>3<br>2<br>2<br>2                | 468.25<br>753.73<br>439.2<br>569.26<br>422.75                               |
| 20 | 120,54   | 54       | 0.0033 | ADI47590.1                             | metalloproteinase [Echis carinatus sochureki]                                                                                                | P-III svMP                       | 3           | 12           | 69.5                 | 33.51                 | 1970820103                                | 0.35109331                             | 0.0011758                           | YDYSIEDPNYGMVDEGTK<br>VPLVGMFEWVNRQ<br>KYNGNLR                                                                                    | 3<br>2<br>2                          | 666.93<br>738.38<br>433.23                                                  |
|    |          |          |        | pdb 1V7P B                             | B Chain B, Ems16 B Chain                                                                                                                     | Snaclec                          | 8           | 57           | 15.1                 | 8.52                  | 1034429262                                | 0.18427922                             | 0.0006172                           | WEWSDNAR<br>IFWFTR<br>LASHSSEEEAFVSK<br>FTSMWIGLNNPWK                                                                             | 2<br>2<br>2<br>2                     | 532.23<br>435.24<br>817.41<br>805.4                                         |
|    |          |          |        | JAC96580.1                             | L-amino acid oxidase B variant 1 [Echis coloratus]                                                                                           | LAAO                             | 4           | 21           | 56.7                 | 23                    | 1001413421                                | 0.17839759                             | 0.0005975                           | YDTYSTK<br>HDDIFAYEK<br>HDDIFAYEKR<br>STTDLPSR<br>VTVLEASER<br>EADYEEFLEIAR                                                       | 2<br>2<br>3<br>2<br>2<br>2           | 439.2<br>569.27<br>431.88<br>438.73<br>502.27<br>742.85                     |
|    |          |          |        | ADI47589.1                             | metalloproteinase [Echis carinatus sochureki]                                                                                                | P-III svMP                       | 2           | 5            | 68.4                 | 5.83                  | 730809308.5                               | 0.13019061                             | 0.000436                            | YNNDLTAMR<br>YPYGDGEMVEPGTK                                                                                                       | 2<br>2                               | 549.25<br>771.84                                                            |
|    |          |          |        | ADI47581.1<br>CAQ72894.1               | metalloproteinase [Echis carinatus sochureki]<br>L-amino oxidase [Echis ocellatus]                                                           | P-III svMP<br>LAAO               | 2<br>3      | 5<br>15      | 70.3<br>56.5         | 19.58<br>45.59        | 417349680.6<br>367921195.5                | 0.07434909<br>0.06554361               | 0.000249<br>0.0002195               | VSDLLNR<br>YDTYSTK<br>HDDIFAYEK<br>HDDIFAYEKR<br>STTDLPSR<br>KFWEDDGIQGGK<br>FWEDDGIQGGK<br>AVEELKR                               | 2<br>2<br>3<br>3<br>2<br>2<br>2<br>2 | 408.73<br>439.2<br>569.27<br>431.88<br>438.73<br>460.56<br>626.29<br>422.75 |
|    |          |          |        | ADI47550.1<br>ADI47590.1<br>ADI47643.1 | serine protease, partial [Echis carinatus sochureki]<br>metalloproteinase [Echis carinatus sochureki]<br>metalloproteinase [Echis coloratus] | svSP<br>P-III svMP<br>P-III svMP | 2<br>2<br>2 | 12<br>9<br>5 | 25.5<br>69.2<br>69.3 | 12.44<br>6.87<br>6.81 | 63650935.75<br>25328996.25<br>1656854.563 | 0.01133915<br>0.00451225<br>0.00029516 | 3.797E-05<br>1.511E-05<br>9.885E-07 | NSAHIAPLHLPSNPPR<br>YDYSIEDPNYGMVDEGTK<br>GMVEPGTK                                                                                | 3<br>3<br>2                          | 574.31<br>666.93<br>409.71                                                  |
| 21 | 54,43,33 | Bands as | 0.024  | JAC96580.1                             | L-amino acid oxidase B variant 1 [Echis coloratus]                                                                                           | LAAO                             | 4           | 25           | 56.7                 | 34.55                 | 1844270667                                | 0.48118157                             | 0.0115647                           | YDTYSTK<br>HDDIFAYEK<br>HDDIFAYEKR<br>STTDLPSR<br>VTVLEASER<br>FDEIVGGMDRLPTSMYRAIEK<br>EADYEEFLEIAR                              | 2<br>2<br>3<br>2<br>2<br>3<br>2      | 439.2<br>569.26<br>431.88<br>438.73<br>502.28<br>816.05<br>742.85           |
|    |          |          |        | ADI47589.1                             | metalloproteinase [Echis carinatus sochureki]                                                                                                | P-III svMP                       | 2           | 4            | 68.4                 | 8.48                  | 911661468.8                               | 0.23785809                             | 0.0057167                           | YNNDLTAMR<br>YPYGDGEMVEPGTK                                                                                                       | 2<br>2                               | 549.75<br>771.84                                                            |
|    |          |          |        | ADI47581.1                             | metalloproteinase [Echis carinatus sochureki]                                                                                                | P-III svMP                       | 5           | 10           | 69.8                 | 22.77                 | 593659103.5                               | 0.15488932                             | 0.0037226                           | GMVEPGTK<br>VSDLLNR                                                                                                               | 2<br>2                               | 409.71<br>408.73                                                            |
|    |          |          |        | CAQ72894.1                             | L-amino oxidase [Echis ocellatus]                                                                                                            | LAAO                             | 3           | 19           | 56.5                 | 59.63                 | 375501620.8                               | 0.09797068                             | 0.0023546                           | YDTYSTK                                                                                                                           | 2                                    | 439.2                                                                       |





|  |  |  |  |    |            |                                                                     |            |            |                                               |                                                        |           |             |            |           |                       |            |           |                       |                        |        |        |               |         |        |       |
|--|--|--|--|----|------------|---------------------------------------------------------------------|------------|------------|-----------------------------------------------|--------------------------------------------------------|-----------|-------------|------------|-----------|-----------------------|------------|-----------|-----------------------|------------------------|--------|--------|---------------|---------|--------|-------|
|  |  |  |  |    |            |                                                                     |            |            |                                               |                                                        |           |             |            |           |                       |            |           |                       | DIVVVGAGMSGLSAAYVLAGAG | 3      | 753.73 |               |         |        |       |
|  |  |  |  |    |            |                                                                     |            |            |                                               |                                                        |           |             |            |           |                       |            |           |                       | HK                     | 2      | 441.74 |               |         |        |       |
|  |  |  |  |    |            |                                                                     |            |            |                                               |                                                        |           |             |            |           |                       |            |           |                       | IFLTCTK                | 2      | 439.2  |               |         |        |       |
|  |  |  |  |    |            |                                                                     |            |            |                                               |                                                        |           |             |            |           |                       |            |           |                       | YDTYSTK                | 3      | 508.59 |               |         |        |       |
|  |  |  |  |    |            |                                                                     |            |            |                                               |                                                        |           |             |            |           |                       |            |           |                       | YDTYSTKEYLIK           | 2      | 502.28 |               |         |        |       |
|  |  |  |  |    |            |                                                                     |            |            |                                               |                                                        |           |             |            |           |                       |            |           |                       | VTVLEASER              | 3      | 816.05 |               |         |        |       |
|  |  |  |  |    |            |                                                                     |            |            |                                               |                                                        |           |             |            |           |                       |            |           |                       | FDEIVGGMDRLPTSMYRAIEK  | 3      | 495.57 |               |         |        |       |
|  |  |  |  |    |            |                                                                     |            |            |                                               |                                                        |           |             |            |           |                       |            |           |                       | EADYEEFLEIAR           | 3      | 418.69 |               |         |        |       |
|  |  |  |  |    | ADW54356.1 | group III snake venom metalloproteinase [Echis carinatus sochureki] | P-III svMP | 4          | 5                                             | 68.6                                                   | 14.27     | 81878465.48 | 0.01600841 | 0.0001885 | GMVDEGTK              | 2          | 513.89    |                       | ADEEDKGMVDEGTK         | 3      | 574.31 |               |         |        |       |
|  |  |  |  |    | ADI47550.1 | serine protease, partial [Echis carinatus sochureki]                | svSP       | 2          | 12                                            | 25.5                                                   | 9.74      | 61177548.5  | 0.01196108 | 0.0001409 | NSAHIAPLHLPSPNPPR     | 3          | 408.73    |                       | VSDLLNR                | 2      | 782.73 |               |         |        |       |
|  |  |  |  |    | ADI47581.1 | metalloproteinase [Echis carinatus sochureki]                       | P-III svMP | 3          | 9                                             | 68.7                                                   | 9.79      | 98264614.34 | 0.01921213 | 0.0002263 | SLGMAFVDGMCKPYRSVGLIK | 3          | 492.59    |                       | VPLVGMFEFVNQR          | 2      | 423.72 |               |         |        |       |
|  |  |  |  |    | ADI47590.1 | metalloproteinase [Echis carinatus sochureki]                       | P-III svMP | 4          | 8                                             | 69.5                                                   | 7.07      | 39855067.38 | 0.00779223 | 9.177E-05 | ESDLLNR               | 2          | 435.24    |                       | IFWFTR                 | 2      | 817.41 |               |         |        |       |
|  |  |  |  |    | pdb 1V7P B | B Chain B, Ems16 B Chain                                            | Snaclec    | 3          | 23                                            | 15.1                                                   | 5.89      | 28039594.63 | 0.00548214 | 6.456E-05 | LASHSSEEEAFVSK        | 2          | 406.54    |                       | RFPCAPQDVK             | 3      | 509.26 |               |         |        |       |
|  |  |  |  |    | ADI47593.1 | metalloproteinase, partial [Echis carinatus sochureki]              | P-III svMP | 2          | 11                                            | 28.3                                                   | 4.13      | 32314720    | 0.00631799 | 7.441E-05 | CIFDPPLR              | 2          | 406.54    |                       | RFPCAPQDVK             | 3      | 610.24 |               |         |        |       |
|  |  |  |  |    | ADI47671.1 | metalloproteinase [Echis pyramidum leakeyi]                         | P-III svMP | 2          | 4                                             | 69.9                                                   | 2.42      | 239155718.4 | 0.04675835 | 0.0005507 | NDYSYADENK            | 2          | 400.2     |                       | VFNEYK                 | 2      | 409.71 |               |         |        |       |
|  |  |  |  |    | Q9PSM9.1   | Snaclec coagulation factor IX/factor X-binding protein subunit A    | Snaclec    | 3          | 17                                            | 15.4                                                   | 1.64      | 55928915.16 | 0.0109349  | 0.0001288 | GMVEPGTK              | 3          | 479.95    |                       | VAIADYLIYRK            | 3      | 655.38 |               |         |        |       |
|  |  |  |  | 27 | 120,100,   | 54,43, 16,                                                          | 0.0135     | ADI47586.1 | metalloproteinase [Echis carinatus sochureki] | P-III svMP                                             | 9         | 17          | 69.1       | 17.02     | 412992874.4           | 0.36704951 | 0.0049405 | VAIADYLIYR            | 2                      | 409.71 |        | GMVEPGTK      | 3       | 409.71 |       |
|  |  |  |  |    | ADI47643.1 | metalloproteinase [Echis coloratus]                                 | P-III svMP | 2          | 6                                             | 69.3                                                   | 19.1      | 229455324   | 0.20392958 | 0.0027449 | SVGLVQDHSTTNLR        | 3          | 409.71    |                       | GMVEPGTK               | 2      | 409.71 |               |         |        |       |
|  |  |  |  |    | CAQ72894.1 | L-amino oxidase [Echis ocellatus]                                   | LAAO       | 3          | 13                                            | 56.5                                                   | 17.11     | 147574204.4 | 0.13115732 | 0.0017654 | GSDLLNRK              | 2          | 451.76    |                       | YDTYSTK                | 2      | 439.2  |               |         |        |       |
|  |  |  |  |    | JAC96587.1 | Phospholipase B [Echis coloratus]                                   | PLB        | 9          | 19                                            | 64.5                                                   | 16        | 96687462.25 | 0.08593147 | 0.0011566 | STTDLPSR              | 2          | 438.72    |                       | KFWEDDGIQGGK           | 3      | 460.56 |               |         |        |       |
|  |  |  |  |    | ADI47588.1 | metalloproteinase, partial [Echis carinatus sochureki]              | P-III svMP | 2          | 4                                             | 71.7                                                   | 3.77      | 88884891.66 | 0.0789969  | 0.0010633 | AVEELKR               | 2          | 422.75    |                       | HGYWPSYNIPFHK          | 3      | 549.27 |               |         |        |       |
|  |  |  |  |    | JAC96580.1 | L-amino acid oxidase B variant 1 [Echis coloratus]                  | LAAO       | 2          | 14                                            | 56.7                                                   | 16.74     | 78710248    | 0.06995413 | 0.0009416 | GMVDPGDK              | 2          | 410.7     |                       | YDTYSTK                | 2      | 439.2  |               |         |        |       |
|  |  |  |  |    | pdb 1V7P B | B Chain B, Ems16 B Chain                                            | Snaclec    | 3          | 23                                            | 15.1                                                   | 3.98      | 40841558    | 0.03629814 | 0.0004886 | STTDLPSR              | 2          | 438.72    |                       | IFWFTR                 | 2      | 435.24 |               |         |        |       |
|  |  |  |  |    | JAC96617.1 | C-type lectin J [Echis coloratus]                                   | Snaclec    | 3          | 13                                            | 18.3                                                   | 6         | 30022816.5  | 0.02668293 | 0.0003592 | LASHSSEEEAFVSK        | 2          | 817.4     |                       | TWFNLR                 | 2      | 418.73 |               |         |        |       |
|  |  |  |  | 28 | 120,100,   | 54, 43                                                              | 0.0055     | JAC96587.1 | Phospholipase B [Echis coloratus]             | PLB                                                    | 14        | 23          | 64.5       | 19.83     | 355265392.2           | 0.31210853 | 0.0017153 | VTDMESMK              | 2                      | 478.71 |        | TWAQIFEK      | 2       | 511.77 |       |
|  |  |  |  |    | ADI47586.1 | metalloproteinase [Echis carinatus sochureki]                       | P-III svMP | 10         | 13                                            | 69.1                                                   | 20.25     | 692930544   | 0.60875486 | 0.0033457 | IANMMADSGK            | 2          | 527.24    |                       | ENSGTYNNQYMILDTK       | 3      | 630.96 |               |         |        |       |
|  |  |  |  |    | CAQ72894.1 | L-amino oxidase [Echis ocellatus]                                   | LAAO       | 3          | 7                                             | 56.5                                                   | 4.14      | 33940767.55 | 0.02981772 | 0.0001639 | YNNYKEDPYTK           | 3          | 478.89    |                       | YSDQTEVLR              | 2      | 555.77 |               |         |        |       |
|  |  |  |  |    | ADI47718.1 | metalloproteinase, partial [Echis carinatus sochureki]              | P-II svMP  | 2          | 6                                             | 36.6                                                   | 4.83      | 43355576.84 | 0.03808884 | 0.0002093 | LSDLLNR               | 2          | 415.74    |                       | GMVEPGTK               | 2      | 417.7  |               |         |        |       |
|  |  |  |  |    | JAC96580.1 | L-amino acid oxidase B variant 1 [Echis coloratus]                  | LAAO       | 2          | 7                                             | 56.7                                                   | 3.96      | 12782894.06 | 0.01123006 | 6.172E-05 | DENKGMVEPGTK          | 3          | 435.54    |                       | YDTYSTK                | 2      | 439.2  |               |         |        |       |
|  |  |  |  |    | ADI47718.1 | metalloproteinase, partial [Echis carinatus sochureki]              | P-II svMP  | 4          | 28                                            | 27.7                                                   | 36.94     | 2664060014  | 0.27488    | 0.0050944 | AVEELKR               | 2          | 422.75    |                       | KFWEDDGIQGGK           | 3      | 460.56 |               |         |        |       |
|  |  |  |  |    | 30         | 54,50,24                                                            | 54,50,24   | 0.0185     | ADI47718.1                                    | metalloproteinase, partial [Echis carinatus sochureki] | P-II svMP | 4           | 28         | 27.7      | 36.94                 | 2664060014 | 0.27488   | 0.0050944             | DLINVVSSSDTLR          | 2      | 753.39 |               | YDTYSTK | 2      | 439.2 |
|  |  |  |  |    |            |                                                                     |            |            |                                               |                                                        |           |             |            |           |                       |            |           | ERDLLNR               | 2                      | 458.25 |        | ERDLLNR       | 3       | 889.8  |       |
|  |  |  |  |    |            |                                                                     |            |            |                                               |                                                        |           |             |            |           |                       |            |           | NQYQNYLTIYKQPCILNQPLR | 3                      | 502.6  |        | DLINVVSSSDTLR | 3       | 502.6  |       |

|    |    |    |        |            |                                                                  |            |    |    |      |        |             |            |           |                         |   |        |
|----|----|----|--------|------------|------------------------------------------------------------------|------------|----|----|------|--------|-------------|------------|-----------|-------------------------|---|--------|
|    |    |    |        | ADI47588.1 | metalloproteinase, partial [Echis carinatus sochureki]           | P-III svMP | 15 | 33 | 57.6 | 49.88  | 1598744214  | 0.1649598  | 0.0030572 | DLINVVSSSDTLRSFAEWR     | 3 | 761.39 |
|    |    |    |        |            |                                                                  |            |    |    |      |        |             |            |           | ESVGIVQDHSK             | 2 | 599.81 |
|    |    |    |        |            |                                                                  |            |    |    |      |        |             |            |           | CILNEPLR                | 2 | 507.77 |
|    |    |    |        |            |                                                                  |            |    |    |      |        |             |            |           | YSDVSLDYGMDVPGTK        | 2 | 873.9  |
|    |    |    |        |            |                                                                  |            |    |    |      |        |             |            |           | SADCPDYFHR              | 3 | 456.86 |
|    |    |    |        |            |                                                                  |            |    |    |      |        |             |            |           | DHDNAQLLTGINLNGNTIGYGYV |   |        |
|    |    |    |        |            |                                                                  |            |    |    |      |        |             |            |           | GSMCMKP                 | 3 | 1090.5 |
|    |    |    |        |            |                                                                  |            |    |    |      |        |             |            |           | FATAETVCRPAK            | 3 | 450.9  |
|    |    |    |        |            |                                                                  |            |    |    |      |        |             |            |           | KYTGDTVTAIK             | 2 | 548.3  |
|    |    |    |        |            |                                                                  |            |    |    |      |        |             |            |           | LPIDNTPLCNYR            | 3 | 492.58 |
|    |    |    |        |            |                                                                  |            |    |    |      |        |             |            |           | YTGDTVTAIK              | 2 | 484.26 |
|    |    |    |        |            |                                                                  |            |    |    |      |        |             |            |           | YTGDTVTAIKTR            | 3 | 408.89 |
|    |    |    |        | ADI47725.1 | metalloproteinase, partial [Echis carinatus sochureki]           | P-II svMP  | 2  | 31 | 27.7 | 51.52  | 999634114.3 | 0.10314311 | 0.0019116 | ERDLLNR                 | 2 | 458.25 |
|    |    |    |        |            |                                                                  |            |    |    |      |        |             |            |           | NQYQNYLTNYKPQCIINQPLR   | 3 | 890.12 |
|    |    |    |        |            |                                                                  |            |    |    |      |        |             |            |           | ERDLLNR                 | 2 | 458.25 |
|    |    |    |        |            |                                                                  |            |    |    |      |        |             |            |           | ERDLLNRR                | 2 | 537.29 |
|    |    |    |        | ADI47638.1 | metalloproteinase [Echis coloratus]                              | P-III svMP | 3  | 6  | 70   | 6.9    | 819222476.3 | 0.08452808 | 0.0015666 | YNGNLQK                 | 2 | 419.7  |
|    |    |    |        |            |                                                                  |            |    |    |      |        |             |            |           | FKPAGTECR               | 2 | 533.26 |
|    |    |    |        |            |                                                                  |            |    |    |      |        |             |            |           | RHDNAQLLTAIGFDRPTIGR    | 3 | 751.73 |
|    |    |    |        |            |                                                                  |            |    |    |      |        |             |            |           | HDNAQLLTAIGFDRPTIGR     | 3 | 699.69 |
|    |    |    |        | ADI47641.1 | metalloproteinase [Echis coloratus]                              | P-III svMP | 3  | 11 | 69.2 | 21.83  | 644190795.6 | 0.06646816 | 0.0012319 | ESVGIVQDHSK             | 2 | 599.81 |
|    |    |    |        |            |                                                                  |            |    |    |      |        |             |            |           | CILNEPLR                | 2 | 507.77 |
|    |    |    |        |            |                                                                  |            |    |    |      |        |             |            |           | QRDLLNR                 | 2 | 458.25 |
|    |    |    |        |            |                                                                  |            |    |    |      |        |             |            |           | YSDVALDYGMDVPGTK        | 2 | 873.9  |
|    |    |    |        |            |                                                                  |            |    |    |      |        |             |            |           | AYMNANKFIKLVVDNVMYR     | 3 | 834.77 |
|    |    |    |        | JAC96610.1 | Snake venom metalloproteinase A, partial [Echis coloratus]       | P-I svMP   | 2  | 13 | 13.4 | 17.5   | 619268899.9 | 0.0638967  | 0.0011842 | ENDVLIPCEPEDIK          | 3 | 557.6  |
|    |    |    |        |            |                                                                  |            |    |    |      |        |             |            |           | KENDVLIPCEPEDIK         | 3 | 600.3  |
|    |    |    |        | ADW54330.1 | group I snake venom metalloproteinase, partial [Echis ocellatus] | P-I svMP   | 2  | 4  | 51   | 2.3    | 594776816.5 | 0.06136958 | 0.0011374 | YIQLVIVADHAMVTKK        | 3 | 615.68 |
|    |    |    |        |            |                                                                  |            |    |    |      |        |             |            |           | YIQLVIVADHAMVTK         | 3 | 572.99 |
|    |    |    |        | ADI47590.1 | metalloproteinase [Echis carinatus sochureki]                    | P-III svMP | 2  | 7  | 69.5 | 1.79   | 181002249   | 0.01867597 | 0.0003461 | FKPAGTECR               | 2 | 533.26 |
|    |    |    |        | ADI47732.1 | metalloproteinase [Echis pyramidum leakeyi]                      | P-II svMP  | 2  | 5  | 54.2 | 3.92   | 149600610.8 | 0.01543592 | 0.0002861 | YIQLVIVADHAMITK         | 3 | 577.65 |
|    |    |    |        |            |                                                                  |            |    |    |      |        |             |            |           | SVGIVQDHSK              | 2 | 535.29 |
|    |    |    |        | CAQ72894.1 | L-amino oxidase [Echis ocellatus]                                | LAAO       | 3  | 16 | 56.5 | 8.4    | 93684106.69 | 0.00966641 | 0.0001791 | STDDLPSR                | 2 | 438.73 |
|    |    |    |        |            |                                                                  |            |    |    |      |        |             |            |           | DIVVVGAGMSGLSAAYVLAGAG  |   |        |
|    |    |    |        |            |                                                                  |            |    |    |      |        |             |            |           | HK                      | 3 | 748.4  |
|    |    |    |        |            |                                                                  |            |    |    |      |        |             |            |           | AVEELKR                 | 2 | 422.75 |
|    |    |    |        |            |                                                                  |            |    |    |      |        |             |            |           | KFWEDDGIQGGK            | 3 | 460.56 |
|    |    |    |        | CAJ55261.1 | renin-like aspartic protease [Echis ocellatus]                   | AsP        | 5  | 22 | 43.8 | 2      | 66479435.31 | 0.00685941 | 0.0001271 | ITLTYGGQYIEGFLSQDIVR    | 2 | 1137.1 |
|    |    |    |        | ADI47550.1 | serine protease, partial [Echis carinatus sochureki]             | svSP       | 4  | 27 | 25.5 | 10.66  | 61873664.25 | 0.00638418 | 0.0001183 | MSYVPHCANINILR          | 3 | 563.28 |
|    |    |    |        | JAC96580.1 | L-amino acid oxidase B variant 1 [Echis coloratus]               | LAAO       | 2  | 16 | 56.7 | 10.81  | 53316672    | 0.00550126 | 0.000102  | STDDLPSR                | 2 | 438.73 |
|    |    |    |        |            |                                                                  |            |    |    |      |        |             |            |           | DIVVVGAGMSGLSAAYVLAGAG  |   |        |
|    |    |    |        |            |                                                                  |            |    |    |      |        |             |            |           | HK                      | 3 | 748.4  |
|    |    |    |        | ADI47642.1 | metalloproteinase [Echis coloratus]                              | P-III svMP | 2  | 6  | 69.1 | 8.35   | 35850981    | 0.00369913 | 6.856E-05 | HDNAQLLTGINFKGQTLGR     | 3 | 695.69 |
|    |    |    |        | P81017.1   | Snaclec echicetin subunit alpha                                  | Snaclec    | 7  | 57 | 15.8 | 3.53   | 25825874.5  | 0.00266474 | 4.939E-05 | YCNQWDGGHLVSIENAK       | 3 | 693.32 |
|    |    |    |        | JAC96587.1 | Phospholipase B [Echis coloratus]                                | PLB        | 10 | 20 | 64.5 | 11.21  | 21339833.63 | 0.00220186 | 4.081E-05 | NAGYYIAQLDGLYMGNVWVAK   | 3 | 771.38 |
|    |    |    |        | P0DMT4.1   | Cysteine-rich venom protein                                      | CRISP      | 3  | 18 | 24.7 | 11.72  | 21062289    | 0.00217323 | 4.028E-05 | KPEIQNEIIDLHNSLR        | 3 | 640.35 |
|    |    |    |        | pdb 1V7P B | B Chain B, Ems16 B Chain                                         | Snaclec    | 3  | 27 | 15.1 | 3.64   | 18557195    | 0.00191475 | 3.549E-05 | LASHSSEEEAFVSK          | 2 | 817.41 |
| 31 | 27 | 27 | 0.3747 | ADI47718.1 | metalloproteinase, partial [Echis carinatus sochureki]           | P-II svMP  | 4  | 23 | 27.7 | 119.2  | 7809173608  | 0.49719421 | 0.1863176 | ERDLLNR                 | 2 | 458.25 |
|    |    |    |        |            |                                                                  |            |    |    |      |        |             |            |           | NQYQNYLTIIYKPQCIINQPLR  | 3 | 890.12 |
|    |    |    |        |            |                                                                  |            |    |    |      |        |             |            |           | DLINVVSSSDTLR           | 2 | 753.4  |
|    |    |    |        |            |                                                                  |            |    |    |      |        |             |            |           | DLINVVSSSDTLRSFAEWR     | 3 | 761.38 |
|    |    |    |        | ADW54330.1 | group I snake venom metalloproteinase, partial [Echis ocellatus] | P-I svMP   | 2  | 4  | 51   | 6.18   | 4313636154  | 0.27464045 | 0.1029182 | YIQLVIVADHAMVTK         | 3 | 572.98 |
|    |    |    |        | ADI47725.1 | metalloproteinase, partial [Echis carinatus sochureki]           | P-II svMP  | 4  | 26 | 27.7 | 178.56 | 3466867142  | 0.22072838 | 0.0827153 | ERDLLNR                 | 2 | 458.25 |
|    |    |    |        |            |                                                                  |            |    |    |      |        |             |            |           | NQYQNYLTNYKPQCIINQPLR   | 3 | 890.12 |

|  |  |  |            |                                                        |            |   |    |      |       |             |            |           |                       |   |        |
|--|--|--|------------|--------------------------------------------------------|------------|---|----|------|-------|-------------|------------|-----------|-----------------------|---|--------|
|  |  |  |            |                                                        |            |   |    |      |       |             |            |           | RPHDNAQFLTNINFDDNVIGR | 3 | 819.74 |
|  |  |  | ADI47588.1 | metalloproteinase, partial [Echis carinatus sochureki] | P-III svMP | 4 | 16 | 57.6 | 8.62  | 75413078.25 | 0.0048014  | 0.0017993 | NELWGYFISHTPR         | 3 | 540.6  |
|  |  |  | ADI47641.1 | metalloproteinase [Echis coloratus]                    | P-III svMP | 2 | 9  | 69.2 | 16.61 | 27011498    | 0.00171977 | 0.0006445 | YTGDTVTAIK            | 2 | 484.26 |
|  |  |  | CAQ72894.1 | L-amino oxidase [Echis ocellatus]                      | LAAO       | 3 | 13 | 56.5 | 5.54  | 14383925.14 | 0.0009158  | 0.0003432 | NELWGYFISHTPR         | 3 | 540.6  |
|  |  |  |            |                                                        |            |   |    |      |       |             |            |           | QRDLLNR               | 2 | 458.25 |
|  |  |  |            |                                                        |            |   |    |      |       |             |            |           | KFWEDDGIQGGK          | 3 | 460.56 |

Supplementary Table 4: List of toxin families and unique proteins matched to MS/MS sequenced peptides for ECVTN. Total of 69 unique proteins belonging to 10 toxin families were detected.

#### Snake venom metalloproteinases (svMP)

|            |                                                                        |
|------------|------------------------------------------------------------------------|
| ADI47722.1 | Disintegrin domain of metalloproteinase [Echis carinatus sochureki]    |
| ADI47583.1 | DC domain of metalloproteinase [Echis carinatus sochureki]             |
| ADI47625.1 | DC domain of metalloproteinase [Echis coloratus]                       |
| CAJ01683.1 | DC domain of group III snake venom metalloproteinase [Echis ocellatus] |
| ADI47586.1 | DC domain of metalloproteinase [Echis carinatus sochureki]             |
| ADW54339.1 | group III snake venom metalloproteinase [Echis ocellatus]              |
| CAA55566.1 | metalloprotease, partial [Echis pyramidum]                             |
| ADI47590.1 | metalloproteinase [Echis carinatus sochureki]                          |
| ADI47577.1 | metalloproteinase [Echis carinatus sochureki]                          |
| ADI47580.1 | metalloproteinase [Echis carinatus sochureki]                          |
| ADI47592.1 | metalloproteinase [Echis carinatus sochureki]                          |
| ADI47604.1 | metalloproteinase, partial [Echis carinatus sochureki]                 |
| ADI47596.1 | metalloproteinase, partial [Echis carinatus sochureki]                 |
| ADW54346.1 | group III snake venom metalloproteinase, partial [Echis ocellatus]     |
| ADI47581.1 | metalloproteinase [Echis carinatus sochureki]                          |
| ADW54348.1 | group III snake venom metalloproteinase [Echis ocellatus]              |
| ADI47681.1 | metalloproteinase, partial [Echis pyramidum leakeyi]                   |
| ADI47638.1 | metalloproteinase [Echis coloratus]                                    |
| ADI47626.1 | metalloproteinase [Echis coloratus]                                    |
| ANT80539.1 | venom metalloprotease PIII-SVMP EOC00089 [Echis ocellatus]             |
| ADW54356.1 | group III snake venom metalloproteinase [Echis carinatus sochureki]    |
| ADI47676.1 | metalloproteinase, partial [Echis pyramidum leakeyi]                   |
| ADI47612.1 | metalloproteinase [Echis coloratus]                                    |
| ADI47584.1 | metalloproteinase [Echis carinatus sochureki]                          |
| ADI47593.1 | metalloproteinase, partial [Echis carinatus sochureki]                 |
| ADI47609.1 | metalloproteinase, partial [Echis coloratus]                           |
| ADI47595.1 | metalloproteinase, partial [Echis carinatus sochureki]                 |
| ADI47643.1 | metalloproteinase [Echis coloratus]                                    |
| ADI47634.1 | metalloproteinase [Echis coloratus]                                    |

ADI47594.1 metalloproteinase, partial [Echis carinatus sochureki]  
ADI47585.1 metalloproteinase [Echis carinatus sochureki]  
ADI47725.1 metalloproteinase, partial [Echis carinatus sochureki]  
ADI47654.1 metalloproteinase, partial [Echis coloratus]  
ADI47653.1 metalloproteinase [Echis coloratus]  
ADI47645.1 metalloproteinase [Echis coloratus]  
ADI47641.1 metalloproteinase [Echis coloratus]  
ADI47588.1 metalloproteinase, partial [Echis carinatus sochureki]

### Snaclecs

Q7T248.2 Snaclec echicetin subunit alpha; Flags: Precursor  
JAC96617.1 C-type lectin J [Echis coloratus]  
P81017.1 Snaclec echicetin subunit alpha  
AAB32774.1 echicetin beta subunit[Echis carinatus]  
Q9PSM9.1 Snaclec coagulation factor IX/factor X-binding protein subunit  
pdb|1V7P|B B Chain B, Ems16 B Chain  
BAC77706.1 EMS16 A chain [Echis multisquamatus]  
JAC96622.1 C-type lectin E, partial [Echis coloratus]  
AAP41219.2 echicetin B-chain [Echis carinatus]

### om serine protease (svSP)

ADI47565.1 serine protease, partial [Echis carinatus sochureki]  
ADI47568.1 serine protease, partial [Echis coloratus]  
ADI47566.1 serine protease, partial [Echis coloratus]  
ADI47556.1 serine protease, partial [Echis ocellatus]  
ADI47570.1 serine protease, partial [Echis coloratus]  
ADI47552.1 serine protease, partial [Echis coloratus]  
ADE45140.1 serine protease, partial [Echis ocellatus]  
ADI47574.1 serine protease, partial [Echis coloratus]  
ADI47576.1 serine protease, partial [Echis coloratus]

### Phospholipases

pdb|1OZ6|B A Chain A, Phospholipase A2  
AAN77202.1 acidic phospholipase A2 [Echis carinatus sochureki]  
pdb|2QHE|B A Chain A, Phospholipase A2  
JAC96587.1 Phospholipase B [Echis coloratus]

### L-amino acid oxidase (LAAO)

JAC96580.1 L-amino acid oxidase B variant 1 [Echis coloratus]

CAQ72894.1 L-amino oxidase [Echis ocellatus]

### Hyaluronidase (HYAL)

ABI33941.1 hyaluronidase [Echis pyramidum leakeyi]

ABI33937.1 hyaluronidase [Echis ocellatus]

### Disintegrins

P17347.2 Disintegrin echistatin-alpha

AAW82478.1 Disintegrin, partial [Echis carinatus]

CAJ40966.1 MLD-containing dimeric disintegrin EO5A subunit precursor [Echis ocellatus]

### Aspartic protease (AsP)

CAJ55260.1 renin-like aspartic protease [Echis ocellatus]

### Cysteine-Rich Secretory protein (CRISP)

JAC96631.1 Cysteine-Rich Secretory Protein B [Echis coloratus]

### Nerve growth factor (NGF)

JAC88974.1 nerve growth factor a [Echis coloratus]

Supplementary Table 5: List of toxin families and unique proteins matched to MS/MS sequenced peptides for ECVGO. Total of 38 unique proteins belonging to 8 toxin families were detected.

#### Snake venom metalloproteinases (svMP)

|            |                                                                    |
|------------|--------------------------------------------------------------------|
| ADI47584.1 | metalloproteinase [Echis carinatus sochureki]                      |
| ADI47654.1 | metalloproteinase, partial [Echis coloratus]                       |
| CAJ01689.1 | Group III snake venom metalloproteinase [Echis ocellatus]          |
| ADW54338.1 | group III snake venom metalloproteinase [Echis ocellatus]          |
| ADI47671.1 | metalloproteinase [Echis pyramidum leakeyi]                        |
| ADI47596.1 | metalloproteinase, partial [Echis carinatus sochureki]             |
| ADI47577.1 | metalloproteinase [Echis carinatus sochureki]                      |
| ADI47581.1 | metalloproteinase [Echis carinatus sochureki]                      |
| ADI47590.1 | metalloproteinase [Echis carinatus sochureki]                      |
| ADW54346.1 | group III snake venom metalloproteinase, partial [Echis ocellatus] |
| ADI47648.1 | metalloproteinase [Echis coloratus]                                |
| ADI47585.1 | metalloproteinase [Echis carinatus sochureki]                      |
| ADI47580.1 | metalloproteinase [Echis carinatus sochureki]                      |
| ADI47638.1 | metalloproteinase [Echis coloratus]                                |
| ADI47604.1 | metalloproteinase, partial [Echis carinatus sochureki]             |
| ADI47647.1 | metalloproteinase [Echis coloratus]                                |
| ADI47586.1 | metalloproteinase [Echis carinatus sochureki]                      |
| ADI47655.1 | metalloproteinase [Echis coloratus]                                |
| ADI47725.1 | metalloproteinase, partial [Echis carinatus sochureki]             |

#### Snaclecs

|            |                                                                  |
|------------|------------------------------------------------------------------|
| 1V7P       | B Chain B, Ems16 B Chain                                         |
| JAC96617.1 | C-type lectin J [Echis coloratus]                                |
| Q7T248.2   | Snaclec echicetin subunit alpha; Flags: Precursor                |
| Q9PSM9.1   | Snaclec coagulation factor IX/factor X-binding protein subunit A |
| JAC96622.1 | C-type lectin E, partial [Echis coloratus]                       |
| P81017.1   | Snaclec echicetin subunit alpha                                  |

#### Snake venom serine protease (svSP)

|            |                                                      |
|------------|------------------------------------------------------|
| ADI47565.1 | serine protease, partial [Echis carinatus sochureki] |
| ADI47575.1 | serine protease, partial [Echis carinatus sochureki] |
| ADI47568.1 | serine protease, partial [Echis coloratus]           |

ADI47570.1 serine protease, partial [Echis coloratus]

ADI47576.1 serine protease, partial [Echis coloratus]

#### Phospholipases

1OZ6 A Chain A, Phospholipase A2

JAC96587.1 Phospholipase B [Echis coloratus]

#### L-amino acid oxidase (LAAO)

JAC96580.1 L-amino acid oxidase B variant 1 [Echis coloratus]

CAQ72894.1 L-amino oxidase [Echis ocellatus]

#### Disintegrins

P17347.2 Disintegrin echistatin-alpha

P0C6R5.1 Disintegrin multisquamatin

#### Nerve growth factor (NGF)

JAC88974.1 nerve growth factor a [Echis coloratus]

#### Aspartic protease (AsP)

CAJ55261.1 renin-like aspartic protease [Echis ocellatus]



Supplementary Table 6: List of toxin families and unique proteins matched to MS/MS sequenced peptides for ECVRAJ. Total of 38 unique proteins belonging to 8 toxin families were detected.

#### Snake venom metalloproteinases (svMP)

|            |                                                                     |
|------------|---------------------------------------------------------------------|
| ADI47589.1 | metalloproteinase [Echis carinatus sochureki]                       |
| ADI47577.1 | metalloproteinase [Echis carinatus sochureki]                       |
| ADI47590.1 | metalloproteinase [Echis carinatus sochureki]                       |
| ADI47643.1 | metalloproteinase [Echis coloratus]                                 |
| CAJ01689.1 | Group III snake venom metalloproteinase [Echis ocellatus]           |
| ADI47581.1 | metalloproteinase [Echis carinatus sochureki]                       |
| ADI47593.1 | metalloproteinase, partial [Echis carinatus sochureki]              |
| ADW54356.1 | group III snake venom metalloproteinase [Echis carinatus sochureki] |
| ADI47671.1 | metalloproteinase [Echis pyramidum leakeyi]                         |
| ADI47586.1 | metalloproteinase [Echis carinatus sochureki]                       |
| ADI47718.1 | metalloproteinase, partial [Echis carinatus sochureki]              |
| ADI47588.1 | metalloproteinase, partial [Echis carinatus sochureki]              |
| ADI47725.1 | metalloproteinase, partial [Echis carinatus sochureki]              |
| ADI47638.1 | metalloproteinase [Echis coloratus]                                 |
| ADI47641.1 | metalloproteinase [Echis coloratus]                                 |
| JAC96610.1 | Snake venom metalloproteinase A, partial [Echis coloratus]          |
| ADW54330.1 | group I snake venom metalloproteinase, partial [Echis ocellatus]    |
| ADI47732.1 | metalloproteinase [Echis pyramidum leakeyi]                         |
| ADI47642.1 | metalloproteinase [Echis coloratus]                                 |

#### Snaclecs

|            |                                                                  |
|------------|------------------------------------------------------------------|
| Q9PSM9.1   | Snaclec coagulation factor IX/factor X-binding protein subunit A |
| pdb 1V7P B | B Chain B, Ems16 B Chain                                         |
| P81017.1   | Snaclec echicetin subunit alpha                                  |
| JAC96617.1 | C-type lectin J [Echis coloratus]                                |
| JAC96622.1 | C-type lectin E, partial [Echis coloratus]                       |

#### Snake venom serine protease (svSP)

|            |                                                      |
|------------|------------------------------------------------------|
| ADI47565.1 | serine protease, partial [Echis carinatus sochureki] |
| ADI47559.1 | serine protease, partial [Echis coloratus]           |

ADI47573.1 serine protease, partial [Echis carinatus sochureki]  
ADI47550.1 serine protease, partial [Echis carinatus sochureki]  
ADI47570.1 serine protease, partial [Echis coloratus]

#### Phospholipases

pdb|2QHE|A A Chain A, Phospholipase A2  
AAP41217.1 phospholipase A2 [Echis carinatus]  
JAC96587.1 Phospholipase B [Echis coloratus]

#### L-amino acid oxidase (LAAO)

CAQ72894.1 L-amino oxidase [Echis ocellatus]  
JAC96580.1 L-amino acid oxidase B variant 1 [Echis coloratus]

#### Disintegrins

P0C6R5.1 Disintegrin multisquamatin  
P17347.2 Disintegrin echistatin-alpha

#### Cysteine-Rich Secretory protein (CRISP)

P0DMT4.1 Cysteine-rich venom protein

#### Aspartic protease (AsP)

CAJ55261.1 renin-like aspartic protease [Echis ocellatus]
