# Supplementary material for: Comparative proteomics of geographically distinct saw-scaled viper (Echis carinatus) venoms from India
Source: PubMed Central journal article supplement — Toxicon X. 2020 Jun 23;7:100048. doi: 10.1016/j.toxcx.2020.100048 (PMC7322182; doi:10.1016/j.toxcx.2020.100048), 2020-06-23

Supplementary Figure 1: Toxin sequences are aligned in their respective toxin family using Clustal omega (<https://www.ebi.ac.uk/Tools/seqservices/seqlogo/>) for ECVM. Tryptic peptides detected by MS/MS spectra are highlighted on the protein sequence. **Yellow** highlighted peptides are unique to the isoform. **Green** highlighted peptides share sequences with other isoforms. Differences in the sequences of detected peptides are highlighted by red. Single and double lines under the sequences are used to differentiate between adjacent peptides.

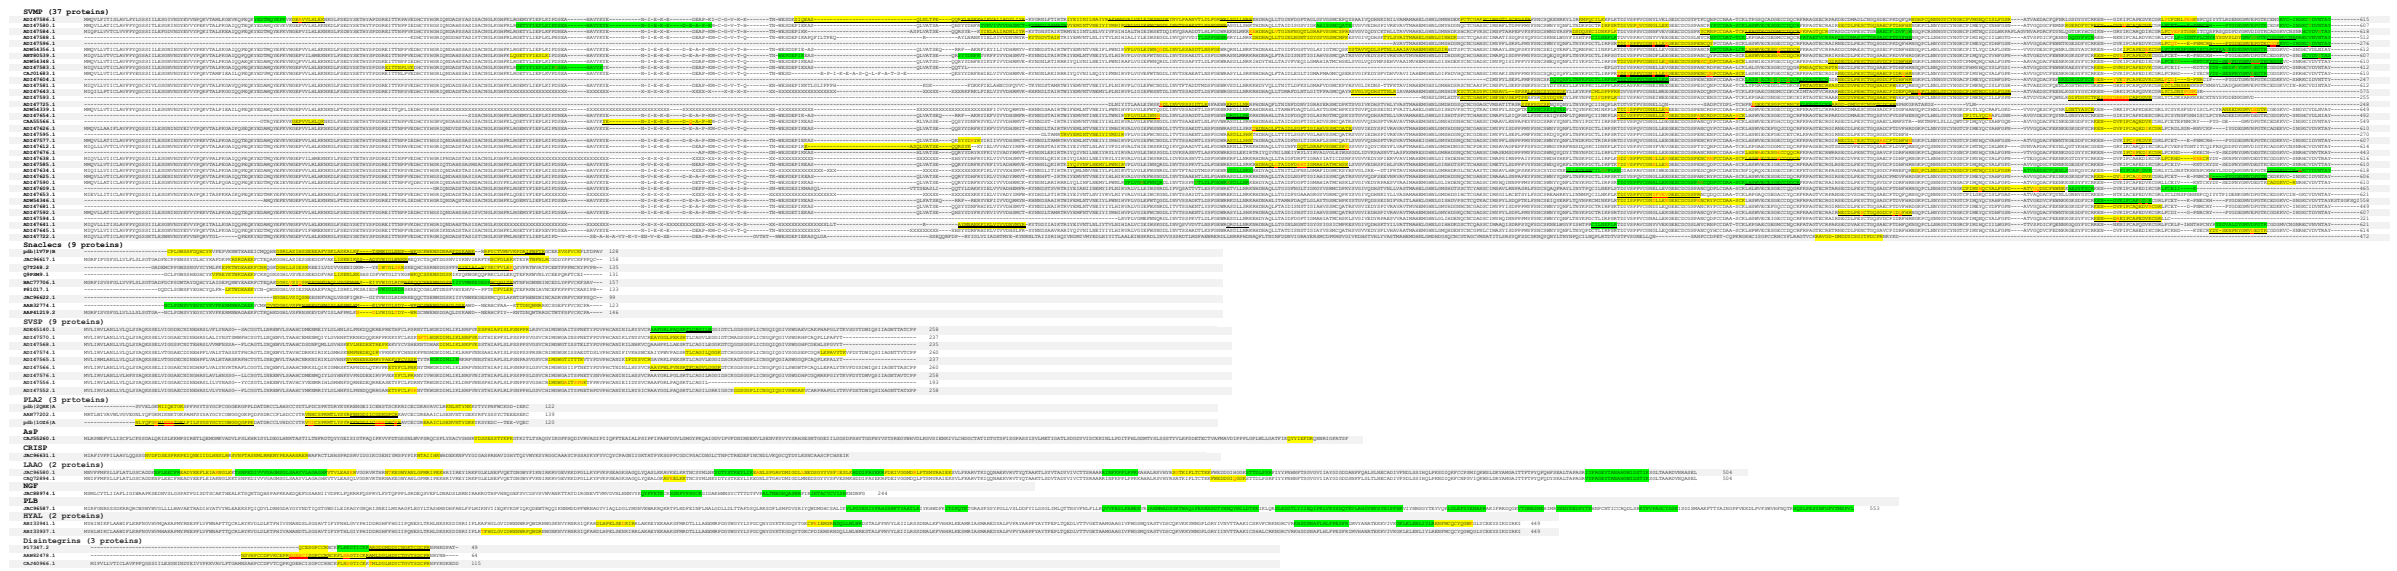

Supplementary Figure 2: Toxin sequences are aligned in their respective toxin family using Clustal omega (<https://www.ebi.ac.uk/Tools/seqservices/seqlogo/>) for ECVM. Tryptic peptides detected by MS/MS spectra are highlighted on the protein sequence. **Yellow** highlighted peptides are unique to the isoform. **Green** highlighted peptides share sequences with other isoforms. Differences in the sequences of detected peptides are highlighted by red. Single and double lines under the sequences are used to differentiate between adjacent peptides.

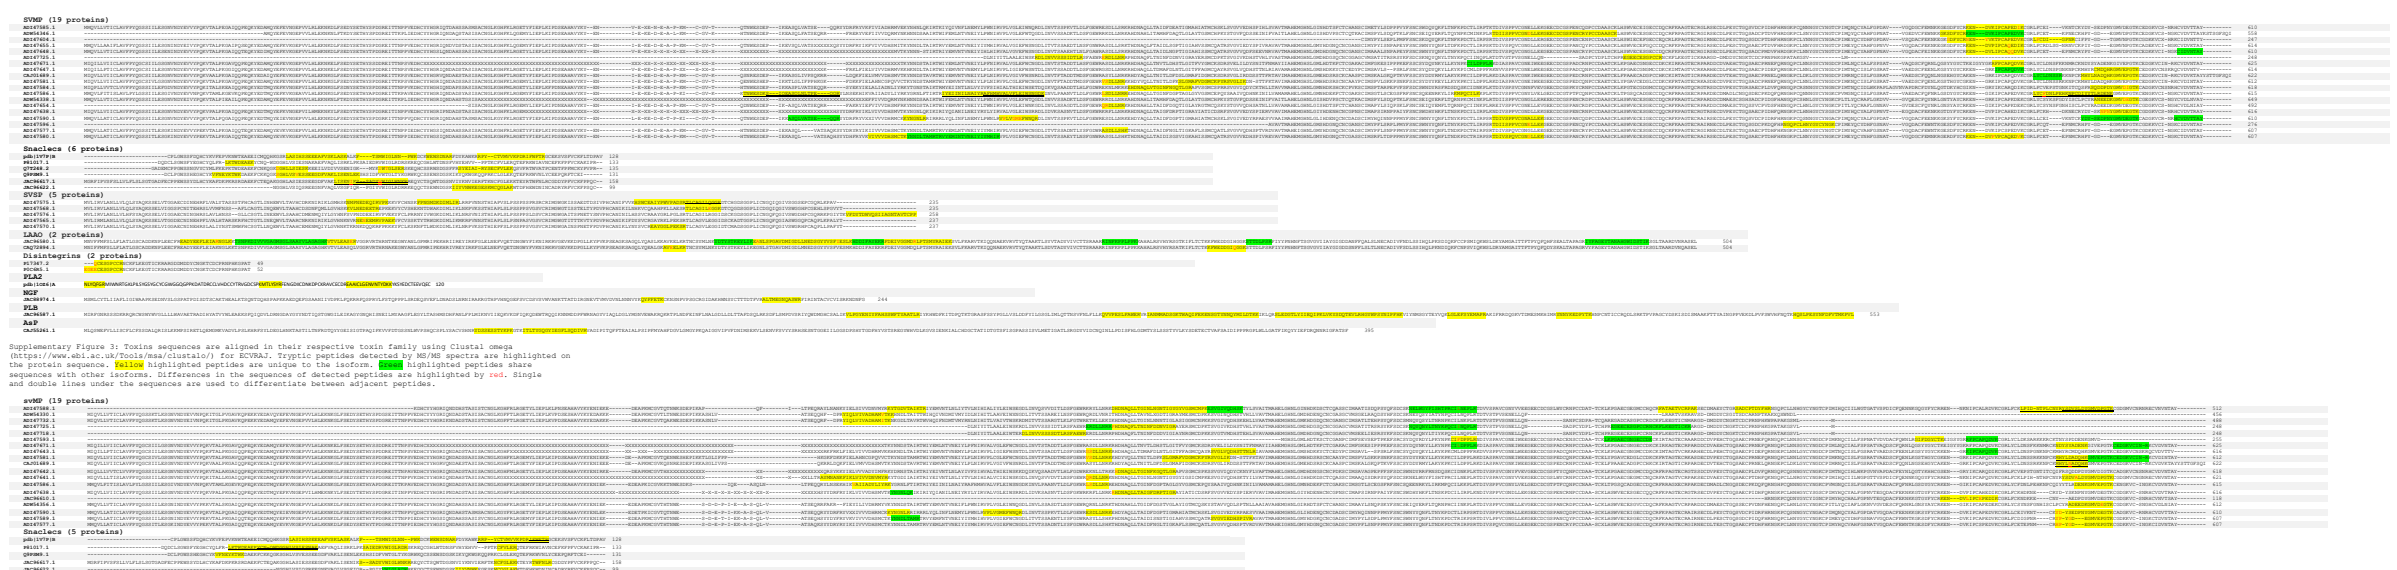

Supplementary Figure 3: Toxin sequences are aligned in their respective toxin family using Clustal omega (<https://www.ebi.ac.uk/Tools/seqservices/seqlogo/>) for ECVM. Tryptic peptides detected by MS/MS spectra are highlighted on the protein sequence. **Yellow** highlighted peptides are unique to the isoform. **Green** highlighted peptides share sequences with other isoforms. Differences in the sequences of detected peptides are highlighted by red. Single and double lines under the sequences are used to differentiate between adjacent peptides.

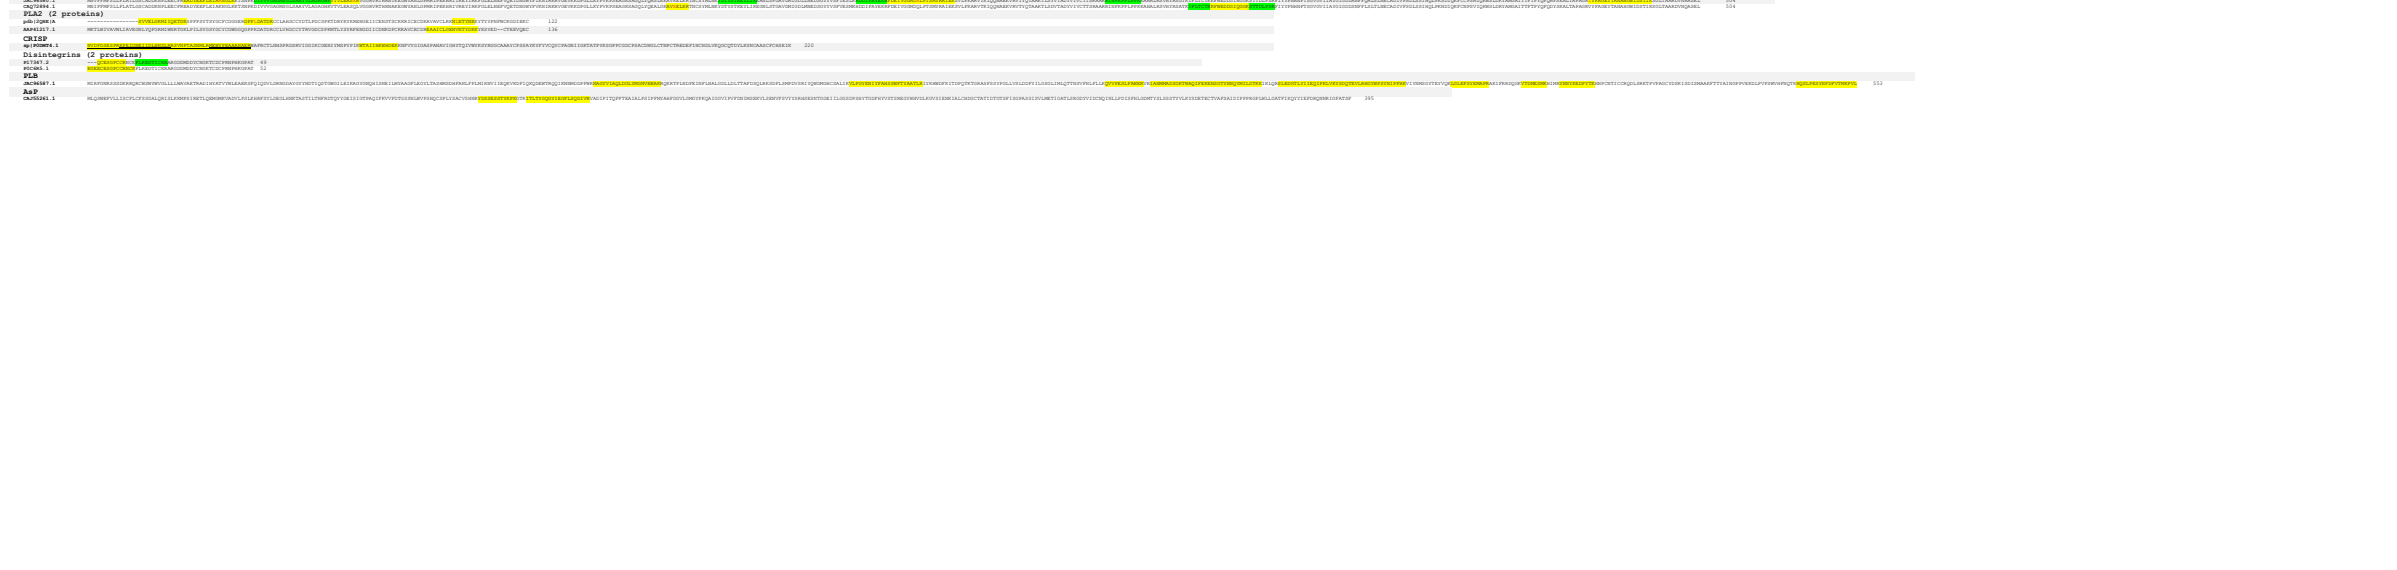

Supplement: mmc3.pdf [file mmc3.pdf]
